# Supplementary material for: Reliability and validity of three questionnaires measuring context-specific sedentary behaviour and associated correlates in adolescents, adults and older adults
Source: PubMed Central journal article supplement (PMC4574538; doi:10.1186/s12966-015-0277-2), 2015-09-17
Supplement: 12966_2015_277_MOESM1_ESM.pdf [file 12966_2015_277_MOESM1_ESM.pdf]

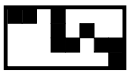

5147

|  |  |  |  |  |  |
|--|--|--|--|--|--|
|  |  |  |  |  |  |
|--|--|--|--|--|--|

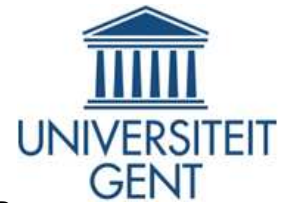

## **Vragenlijst secundair onderwijs**

Het is belangrijk elke vraag goed te lezen en te noteren hoe jij je persoonlijk voelt bij elke stelling. Verder dient deze vragenlijst zo correct mogelijk ingevuld te worden (er zijn geen foute antwoorden). De antwoorden worden vertrouwelijk verwerkt! Je deelname aan deze studie is vrijwillig. Als je deze vragenlijst niet wilt invullen, mag je ons dit zeggen.

Tijdens het invullen van de vragenlijst moet je **rekening** houden met volgende zaken:

- Gelieve slechts **1 antwoord** aan te duiden (indien meerdere antwoorden mogelijk zijn, zal dit bij de vraag vermeld staan).
- Indien er een antwoord voluit geschreven moet worden, gelieve dit in **drukletters** te doen. Bij andere vragen moet je een kruis ("X") in het vakje bij het juiste antwoord plaatsen. Indien je een **antwoord wil veranderen**, laat de "X" staan bij het foute antwoord en maak het vakje met het juiste antwoord volledig zwart.
- Onder **gezinsleden** verstaan we: ouders, broers of zussen, opvoeder,...

**We willen je alvast bedanken voor het invullen van deze vragenlijst!**



Hoe bekijk je de nabije omgeving van jouw woonplaats (binnen straal van 1 km of op 10-15 minuten wandelen)?

|                                                                                               | Helemaal niet akkoord    | Eerder niet akkoord      | Neutraal                 | Eerder akkoord           | Helemaal akkoord         |
|-----------------------------------------------------------------------------------------------|--------------------------|--------------------------|--------------------------|--------------------------|--------------------------|
| A6) De meeste woningen in mijn buurt zijn alleenstaande woningen (open bebouwing).            | <input type="checkbox"/> | <input type="checkbox"/> | <input type="checkbox"/> | <input type="checkbox"/> | <input type="checkbox"/> |
| A7) Er zijn veel winkels op wandelafstand van mijn huis.                                      | <input type="checkbox"/> | <input type="checkbox"/> | <input type="checkbox"/> | <input type="checkbox"/> | <input type="checkbox"/> |
| A8) Er is een halte van het openbaar vervoer (bus en/of tram) op wandelafstand van mijn huis. | <input type="checkbox"/> | <input type="checkbox"/> | <input type="checkbox"/> | <input type="checkbox"/> | <input type="checkbox"/> |
| A9) Er is een park op wandelafstand van mijn huis.                                            | <input type="checkbox"/> | <input type="checkbox"/> | <input type="checkbox"/> | <input type="checkbox"/> | <input type="checkbox"/> |
| A10) Wandelen is gevaarlijk omwille van het verkeer in mijn buurt.                            | <input type="checkbox"/> | <input type="checkbox"/> | <input type="checkbox"/> | <input type="checkbox"/> | <input type="checkbox"/> |
| A11) Wandelen in mijn buurt is gevaarlijk omwille van de hoge kans op misdaad.                | <input type="checkbox"/> | <input type="checkbox"/> | <input type="checkbox"/> | <input type="checkbox"/> | <input type="checkbox"/> |
| A12) In mijn buurt staan er bomen langs de straten.                                           | <input type="checkbox"/> | <input type="checkbox"/> | <input type="checkbox"/> | <input type="checkbox"/> | <input type="checkbox"/> |
| A13) Ik vind mijn buurt een goede plaats om in te leven.                                      | <input type="checkbox"/> | <input type="checkbox"/> | <input type="checkbox"/> | <input type="checkbox"/> | <input type="checkbox"/> |
| A14) De omgeving nodigt uit om te bewegen (geen heuvels, goed onderhouden voetpad,...).       | <input type="checkbox"/> | <input type="checkbox"/> | <input type="checkbox"/> | <input type="checkbox"/> | <input type="checkbox"/> |

Hoeveel van onderstaande niet draagbare toestellen zijn aanwezig bij jouw thuis EN maak je ZELF ook gebruik van?

|                                                         | Geen                     | 1                        | 2                        | 3                        | 4                        | 5                        | Meer dan 5               |
|---------------------------------------------------------|--------------------------|--------------------------|--------------------------|--------------------------|--------------------------|--------------------------|--------------------------|
| A15) Televisies                                         | <input type="checkbox"/> | <input type="checkbox"/> | <input type="checkbox"/> | <input type="checkbox"/> | <input type="checkbox"/> | <input type="checkbox"/> | <input type="checkbox"/> |
| A16) Videospelers/Dvd-spelers                           | <input type="checkbox"/> | <input type="checkbox"/> | <input type="checkbox"/> | <input type="checkbox"/> | <input type="checkbox"/> | <input type="checkbox"/> | <input type="checkbox"/> |
| A17) Muziekinstallaties (radio, CD-spelers, stereo,...) | <input type="checkbox"/> | <input type="checkbox"/> | <input type="checkbox"/> | <input type="checkbox"/> | <input type="checkbox"/> | <input type="checkbox"/> | <input type="checkbox"/> |
| A18) Vaste computer                                     | <input type="checkbox"/> | <input type="checkbox"/> | <input type="checkbox"/> | <input type="checkbox"/> | <input type="checkbox"/> | <input type="checkbox"/> | <input type="checkbox"/> |
| A19) Spelconsoles op tv (Xbox, Playstation,...)         | <input type="checkbox"/> | <input type="checkbox"/> | <input type="checkbox"/> | <input type="checkbox"/> | <input type="checkbox"/> | <input type="checkbox"/> | <input type="checkbox"/> |

Hoeveel van deze niet draagbare toestellen bevinden zich in jouw slaapkamer?

|                                                         | Geen                     | 1                        | 2                        | 3                        | 4                        | 5                        | Meer dan 5               |
|---------------------------------------------------------|--------------------------|--------------------------|--------------------------|--------------------------|--------------------------|--------------------------|--------------------------|
| A20) Televisies                                         | <input type="checkbox"/> | <input type="checkbox"/> | <input type="checkbox"/> | <input type="checkbox"/> | <input type="checkbox"/> | <input type="checkbox"/> | <input type="checkbox"/> |
| A21) Videospelers/Dvd-spelers                           | <input type="checkbox"/> | <input type="checkbox"/> | <input type="checkbox"/> | <input type="checkbox"/> | <input type="checkbox"/> | <input type="checkbox"/> | <input type="checkbox"/> |
| A22) Muziekinstallaties (radio, CD-spelers, stereo,...) | <input type="checkbox"/> | <input type="checkbox"/> | <input type="checkbox"/> | <input type="checkbox"/> | <input type="checkbox"/> | <input type="checkbox"/> | <input type="checkbox"/> |
| A23) Vaste computer                                     | <input type="checkbox"/> | <input type="checkbox"/> | <input type="checkbox"/> | <input type="checkbox"/> | <input type="checkbox"/> | <input type="checkbox"/> | <input type="checkbox"/> |
| A24) Spelconsoles op tv (Xbox, Playstation,...)         | <input type="checkbox"/> | <input type="checkbox"/> | <input type="checkbox"/> | <input type="checkbox"/> | <input type="checkbox"/> | <input type="checkbox"/> | <input type="checkbox"/> |

Gelieve het aantal draagbare toestellen te noteren die aanwezig zijn bij jouw thuis EN waarvan je ZELF ook gebruik maakt.

|                                            | Geen                     | 1                        | 2                        | 3                        | 4                        | 5                        | Meer dan 5               |
|--------------------------------------------|--------------------------|--------------------------|--------------------------|--------------------------|--------------------------|--------------------------|--------------------------|
| A25) Laptop                                | <input type="checkbox"/> | <input type="checkbox"/> | <input type="checkbox"/> | <input type="checkbox"/> | <input type="checkbox"/> | <input type="checkbox"/> | <input type="checkbox"/> |
| A26) GSM (geen smartphone)                 | <input type="checkbox"/> | <input type="checkbox"/> | <input type="checkbox"/> | <input type="checkbox"/> | <input type="checkbox"/> | <input type="checkbox"/> | <input type="checkbox"/> |
| A27) Smartphone                            | <input type="checkbox"/> | <input type="checkbox"/> | <input type="checkbox"/> | <input type="checkbox"/> | <input type="checkbox"/> | <input type="checkbox"/> | <input type="checkbox"/> |
| A28) Muziekspelers (zoals iPod, MP3,...)   | <input type="checkbox"/> | <input type="checkbox"/> | <input type="checkbox"/> | <input type="checkbox"/> | <input type="checkbox"/> | <input type="checkbox"/> | <input type="checkbox"/> |
| A29) Tablet (iPad, Samsung Galaxy Tab,...) | <input type="checkbox"/> | <input type="checkbox"/> | <input type="checkbox"/> | <input type="checkbox"/> | <input type="checkbox"/> | <input type="checkbox"/> | <input type="checkbox"/> |
| A30) Spelconsoles (PSP, Game Boy,...)      | <input type="checkbox"/> | <input type="checkbox"/> | <input type="checkbox"/> | <input type="checkbox"/> | <input type="checkbox"/> | <input type="checkbox"/> | <input type="checkbox"/> |

Het is belangrijk dat je elke periode van zitten of liggen slechts 1 keer in rekening brengt. Indien je bijvoorbeeld 1 uur in de zetel zat om televisie te kijken, maar terwijl ook op de laptop bezig was, reken deze tijd dan als 1 uur televisie kijken indien dit jouw voornaamste bezigheid was. Reken deze tijd dan niet opnieuw als 1 uur computergebruik.

### B) TELEVISIE (tv) KIJKEN IN DE VRIJE TIJD

TV kijken (zittend/liggend) = programma's, video's, DVD's en films afgespeeld op TV/computer !

Het spelen van spelletjes (gamen) op tv (Playstation, Xbox,...) telt hier **NIET** mee.

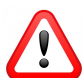

**Indien je geen tv kijkt in jouw vrije tijd --> ga naar pagina 8: "S) GAMING (=spelletjes spelen) in de vrije tijd"**

**B1) Hoe lang zat/lag je gemiddeld neer op één dag tijdens de laatste 7 dagen bij het kijken naar tv in de vrije tijd? Tv-kijken tijdens het eten valt ook hieronder. Beantwoord deze vragen afzonderlijk voor weekdag en weekenddag.**

| <b>tv-kijken</b>                               |                                                |
|------------------------------------------------|------------------------------------------------|
| <b>Weekdag</b>                                 | <b>Weekenddag</b>                              |
| <input type="checkbox"/> Niet                  | <input type="checkbox"/> Niet                  |
| <input type="checkbox"/> 1 tot 15 minuten/dag  | <input type="checkbox"/> 1 tot 15 minuten/dag  |
| <input type="checkbox"/> 15 tot 30 minuten/dag | <input type="checkbox"/> 15 tot 30 minuten/dag |
| <input type="checkbox"/> 30 tot 60 minuten/dag | <input type="checkbox"/> 30 tot 60 minuten/dag |
| <input type="checkbox"/> 1 tot 2 uren/dag      | <input type="checkbox"/> 1 tot 2 uren/dag      |
| <input type="checkbox"/> 2 tot 3 uren/dag      | <input type="checkbox"/> 2 tot 3 uren/dag      |
| <input type="checkbox"/> 3 tot 4 uren/dag      | <input type="checkbox"/> 3 tot 4 uren/dag      |
| <input type="checkbox"/> 4 tot 5 uren/dag      | <input type="checkbox"/> 4 tot 5 uren/dag      |
| <input type="checkbox"/> 5 tot 6 uren/dag      | <input type="checkbox"/> 5 tot 6 uren/dag      |
| <input type="checkbox"/> 6 tot 7 uren/dag      | <input type="checkbox"/> 6 tot 7 uren/dag      |
| <input type="checkbox"/> Meer dan 7 uren/dag   | <input type="checkbox"/> Meer dan 7 uren/dag   |

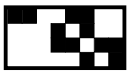

Gelieve aan te duiden in welke mate je akkoord gaat met elk van onderstaande stellingen.

|                                                                                                  | Helemaal niet akkoord    | Eerder niet akkoord      | Neutraal                 | Eerder akkoord           | Helemaal akkoord         | Niet van toepassing      |
|--------------------------------------------------------------------------------------------------|--------------------------|--------------------------|--------------------------|--------------------------|--------------------------|--------------------------|
| B2) Ik vind tv-kijken leuk.                                                                      | <input type="checkbox"/> | <input type="checkbox"/> | <input type="checkbox"/> | <input type="checkbox"/> | <input type="checkbox"/> |                          |
| B3) Tv-kijken verhindert me om andere belangrijkere dingen te doen.                              | <input type="checkbox"/> | <input type="checkbox"/> | <input type="checkbox"/> | <input type="checkbox"/> | <input type="checkbox"/> |                          |
| B4) Ik kijk graag verschillende uren aan een stuk tv.                                            | <input type="checkbox"/> | <input type="checkbox"/> | <input type="checkbox"/> | <input type="checkbox"/> | <input type="checkbox"/> |                          |
| B5) Tv-kijken is mijn manier om te ontspannen.                                                   | <input type="checkbox"/> | <input type="checkbox"/> | <input type="checkbox"/> | <input type="checkbox"/> | <input type="checkbox"/> |                          |
| B6) Mijn gezinsleden vinden dat ik te veel tv kijk.                                              | <input type="checkbox"/> | <input type="checkbox"/> | <input type="checkbox"/> | <input type="checkbox"/> | <input type="checkbox"/> | <input type="checkbox"/> |
| B7) Ik vind van mezelf dat ik te veel tv kijk.                                                   | <input type="checkbox"/> | <input type="checkbox"/> | <input type="checkbox"/> | <input type="checkbox"/> | <input type="checkbox"/> |                          |
| B8) Ik zou het zien zitten om de tijd die ik tv kijk te verminderen.                             | <input type="checkbox"/> | <input type="checkbox"/> | <input type="checkbox"/> | <input type="checkbox"/> | <input type="checkbox"/> |                          |
| B9) Ik zou het zien zitten om tijdens het weekend overdag (tot 17 uur) <u>geen</u> tv te kijken. | <input type="checkbox"/> | <input type="checkbox"/> | <input type="checkbox"/> | <input type="checkbox"/> | <input type="checkbox"/> |                          |
| B10) Ik zou het zien zitten om de tv <u>niet</u> aan te zetten tijdens het eten.                 | <input type="checkbox"/> | <input type="checkbox"/> | <input type="checkbox"/> | <input type="checkbox"/> | <input type="checkbox"/> |                          |
| B11) Mijn gezinsleden moedigen me aan om minder tv te kijken.                                    | <input type="checkbox"/> | <input type="checkbox"/> | <input type="checkbox"/> | <input type="checkbox"/> | <input type="checkbox"/> | <input type="checkbox"/> |
| B12) Mijn vrienden moedigen me aan om minder tv te kijken.                                       | <input type="checkbox"/> | <input type="checkbox"/> | <input type="checkbox"/> | <input type="checkbox"/> | <input type="checkbox"/> |                          |

**B13) Ik denk dat jongeren van mijn leeftijd beter niet meer dan...**

- 30 minuten tv kijken per dag
- 1 uur tv kijken per dag
- 2 uur tv kijken per dag
- 3 uur tv kijken per dag
- 4 uur tv kijken per dag
- 5 uur tv kijken per dag

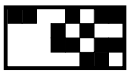

5147

**B14) Waar staat het tv-toestel waar je het meest naar kijkt?**

- In de keuken  
 In de woonkamer  
 In een aparte kamer  
 In de slaapkamer  
 In een andere kamer (noteer) \_\_\_\_\_

**B15) Hoeveel tijd kijken jouw gezinsleden gemiddeld naar tv in de vrije tijd?**

| OUDERS/OPVOEDERS                               |                                              | BROERS en/of ZUSSEN                            |                                              |
|------------------------------------------------|----------------------------------------------|------------------------------------------------|----------------------------------------------|
| <input type="checkbox"/> Niet van toepassing   | <input type="checkbox"/> 2 tot 3 uur/dag     | <input type="checkbox"/> Niet van toepassing   | <input type="checkbox"/> 2 tot 3 uur/dag     |
| <input type="checkbox"/> Kijken geen tv        | <input type="checkbox"/> 3 tot 4 uur/dag     | <input type="checkbox"/> Kijken geen tv        | <input type="checkbox"/> 3 tot 4 uur/dag     |
| <input type="checkbox"/> 1 tot 15 minuten/dag  | <input type="checkbox"/> 4 tot 5 uren/dag    | <input type="checkbox"/> 1 tot 15 minuten/dag  | <input type="checkbox"/> 4 tot 5 uren/dag    |
| <input type="checkbox"/> 15 tot 30 minuten/dag | <input type="checkbox"/> 5 tot 6 uren/dag    | <input type="checkbox"/> 15 tot 30 minuten/dag | <input type="checkbox"/> 5 tot 6 uren/dag    |
| <input type="checkbox"/> 30 tot 60 minuten/dag | <input type="checkbox"/> 6 tot 7 uren/dag    | <input type="checkbox"/> 30 tot 60 minuten/dag | <input type="checkbox"/> 6 tot 7 uren/dag    |
| <input type="checkbox"/> 1 tot 2 uur/dag       | <input type="checkbox"/> Meer dan 7 uren/dag | <input type="checkbox"/> 1 tot 2 uur/dag       | <input type="checkbox"/> Meer dan 7 uren/dag |

**B16) Hoe vaak kijk je SAMEN met jouw gezinsleden naar tv in de vrije tijd?****A) OUDERS/OPVOEDERS**

- Niet van toepassing    Nooit    Zelden    Soms    Vaak    Heel vaak

**B) BROERS en/of ZUSSEN**

- Niet van toepassing    Nooit    Zelden    Soms    Vaak    Heel vaak

Duid voor elke stelling aan in welke mate je het zou zien zitten om onderstaande zaken uit te voeren.

**OPMERKING:** Indien je bepaalde zaken al doet --> aanduiden "ik zie dit zeker zitten".

| In welke mate zou je het zien zitten om...                                                                              | Ik zie dit helemaal niet zitten | Ik zie dit eerder niet zitten | Neutraal                 | Ik zie dit eerder wel zitten | Ik zie dit zeker zitten  |
|-------------------------------------------------------------------------------------------------------------------------|---------------------------------|-------------------------------|--------------------------|------------------------------|--------------------------|
| B17) taken rechtstaand uit te voeren terwijl je tv aan het kijken bent (licht fysiek actieve rechtsaande activiteiten). | <input type="checkbox"/>        | <input type="checkbox"/>      | <input type="checkbox"/> | <input type="checkbox"/>     | <input type="checkbox"/> |
| B18) een uur tv-kijken te vervangen door licht fysiek actieve rechtstaande activiteiten.                                | <input type="checkbox"/>        | <input type="checkbox"/>      | <input type="checkbox"/> | <input type="checkbox"/>     | <input type="checkbox"/> |
| B19) tijdens de reclame op tv kort recht te staan.                                                                      | <input type="checkbox"/>        | <input type="checkbox"/>      | <input type="checkbox"/> | <input type="checkbox"/>     | <input type="checkbox"/> |
| B20) recht te staan om van zender te veranderen.                                                                        | <input type="checkbox"/>        | <input type="checkbox"/>      | <input type="checkbox"/> | <input type="checkbox"/>     | <input type="checkbox"/> |

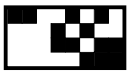

5147

**B21) Hebben je ouders/opvoeders regels over hoeveel uur per dag je tv mag kijken?**

Ja

Neen

**Hoe beoordeel je volgende beweringen omtrent de voorzieningen bij jou thuis?**

("niet van toepassing"= geen tv of geen zetels)

|                                                                                              | Helemaal niet akkoord    | Eerder niet akkoord      | Neutraal                 | Eerder akkoord           | Helemaal akkoord         | Niet van toepassing      |
|----------------------------------------------------------------------------------------------|--------------------------|--------------------------|--------------------------|--------------------------|--------------------------|--------------------------|
| B22) De afstandsbediening van de tv ligt steeds binnen handbereik wanneer ik deze nodig heb. | <input type="checkbox"/> | <input type="checkbox"/> | <input type="checkbox"/> | <input type="checkbox"/> | <input type="checkbox"/> | <input type="checkbox"/> |
| B23) De zetels bij ons thuis zijn comfortabel om gedurende een lange tijd in te zitten.      | <input type="checkbox"/> | <input type="checkbox"/> | <input type="checkbox"/> | <input type="checkbox"/> | <input type="checkbox"/> | <input type="checkbox"/> |

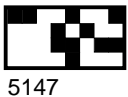**S) GAMING (=spelletjes spelen) in de vrije tijd****Onder gaming verstaan we volgende zaken:**

- 1) zittend spelen van spelconsoles op televisie (Playstation, Xbox, Nintendo,...)  
 2) zittend spelen van spelletjes op de computer/tablet  
 3) zittend spelen van spelletjes op GSM/smartphone

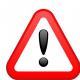

==> Het rechtstaand spelen van spelletjes zoals Wii games (Wii Fit,...)/... , telt hier **NIET** mee!

**Indien je nooit één van bovenstaande zaken doet, dan mag je verder naar pagina 10:**

**"C) Computergebruik in de vrije tijd".**

**S1) Hoe lang zat/lag je gemiddeld neer op één dag tijdens de laatste 7 dagen bij gaming in de vrije tijd?**

**Beantwoord deze vraag afzonderlijk voor weekdag en weekenddag.**

| Weekdag                                        | Weekenddag                                     |
|------------------------------------------------|------------------------------------------------|
| <input type="checkbox"/> Niet                  | <input type="checkbox"/> Niet                  |
| <input type="checkbox"/> 1 tot 15 minuten/dag  | <input type="checkbox"/> 1 tot 15 minuten/dag  |
| <input type="checkbox"/> 15 tot 30 minuten/dag | <input type="checkbox"/> 15 tot 30 minuten/dag |
| <input type="checkbox"/> 30 tot 60 minuten/dag | <input type="checkbox"/> 30 tot 60 minuten/dag |
| <input type="checkbox"/> 1 tot 2 uren/dag      | <input type="checkbox"/> 1 tot 2 uren/dag      |
| <input type="checkbox"/> 2 tot 3 uren/dag      | <input type="checkbox"/> 2 tot 3 uren/dag      |
| <input type="checkbox"/> 3 tot 4 uren/dag      | <input type="checkbox"/> 3 tot 4 uren/dag      |
| <input type="checkbox"/> 4 tot 5 uren/dag      | <input type="checkbox"/> 4 tot 5 uren/dag      |
| <input type="checkbox"/> 5 tot 6 uren/dag      | <input type="checkbox"/> 5 tot 6 uren/dag      |
| <input type="checkbox"/> 6 tot 7 uren/dag      | <input type="checkbox"/> 6 tot 7 uren/dag      |
| <input type="checkbox"/> Meer dan 7 uren/dag   | <input type="checkbox"/> Meer dan 7 uren/dag   |

**Gelieve aan te duiden in welke mate je akkoord gaat met elk van onderstaande stellingen (zittend gamen).**

|                                                                                  | Helemaal niet akkoord    | Eerder niet akkoord      | Neutraal                 | Eerder akkoord           | Helemaal akkoord         | Niet van toepassing      |
|----------------------------------------------------------------------------------|--------------------------|--------------------------|--------------------------|--------------------------|--------------------------|--------------------------|
| S2) Ik vind het leuk om te gamen.                                                | <input type="checkbox"/> | <input type="checkbox"/> | <input type="checkbox"/> | <input type="checkbox"/> | <input type="checkbox"/> |                          |
| S3) Ik vind het leuk om vele uren te gamen                                       | <input type="checkbox"/> | <input type="checkbox"/> | <input type="checkbox"/> | <input type="checkbox"/> | <input type="checkbox"/> |                          |
| S4) Het spelen van games verhindert me belangrijkere zaken te doen.              | <input type="checkbox"/> | <input type="checkbox"/> | <input type="checkbox"/> | <input type="checkbox"/> | <input type="checkbox"/> |                          |
| S5) Gamen is mijn manier om te ontspannen.                                       | <input type="checkbox"/> | <input type="checkbox"/> | <input type="checkbox"/> | <input type="checkbox"/> | <input type="checkbox"/> |                          |
| S6) Mijn ouders zouden blij zijn als ik minder tijd spendeer aan gaming.         | <input type="checkbox"/> | <input type="checkbox"/> | <input type="checkbox"/> | <input type="checkbox"/> | <input type="checkbox"/> |                          |
| S7) Mijn gezinsleden vinden dat ik te veel tijd spendeer aan gaming.             | <input type="checkbox"/> | <input type="checkbox"/> | <input type="checkbox"/> | <input type="checkbox"/> | <input type="checkbox"/> |                          |
| S8) Ik vind van mezelf dat ik te veel tijd spendeer aan gaming.                  | <input type="checkbox"/> | <input type="checkbox"/> | <input type="checkbox"/> | <input type="checkbox"/> | <input type="checkbox"/> | <input type="checkbox"/> |
| S9) Ik zou het zien zitten om de tijd die ik spendeer aan gaming te verminderen. | <input type="checkbox"/> | <input type="checkbox"/> | <input type="checkbox"/> | <input type="checkbox"/> | <input type="checkbox"/> |                          |
| S10) Mijn gezinsleden moedigen me aan om minder te gamen.                        | <input type="checkbox"/> | <input type="checkbox"/> | <input type="checkbox"/> | <input type="checkbox"/> | <input type="checkbox"/> |                          |
| S11) Mijn vrienden moedigen me aan om minder te gamen.                           | <input type="checkbox"/> | <input type="checkbox"/> | <input type="checkbox"/> | <input type="checkbox"/> | <input type="checkbox"/> |                          |



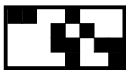

5147

**S12) Hoeveel tijd spenderen jouw gezinsleden gemiddeld al ZITTEND aan gaming in de vrije tijd?**

| OUDERS/OPVOEDERS                               |                                              | BROERS en/of ZUSSEN                            |                                              |
|------------------------------------------------|----------------------------------------------|------------------------------------------------|----------------------------------------------|
| <input type="checkbox"/> Niet van toepassing   | <input type="checkbox"/> 2 tot 3 uur/dag     | <input type="checkbox"/> Niet van toepassing   | <input type="checkbox"/> 2 tot 3 uur/dag     |
| <input type="checkbox"/> Gamen niet            | <input type="checkbox"/> 3 tot 4 uur/dag     | <input type="checkbox"/> Gamen niet            | <input type="checkbox"/> 3 tot 4 uur/dag     |
| <input type="checkbox"/> 1 tot 15 minuten/dag  | <input type="checkbox"/> 4 tot 5 uren/dag    | <input type="checkbox"/> 1 tot 15 minuten/dag  | <input type="checkbox"/> 4 tot 5 uren/dag    |
| <input type="checkbox"/> 15 tot 30 minuten/dag | <input type="checkbox"/> 5 tot 6 uren/dag    | <input type="checkbox"/> 15 tot 30 minuten/dag | <input type="checkbox"/> 5 tot 6 uren/dag    |
| <input type="checkbox"/> 30 tot 60 minuten/dag | <input type="checkbox"/> 6 tot 7 uren/dag    | <input type="checkbox"/> 30 tot 60 minuten/dag | <input type="checkbox"/> 6 tot 7 uren/dag    |
| <input type="checkbox"/> 1 tot 2 uur/dag       | <input type="checkbox"/> Meer dan 7 uren/dag | <input type="checkbox"/> 1 tot 2 uur/dag       | <input type="checkbox"/> Meer dan 7 uren/dag |

**S13) Hoe vaak ben je ZITTEND aan het gamen SAMEN met onderstaande personen in de vrije tijd?****A) OUDERS/OPVOEDERS**

Niet van toepassing    Nooit    Zelden    Soms    Vaak    Heel vaak

**B) BROERS en/of ZUSSEN**

Niet van toepassing    Nooit    Zelden    Soms    Vaak    Heel vaak

**C) VRIENDEN**

Niet van toepassing    Nooit    Zelden    Soms    Vaak    Heel vaak

Duid voor elke stelling aan in welke mate je het zou zien zitten om onderstaande zaken uit te voeren.

**OPMERKING:** indien je bepaalde zaken al doet --> aanduiden "ik zie dit zeker zitten".

| In welke mate zou je het zien zitten om...                                           | Ik zie dit helemaal niet zitten | Ik zie dit eerder niet zitten | Neutraal                 | Ik zie dit eerder wel zitten | Ik zie dit zeker zitten  |
|--------------------------------------------------------------------------------------|---------------------------------|-------------------------------|--------------------------|------------------------------|--------------------------|
| S14) rechtstaand te gamen.                                                           | <input type="checkbox"/>        | <input type="checkbox"/>      | <input type="checkbox"/> | <input type="checkbox"/>     | <input type="checkbox"/> |
| S15) een uur gamen te vervangen door licht fysiek actieve rechtstaande activiteiten. | <input type="checkbox"/>        | <input type="checkbox"/>      | <input type="checkbox"/> | <input type="checkbox"/>     | <input type="checkbox"/> |
| S16) na 30 minuten zittend gamen gedurende enkele minuten rechtstaan.                | <input type="checkbox"/>        | <input type="checkbox"/>      | <input type="checkbox"/> | <input type="checkbox"/>     | <input type="checkbox"/> |

**S17) Hebben jouw ouders/opvoeders regels over hoeveel uur per dag je mag gamen?**

Ja                       Neen

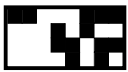

5147

## C) COMPUTERGEBRUIK IN DE VRIJE TIJD

De tijd die je op school of thuis voor school aan de computer doorbrengt, telt hier **NIET** mee. Met computergebruik (zittend/liggend) bedoelen we: E-mailen, websites bezoeken, chatten en sociale netwerksites (facebook,...) bezoeken,... Belangrijk is dat je hier ook rekening houdt met het gebruik van **tablets** (handcomputer zoals iPad). Ook internetgebruik op een **smartphone** valt hieronder.

**!! Opmerking: Het spelen van spelletjes op de computer telt bij ALLE onderstaande vragen NIET mee!!**

 **Indien je bovenstaande zaken (computer, tablet en smartphone) niet gebruikt --> ga naar pagina 13: "D) Gemotoriseerd transport"**

**C1) Hoe lang zat/lag je gemiddeld neer op één dag tijdens de laatste 7 dagen bij het gebruik van de computer in de vrije tijd? Beantwoord deze vraag afzonderlijk voor weekdag en weekenddag.**

| <b>Weekdag</b>                                 | <b>Weekenddag</b>                              |
|------------------------------------------------|------------------------------------------------|
| <input type="checkbox"/> Niet                  | <input type="checkbox"/> Niet                  |
| <input type="checkbox"/> 1 tot 15 minuten/dag  | <input type="checkbox"/> 1 tot 15 minuten/dag  |
| <input type="checkbox"/> 15 tot 30 minuten/dag | <input type="checkbox"/> 15 tot 30 minuten/dag |
| <input type="checkbox"/> 30 tot 60 minuten/dag | <input type="checkbox"/> 30 tot 60 minuten/dag |
| <input type="checkbox"/> 1 tot 2 uren/dag      | <input type="checkbox"/> 1 tot 2 uren/dag      |
| <input type="checkbox"/> 2 tot 3 uren/dag      | <input type="checkbox"/> 2 tot 3 uren/dag      |
| <input type="checkbox"/> 3 tot 4 uren/dag      | <input type="checkbox"/> 3 tot 4 uren/dag      |
| <input type="checkbox"/> 4 tot 5 uren/dag      | <input type="checkbox"/> 4 tot 5 uren/dag      |
| <input type="checkbox"/> 5 tot 6 uren/dag      | <input type="checkbox"/> 5 tot 6 uren/dag      |
| <input type="checkbox"/> 6 tot 7 uren/dag      | <input type="checkbox"/> 6 tot 7 uren/dag      |
| <input type="checkbox"/> Meer dan 7 uren/dag   | <input type="checkbox"/> Meer dan 7 uren/dag   |

**C2) Hoeveel tijd gebruiken jouw gezinsleden gemiddeld al zittend/liggend een computer in de vrije tijd?**

| <b>OUDERS/OPVOEDERS</b>                          |                                              | <b>BROERS en/of ZUSSEN</b>                       |                                              |
|--------------------------------------------------|----------------------------------------------|--------------------------------------------------|----------------------------------------------|
| <input type="checkbox"/> Niet van toepassing     | <input type="checkbox"/> 2 tot 3 uur/dag     | <input type="checkbox"/> Niet van toepassing     | <input type="checkbox"/> 2 tot 3 uur/dag     |
| <input type="checkbox"/> Gebruiken geen computer | <input type="checkbox"/> 3 tot 4 uur/dag     | <input type="checkbox"/> Gebruiken geen computer | <input type="checkbox"/> 3 tot 4 uur/dag     |
| <input type="checkbox"/> 1 tot 15 minuten/dag    | <input type="checkbox"/> 4 tot 5 uren/dag    | <input type="checkbox"/> 1 tot 15 minuten/dag    | <input type="checkbox"/> 4 tot 5 uren/dag    |
| <input type="checkbox"/> 15 tot 30 minuten/dag   | <input type="checkbox"/> 5 tot 6 uren/dag    | <input type="checkbox"/> 15 tot 30 minuten/dag   | <input type="checkbox"/> 5 tot 6 uren/dag    |
| <input type="checkbox"/> 30 tot 60 minuten/dag   | <input type="checkbox"/> 6 tot 7 uren/dag    | <input type="checkbox"/> 30 tot 60 minuten/dag   | <input type="checkbox"/> 6 tot 7 uren/dag    |
| <input type="checkbox"/> 1 tot 2 uur/dag         | <input type="checkbox"/> Meer dan 7 uren/dag | <input type="checkbox"/> 1 tot 2 uur/dag         | <input type="checkbox"/> Meer dan 7 uren/dag |

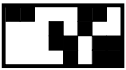

5147

**C3) Hoe vaak gebruik je een computer en dit op hetzelfde moment wanneer een ander gezinslid in dezelfde ruimte een andere computer gebruikt in de vrije tijd?**

**A) OUDERS/OPVOEDERS**

Niet van toepassing    Nooit    Zelden    Soms    Vaak    Heel vaak

**B) BROERS en/of ZUSSEN**

Niet van toepassing    Nooit    Zelden    Soms    Vaak    Heel vaak

**Duid voor elke stelling aan in welke mate je het zou zien zitten om onderstaande zaken uit te voeren.**

**OPMERKING: indien je bepaalde zaken al doet --> aanduiden "ik zie dit zeker zitten".**

| <b>In welke mate zou je het zien zitten om...</b>                                             | <b>Ik zie dit helemaal niet zitten</b> | <b>Ik zie dit eerder niet zitten</b> | <b>Neutraal</b>          | <b>Ik zie dit eerder wel zitten</b> | <b>Ik zie dit zeker zitten</b> |
|-----------------------------------------------------------------------------------------------|----------------------------------------|--------------------------------------|--------------------------|-------------------------------------|--------------------------------|
| C4) rechtstaand de computer te gebruiken.                                                     | <input type="checkbox"/>               | <input type="checkbox"/>             | <input type="checkbox"/> | <input type="checkbox"/>            | <input type="checkbox"/>       |
| C5) een uur computergebruik te vervangen door licht fysiek actieve rechtstaande activiteiten. | <input type="checkbox"/>               | <input type="checkbox"/>             | <input type="checkbox"/> | <input type="checkbox"/>            | <input type="checkbox"/>       |
| C6) na 30 minuten de computer te hebben gebruikt gedurende enkele minuten recht te staan.     | <input type="checkbox"/>               | <input type="checkbox"/>             | <input type="checkbox"/> | <input type="checkbox"/>            | <input type="checkbox"/>       |

**C7) Hebben jouw ouders/opvoeders regels over hoeveel uur per dag je de computer mag gebruiken?**

Ja                       Neen

Gelieve aan te duiden in welke mate je akkoord gaat met elk van de volgende stellingen over computergebruik in de vrije tijd.

|                                                                                                                  | Helemaal niet akkoord    | Eerder niet akkoord      | Neutraal                 | Eerder akkoord           | Helemaal akkoord         | Niet van toepassing      |
|------------------------------------------------------------------------------------------------------------------|--------------------------|--------------------------|--------------------------|--------------------------|--------------------------|--------------------------|
| C8) Ik vind het leuk om in de vrije tijd de computer te gebruiken.                                               | <input type="checkbox"/> | <input type="checkbox"/> | <input type="checkbox"/> | <input type="checkbox"/> | <input type="checkbox"/> |                          |
| C9) De computer gebruiken verhindert me belangrijkere zaken te doen.                                             | <input type="checkbox"/> | <input type="checkbox"/> | <input type="checkbox"/> | <input type="checkbox"/> | <input type="checkbox"/> |                          |
| C10) Ik vind het plezierig gedurende een lange tijd de computer te gebruiken.                                    | <input type="checkbox"/> | <input type="checkbox"/> | <input type="checkbox"/> | <input type="checkbox"/> | <input type="checkbox"/> |                          |
| C11) De computer gebruiken is mijn manier om te ontspannen.                                                      | <input type="checkbox"/> | <input type="checkbox"/> | <input type="checkbox"/> | <input type="checkbox"/> | <input type="checkbox"/> |                          |
| C12) Mijn gezinsleden vinden dat ik te veel de computer gebruik.                                                 | <input type="checkbox"/> | <input type="checkbox"/> | <input type="checkbox"/> | <input type="checkbox"/> | <input type="checkbox"/> | <input type="checkbox"/> |
| C13) Ik vind van mezelf dat ik te veel de computer gebruik in mijn vrije tijd.                                   | <input type="checkbox"/> | <input type="checkbox"/> | <input type="checkbox"/> | <input type="checkbox"/> | <input type="checkbox"/> |                          |
| C14) Ik zou het zien zitten om de computer gedurende enkele dagen in de week niet te gebruiken in de vrije tijd. | <input type="checkbox"/> | <input type="checkbox"/> | <input type="checkbox"/> | <input type="checkbox"/> | <input type="checkbox"/> |                          |
| C15) Ik zou het zien zitten om de tijd die ik spendeer aan computergebruik te verminderen in de vrije tijd.      | <input type="checkbox"/> | <input type="checkbox"/> | <input type="checkbox"/> | <input type="checkbox"/> | <input type="checkbox"/> |                          |
| C16) Mijn gezinsleden moedigen me aan om minder de computer te gebruiken in de vrije tijd.                       | <input type="checkbox"/> | <input type="checkbox"/> | <input type="checkbox"/> | <input type="checkbox"/> | <input type="checkbox"/> | <input type="checkbox"/> |
| C17) Mijn vrienden moedigen me aan om minder de computer te gebruiken in de vrije tijd.                          | <input type="checkbox"/> | <input type="checkbox"/> | <input type="checkbox"/> | <input type="checkbox"/> | <input type="checkbox"/> |                          |

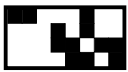

5147

## D) GEMOTORISEERD TRANSPORT

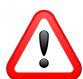

- 1) Onder gemotoriseerd transport verstaan we: auto, brommer, moto, trein, tram of bus.  
 2) Indien je nooit één van bovenstaande vervoersmiddelen gebruikt (als passagier of als bestuurder) dan mag je verder naar pagina 17: " E) School".

### VERPLAATSINGEN: VAN & NAAR SCHOOL

D1) Hoe lang ZAT je gemiddeld op één dag tijdens de laatste 7 dagen bij gemotoriseerde verplaatsingen van en naar school. Denk aan het gebruik van een auto, bus, trein, tram, moto of brommer; reken fietsen niet mee.

- |                                                 |                                                  |
|-------------------------------------------------|--------------------------------------------------|
| <input type="checkbox"/> Niet                   | <input type="checkbox"/> 2 tot 2.5 uren/dag      |
| <input type="checkbox"/> 1 tot 15 minuten/dag   | <input type="checkbox"/> 2.5 tot 3 uren/dag      |
| <input type="checkbox"/> 15 tot 30 minuten/dag  | <input type="checkbox"/> 3 tot 4 uren/dag        |
| <input type="checkbox"/> 30 tot 45 minuten/dag  | <input type="checkbox"/> 4 tot 5 uren/dag        |
| <input type="checkbox"/> 45 tot 60 minuten/dag  | <input type="checkbox"/> 5 tot 6 uren/dag        |
| <input type="checkbox"/> 60 tot 90 minuten/dag  | <input type="checkbox"/> 6 tot 7 uren/dag        |
| <input type="checkbox"/> 90 tot 120 minuten/dag | <input type="checkbox"/> Meer dan 7 uren per dag |

### VERPLAATSINGEN: IN DE VRIJE TIJD

D2) Hoe lang ZAT je gemiddeld op één dag tijdens de laatste 7 dagen bij gemotoriseerde verplaatsingen **BUITEN UW SCHOOLVERPLAATSINGEN**. Hou hier dus rekening met jouw transport in de vrije tijd (bv. naar winkel, vrienden opzoeken,...). Denk aan het gebruik van een auto, bus, trein, tram, moto of brommer; reken opnieuw fietsen niet mee. Doe dit apart voor weekdag en weekenddag.

| <b>Weekdag</b>                                   | <b>Weekenddag</b>                                |
|--------------------------------------------------|--------------------------------------------------|
| <input type="checkbox"/> Niet                    | <input type="checkbox"/> Niet                    |
| <input type="checkbox"/> 1 tot 15 minuten/dag    | <input type="checkbox"/> 1 tot 15 minuten/dag    |
| <input type="checkbox"/> 15 tot 30 minuten/dag   | <input type="checkbox"/> 15 tot 30 minuten/dag   |
| <input type="checkbox"/> 30 tot 45 minuten/dag   | <input type="checkbox"/> 30 tot 45 minuten/dag   |
| <input type="checkbox"/> 45 tot 60 minuten/dag   | <input type="checkbox"/> 45 tot 60 minuten/dag   |
| <input type="checkbox"/> 60 tot 90 minuten/dag   | <input type="checkbox"/> 60 tot 90 minuten/dag   |
| <input type="checkbox"/> 90 tot 120 minuten/dag  | <input type="checkbox"/> 90 tot 120 minuten/dag  |
| <input type="checkbox"/> 2 tot 2.5 uren/dag      | <input type="checkbox"/> 2 tot 2.5 uren/dag      |
| <input type="checkbox"/> 2.5 tot 3 uren/dag      | <input type="checkbox"/> 2.5 tot 3 uren/dag      |
| <input type="checkbox"/> 3 tot 4 uren/dag        | <input type="checkbox"/> 3 tot 4 uren/dag        |
| <input type="checkbox"/> 4 tot 5 uren/dag        | <input type="checkbox"/> 4 tot 5 uren/dag        |
| <input type="checkbox"/> 5 tot 6 uren/dag        | <input type="checkbox"/> 5 tot 6 uren/dag        |
| <input type="checkbox"/> 6 tot 7 uren/dag        | <input type="checkbox"/> 6 tot 7 uren/dag        |
| <input type="checkbox"/> Meer dan 7 uren per dag | <input type="checkbox"/> Meer dan 7 uren per dag |

D3) Gelieve aan te geven hoeveel tijd je gemiddeld per dag spendeerde aan wandelen buitenshuis op een rustig tempo (bv: slenteren = rustig stappen, wandelen op "gemak", niet gehaast) als deel van jouw transport (bv. iemand bezoeken, naar bus wandelen, naar winkel wandelen,...) tijdens de laatste 7 dagen. Let op: het wandelen moet dus een doel hebben (wandelen als ontspanning telt hier niet mee).

| Weekdag                                        | Weekenddag                                     |
|------------------------------------------------|------------------------------------------------|
| <input type="checkbox"/> Niet                  | <input type="checkbox"/> Niet                  |
| <input type="checkbox"/> 1 tot 15 minuten/dag  | <input type="checkbox"/> 1 tot 15 minuten/dag  |
| <input type="checkbox"/> 15 tot 30 minuten/dag | <input type="checkbox"/> 15 tot 30 minuten/dag |
| <input type="checkbox"/> 30 tot 45 minuten/dag | <input type="checkbox"/> 30 tot 45 minuten/dag |
| <input type="checkbox"/> 45 tot 60 minuten/dag | <input type="checkbox"/> 45 tot 60 minuten/dag |
| <input type="checkbox"/> 1 tot 2 uur/dag       | <input type="checkbox"/> 1 tot 2 uur/dag       |
| <input type="checkbox"/> Meer dan 2 uur/dag    | <input type="checkbox"/> Meer dan 2 uur/dag    |

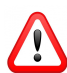

Om onderstaande vragen te beantwoorden dien je rekening te houden met jouw transport in de vrije tijd (naar winkel,...) EN jouw transport naar school.

Gelieve aan te duiden in welke mate je akkoord gaat met elk van onderstaande stellingen.

|                                                                                                                                                        | Helemaal niet akkoord    | Eerder niet akkoord      | Neutraal                 | Eerder akkoord           | Helemaal akkoord         | Niet van toepassing      |
|--------------------------------------------------------------------------------------------------------------------------------------------------------|--------------------------|--------------------------|--------------------------|--------------------------|--------------------------|--------------------------|
| D4) Ik vind het leuk om me met een gemotoriseerd voertuig te verplaatsen.                                                                              | <input type="checkbox"/> | <input type="checkbox"/> | <input type="checkbox"/> | <input type="checkbox"/> | <input type="checkbox"/> |                          |
| D5) Ik vind het leuk om als passagier tijdens gemotoriseerd transport aan bepaalde zaken te werken of uit te rusten (bv. schoolwerk, telefoneren,...). | <input type="checkbox"/> | <input type="checkbox"/> | <input type="checkbox"/> | <input type="checkbox"/> | <input type="checkbox"/> | <input type="checkbox"/> |
| D6) Ik voel me lui als ik op mijn bestemming aankom na mijn gemotoriseerd transport.                                                                   | <input type="checkbox"/> | <input type="checkbox"/> | <input type="checkbox"/> | <input type="checkbox"/> | <input type="checkbox"/> |                          |
| D7) Ik vind van mezelf dat ik te veel gebruik maak van gemotoriseerd transport.                                                                        | <input type="checkbox"/> | <input type="checkbox"/> | <input type="checkbox"/> | <input type="checkbox"/> | <input type="checkbox"/> |                          |
| D8) Ik zou het zien zitten om spontaan een halte vroeger uit te stappen uit tram/bus en het resterende eind te wandelen.                               | <input type="checkbox"/> | <input type="checkbox"/> | <input type="checkbox"/> | <input type="checkbox"/> | <input type="checkbox"/> |                          |
| D9) Ik zou het zien zitten om spontaan de fiets te nemen of te wandelen ook al kan ik gebruik maken van tram/bus of meerijden met auto.                | <input type="checkbox"/> | <input type="checkbox"/> | <input type="checkbox"/> | <input type="checkbox"/> | <input type="checkbox"/> |                          |
| D10) Mijn gezinsleden moedigen me aan om me op een (meer) actieve manier (fietsen, wandelen) te verplaatsen.                                           | <input type="checkbox"/> | <input type="checkbox"/> | <input type="checkbox"/> | <input type="checkbox"/> | <input type="checkbox"/> | <input type="checkbox"/> |
| D11) Mijn vrienden moedigen me aan om me op een (meer) actieve manier (fietsen, wandelen) te verplaatsen.                                              | <input type="checkbox"/> | <input type="checkbox"/> | <input type="checkbox"/> | <input type="checkbox"/> | <input type="checkbox"/> |                          |
| D12) Mijn gezinsleden vinden dat ik te veel gebruik maak van gemotoriseerd transport.                                                                  | <input type="checkbox"/> | <input type="checkbox"/> | <input type="checkbox"/> | <input type="checkbox"/> | <input type="checkbox"/> | <input type="checkbox"/> |

**D13) Wat zijn voor jou de voornaamste redenen om niet te wandelen of niet te fietsen? (meerdere antwoorden zijn mogelijk)**

- De omgeving is niet veilig om te wandelen of te fietsen
- Actief transport (wandelen of fietsen) is niet aantrekkelijk (geen groene omgeving in de buurt, saai,...)
- Actief transport is vermoeiend (zweeten, bagage dragen,...)
- De voorzieningen voor openbaar vervoer zijn goed uitgerust (bushaltes dicht bij de deur,...)
- Tijdsdruk
- Te grote afstand
- Weersomstandigheden
- Het combineren van verschillende taken (naar bakker, iemand bezoeken,...)
- Financiële redenen (goedkoper tarief studenten,...)
- Andere (noteer) \_\_\_\_\_
- Ik verplaats me altijd actief (wandelen en/of fietsen)

**D14) Hoe verplaatsen jouw gezinsleden zich meestal...**

**a) naar het werk of school?**

|                  | Niet van toepassing      | Gemotoriseerd transport  | Actief transport (wandelen/fietsen) |
|------------------|--------------------------|--------------------------|-------------------------------------|
| Ouders/opvoeders | <input type="checkbox"/> | <input type="checkbox"/> | <input type="checkbox"/>            |
| Broers/zussen    | <input type="checkbox"/> | <input type="checkbox"/> | <input type="checkbox"/>            |

**b) in de vrije tijd?**

|                  | Niet van toepassing      | Gemotoriseerd transport  | Actief transport (wandelen/fietsen) |
|------------------|--------------------------|--------------------------|-------------------------------------|
| Ouders/opvoeders | <input type="checkbox"/> | <input type="checkbox"/> | <input type="checkbox"/>            |
| Broers/zussen    | <input type="checkbox"/> | <input type="checkbox"/> | <input type="checkbox"/>            |

Duid voor elke stelling aan of je het zou zien zitten om onderstaande zaken uit te voeren.

**OPMERKING:** Indien je bepaalde zaken al doet --> aanduiden "ik zie dit zeker zitten".

| In welke mate zou je het zien zitten om:                                            | Ik zie dit helemaal niet zitten | Ik zie dit eerder niet zitten | Neutraal                 | Ik zie dit eerder wel zitten | Ik zie dit zeker zitten  |
|-------------------------------------------------------------------------------------|---------------------------------|-------------------------------|--------------------------|------------------------------|--------------------------|
| D15) spontaan recht te staan op de bus, trein of tram in plaats van neer te zitten. | <input type="checkbox"/>        | <input type="checkbox"/>      | <input type="checkbox"/> | <input type="checkbox"/>     | <input type="checkbox"/> |
| D16) na 30 minuten zitten in bus, trein of tram even kort te gaan rechtstaan.       | <input type="checkbox"/>        | <input type="checkbox"/>      | <input type="checkbox"/> | <input type="checkbox"/>     | <input type="checkbox"/> |

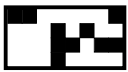

D17) Hoe vaak verplaats je je **SAMEN met jouw gezinsleden met gemotoriseerd transport**? Doe dit apart voor transport van/naar het werk of school en transport in de vrije tijd (afzonderlijk voor weekdag en weekenddag).

| Van/naar het werk of school                                                                                                                                                                                               |                                                                                                                                                                                                                           |
|---------------------------------------------------------------------------------------------------------------------------------------------------------------------------------------------------------------------------|---------------------------------------------------------------------------------------------------------------------------------------------------------------------------------------------------------------------------|
| Ouders/opvoeders                                                                                                                                                                                                          | Broers/zussen                                                                                                                                                                                                             |
| <input type="checkbox"/> Niet van toepassing<br><input type="checkbox"/> Nooit<br><input type="checkbox"/> Zelden<br><input type="checkbox"/> Soms<br><input type="checkbox"/> Vaak<br><input type="checkbox"/> Heel vaak | <input type="checkbox"/> Niet van toepassing<br><input type="checkbox"/> Nooit<br><input type="checkbox"/> Zelden<br><input type="checkbox"/> Soms<br><input type="checkbox"/> Vaak<br><input type="checkbox"/> Heel vaak |

| Vrije tijd                                                                                                                                                                                                                |                                                                                                                                                                                                                           |                                                                                                                                                                                                                           |                                                                                                                                                                                                                           |
|---------------------------------------------------------------------------------------------------------------------------------------------------------------------------------------------------------------------------|---------------------------------------------------------------------------------------------------------------------------------------------------------------------------------------------------------------------------|---------------------------------------------------------------------------------------------------------------------------------------------------------------------------------------------------------------------------|---------------------------------------------------------------------------------------------------------------------------------------------------------------------------------------------------------------------------|
| Ouders/opvoeders                                                                                                                                                                                                          |                                                                                                                                                                                                                           | Broers/zussen                                                                                                                                                                                                             |                                                                                                                                                                                                                           |
| Weekdag                                                                                                                                                                                                                   | Weekenddag                                                                                                                                                                                                                | Weekdag                                                                                                                                                                                                                   | Weekenddag                                                                                                                                                                                                                |
| <input type="checkbox"/> Niet van toepassing<br><input type="checkbox"/> Nooit<br><input type="checkbox"/> Zelden<br><input type="checkbox"/> Soms<br><input type="checkbox"/> Vaak<br><input type="checkbox"/> Heel vaak | <input type="checkbox"/> Niet van toepassing<br><input type="checkbox"/> Nooit<br><input type="checkbox"/> Zelden<br><input type="checkbox"/> Soms<br><input type="checkbox"/> Vaak<br><input type="checkbox"/> Heel vaak | <input type="checkbox"/> Niet van toepassing<br><input type="checkbox"/> Nooit<br><input type="checkbox"/> Zelden<br><input type="checkbox"/> Soms<br><input type="checkbox"/> Vaak<br><input type="checkbox"/> Heel vaak | <input type="checkbox"/> Niet van toepassing<br><input type="checkbox"/> Nooit<br><input type="checkbox"/> Zelden<br><input type="checkbox"/> Soms<br><input type="checkbox"/> Vaak<br><input type="checkbox"/> Heel vaak |

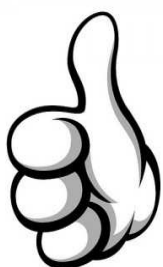

**Je bent al voorbij de helft van de vragen**

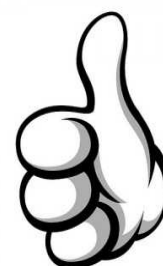



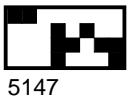

5147

## E) SCHOOL

E1) Hoeveel tijd bracht je gemiddeld per dag al zittend door tijdens de lesuren op school tijdens de laatste 7 dagen? De tijd die je thuis doorbrengt in functie van school telt hier NIET mee.

- |                                                |                                              |
|------------------------------------------------|----------------------------------------------|
| <input type="checkbox"/> Niet                  | <input type="checkbox"/> 3 tot 4 uren/dag    |
| <input type="checkbox"/> 1 tot 15 minuten/dag  | <input type="checkbox"/> 4 tot 5 uren/dag    |
| <input type="checkbox"/> 15 tot 30 minuten/dag | <input type="checkbox"/> 5 tot 6 uren/dag    |
| <input type="checkbox"/> 30 tot 60 minuten/dag | <input type="checkbox"/> 6 tot 7 uren/dag    |
| <input type="checkbox"/> 1 tot 2 uren/dag      | <input type="checkbox"/> Meer dan 7 uren/dag |
| <input type="checkbox"/> 2 tot 3 uren/dag      |                                              |

E2) Hoeveel uur lichamelijke opvoeding of sport krijg je tijdens de week op school (= echte lesuren, GEEN naschoolse activiteiten)? (reken hier ook de zwemlessen bij)

uur/uren  minuten per week

E3) Wat doe je meestal tijdens de speeltijd? (1 antwoord)

- Zitten
- Staan
- Wandelen
- Sporten/spelen
- Er is geen speeltijd

E4) Wat doe je meestal tijdens de middagpauze? (1 antwoord)

- Zitten
- Staan
- Wandelen
- Sporten/spelen
- Er is geen middagpauze

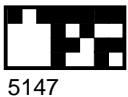**F) ANDERE ZITTENDE/LIGGENDE ACTIVITEITEN**

Hoe lang **zat/lag je gemiddeld op één dag** tijdens de **laatste 7 dagen** voor de volgende **zittende/liggende activiteiten**?

**OPMERKING:** A) MAALTIJDEN --> eten voor tv moet men hier **niet** meetellen & B) SCHOOLWERK --> huiswerk maken-studeren-werken op de computer voor school,... & C) zittend LEZEN--> enkel het lezen van papieren versies

|                                                                          |            | Niet                     | 1 tot 15<br>minuten<br>per dag | 15 tot<br>30<br>minuten<br>per dag | 30 tot 60<br>minuten<br>per dag | 1 tot 2<br>uur per<br>dag | 2 tot 3<br>uur per<br>dag | 3 tot 4<br>uur per<br>dag | 4 tot 5<br>uur per<br>dag | 5 tot 6<br>uur per<br>dag | 6 tot 7<br>uur per<br>dag | Meer<br>dan 7<br>uur per<br>dag |
|--------------------------------------------------------------------------|------------|--------------------------|--------------------------------|------------------------------------|---------------------------------|---------------------------|---------------------------|---------------------------|---------------------------|---------------------------|---------------------------|---------------------------------|
| <b>F1) Zittend lezen - niet voor school!</b><br>(boek, tijdschrift,...)  | weekdag    | <input type="checkbox"/> | <input type="checkbox"/>       | <input type="checkbox"/>           | <input type="checkbox"/>        | <input type="checkbox"/>  | <input type="checkbox"/>  | <input type="checkbox"/>  | <input type="checkbox"/>  | <input type="checkbox"/>  | <input type="checkbox"/>  | <input type="checkbox"/>        |
|                                                                          | weekenddag | <input type="checkbox"/> | <input type="checkbox"/>       | <input type="checkbox"/>           | <input type="checkbox"/>        | <input type="checkbox"/>  | <input type="checkbox"/>  | <input type="checkbox"/>  | <input type="checkbox"/>  | <input type="checkbox"/>  | <input type="checkbox"/>  | <input type="checkbox"/>        |
| <b>F2) Zitten bij hobby's</b><br>(vrijwilligers-werk, tekenschool,...)   | weekdag    | <input type="checkbox"/> | <input type="checkbox"/>       | <input type="checkbox"/>           | <input type="checkbox"/>        | <input type="checkbox"/>  | <input type="checkbox"/>  | <input type="checkbox"/>  | <input type="checkbox"/>  | <input type="checkbox"/>  | <input type="checkbox"/>  | <input type="checkbox"/>        |
|                                                                          | weekenddag | <input type="checkbox"/> | <input type="checkbox"/>       | <input type="checkbox"/>           | <input type="checkbox"/>        | <input type="checkbox"/>  | <input type="checkbox"/>  | <input type="checkbox"/>  | <input type="checkbox"/>  | <input type="checkbox"/>  | <input type="checkbox"/>  | <input type="checkbox"/>        |
| <b>F3) Zitten bij sociaal contact</b><br>(vrienden bezoeken, cinema,...) | weekdag    | <input type="checkbox"/> | <input type="checkbox"/>       | <input type="checkbox"/>           | <input type="checkbox"/>        | <input type="checkbox"/>  | <input type="checkbox"/>  | <input type="checkbox"/>  | <input type="checkbox"/>  | <input type="checkbox"/>  | <input type="checkbox"/>  | <input type="checkbox"/>        |
|                                                                          | weekenddag | <input type="checkbox"/> | <input type="checkbox"/>       | <input type="checkbox"/>           | <input type="checkbox"/>        | <input type="checkbox"/>  | <input type="checkbox"/>  | <input type="checkbox"/>  | <input type="checkbox"/>  | <input type="checkbox"/>  | <input type="checkbox"/>  | <input type="checkbox"/>        |
| <b>F4) Zittend naar muziek luisteren</b><br>(radio, MP3,...)             | weekdag    | <input type="checkbox"/> | <input type="checkbox"/>       | <input type="checkbox"/>           | <input type="checkbox"/>        | <input type="checkbox"/>  | <input type="checkbox"/>  | <input type="checkbox"/>  | <input type="checkbox"/>  | <input type="checkbox"/>  | <input type="checkbox"/>  | <input type="checkbox"/>        |
|                                                                          | weekenddag | <input type="checkbox"/> | <input type="checkbox"/>       | <input type="checkbox"/>           | <input type="checkbox"/>        | <input type="checkbox"/>  | <input type="checkbox"/>  | <input type="checkbox"/>  | <input type="checkbox"/>  | <input type="checkbox"/>  | <input type="checkbox"/>  | <input type="checkbox"/>        |
| <b>F5) Zitten tijdens maaltijden</b><br>(ontbijt-avond)                  | weekdag    | <input type="checkbox"/> | <input type="checkbox"/>       | <input type="checkbox"/>           | <input type="checkbox"/>        | <input type="checkbox"/>  | <input type="checkbox"/>  | <input type="checkbox"/>  | <input type="checkbox"/>  | <input type="checkbox"/>  | <input type="checkbox"/>  | <input type="checkbox"/>        |
|                                                                          | weekenddag | <input type="checkbox"/> | <input type="checkbox"/>       | <input type="checkbox"/>           | <input type="checkbox"/>        | <input type="checkbox"/>  | <input type="checkbox"/>  | <input type="checkbox"/>  | <input type="checkbox"/>  | <input type="checkbox"/>  | <input type="checkbox"/>  | <input type="checkbox"/>        |
| <b>F6) Zitten bij schoolwerk thuis uitgevoerd</b>                        | weekdag    | <input type="checkbox"/> | <input type="checkbox"/>       | <input type="checkbox"/>           | <input type="checkbox"/>        | <input type="checkbox"/>  | <input type="checkbox"/>  | <input type="checkbox"/>  | <input type="checkbox"/>  | <input type="checkbox"/>  | <input type="checkbox"/>  | <input type="checkbox"/>        |
|                                                                          | weekenddag | <input type="checkbox"/> | <input type="checkbox"/>       | <input type="checkbox"/>           | <input type="checkbox"/>        | <input type="checkbox"/>  | <input type="checkbox"/>  | <input type="checkbox"/>  | <input type="checkbox"/>  | <input type="checkbox"/>  | <input type="checkbox"/>  | <input type="checkbox"/>        |
| <b>F7) Zittend telefoneren</b><br>(bellen & SMS)                         | weekdag    | <input type="checkbox"/> | <input type="checkbox"/>       | <input type="checkbox"/>           | <input type="checkbox"/>        | <input type="checkbox"/>  | <input type="checkbox"/>  | <input type="checkbox"/>  | <input type="checkbox"/>  | <input type="checkbox"/>  | <input type="checkbox"/>  | <input type="checkbox"/>        |
|                                                                          | weekenddag | <input type="checkbox"/> | <input type="checkbox"/>       | <input type="checkbox"/>           | <input type="checkbox"/>        | <input type="checkbox"/>  | <input type="checkbox"/>  | <input type="checkbox"/>  | <input type="checkbox"/>  | <input type="checkbox"/>  | <input type="checkbox"/>  | <input type="checkbox"/>        |

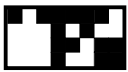

5147

Hoe vaak doe je onderstaande situaties op HETZELFDE (tegelijktijd) moment?

**OPMERKING:**

A) "niet van toepassing" kan enkel worden aangeduid als je een bepaald toestel niet gebruikt/heeft of één van beide activiteiten niet doet.

|                                               | Nooit                    | Zelden                   | Soms                     | Vaak                     | Heel vaak                | Niet van toepassing      |
|-----------------------------------------------|--------------------------|--------------------------|--------------------------|--------------------------|--------------------------|--------------------------|
| F8) tv kijken EN GSM gebruiken                | <input type="checkbox"/> | <input type="checkbox"/> | <input type="checkbox"/> | <input type="checkbox"/> | <input type="checkbox"/> | <input type="checkbox"/> |
| F9) tv kijken EN computer/tablet              | <input type="checkbox"/> | <input type="checkbox"/> | <input type="checkbox"/> | <input type="checkbox"/> | <input type="checkbox"/> | <input type="checkbox"/> |
| F10) computer EN GSM gebruiken                | <input type="checkbox"/> | <input type="checkbox"/> | <input type="checkbox"/> | <input type="checkbox"/> | <input type="checkbox"/> | <input type="checkbox"/> |
| F11) computer EN muziek luisteren             | <input type="checkbox"/> | <input type="checkbox"/> | <input type="checkbox"/> | <input type="checkbox"/> | <input type="checkbox"/> | <input type="checkbox"/> |
| F12) GSM (SMS) EN praten met vrienden/familie | <input type="checkbox"/> | <input type="checkbox"/> | <input type="checkbox"/> | <input type="checkbox"/> | <input type="checkbox"/> | <input type="checkbox"/> |
| F13) GSM EN muziek luisteren                  | <input type="checkbox"/> | <input type="checkbox"/> | <input type="checkbox"/> | <input type="checkbox"/> | <input type="checkbox"/> | <input type="checkbox"/> |

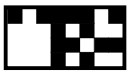

5147

**R) RECHTSTAANDE ACTIVITEITEN**

Gelieve aan te geven hoeveel tijd je gemiddeld per dag spendeerde aan de onderstaande rechtstaande activiteiten/situaties tijdens de laatste 7 dagen.

|                                                                                                          |            | Niet                     | 1 tot 15<br>minuten/dag  | 15 tot 30<br>minuten/dag | 30 tot 45<br>minuten/dag | 45 tot 60<br>minuten/dag | 1 tot 2<br>uur/dag       | Meer dan 2<br>uur/dag    |
|----------------------------------------------------------------------------------------------------------|------------|--------------------------|--------------------------|--------------------------|--------------------------|--------------------------|--------------------------|--------------------------|
| <b>ONTSPANNING (RECHTSTAAND UITGEVOERD)</b>                                                              |            |                          |                          |                          |                          |                          |                          |                          |
| <b>R1) Kleine kinderen</b> (rustig samen spelen,...)                                                     | weekdag    | <input type="checkbox"/> | <input type="checkbox"/> | <input type="checkbox"/> | <input type="checkbox"/> | <input type="checkbox"/> | <input type="checkbox"/> | <input type="checkbox"/> |
|                                                                                                          | weekenddag | <input type="checkbox"/> | <input type="checkbox"/> | <input type="checkbox"/> | <input type="checkbox"/> | <input type="checkbox"/> | <input type="checkbox"/> | <input type="checkbox"/> |
| <b>TUIN (RECHTSTAAND UITGEVOERD)</b>                                                                     |            |                          |                          |                          |                          |                          |                          |                          |
| R2) Planten water geven en/of dieren eten geven,...                                                      | weekdag    | <input type="checkbox"/> | <input type="checkbox"/> | <input type="checkbox"/> | <input type="checkbox"/> | <input type="checkbox"/> | <input type="checkbox"/> | <input type="checkbox"/> |
|                                                                                                          | weekenddag | <input type="checkbox"/> | <input type="checkbox"/> | <input type="checkbox"/> | <input type="checkbox"/> | <input type="checkbox"/> | <input type="checkbox"/> | <input type="checkbox"/> |
| <b>VERZORGING (RECHTSTAAND UITGEVOERD)</b>                                                               |            |                          |                          |                          |                          |                          |                          |                          |
| <b>R3) Verzorging</b> (douchen, scheren, make-up, tanden poetsen,...)                                    | weekdag    | <input type="checkbox"/> | <input type="checkbox"/> | <input type="checkbox"/> | <input type="checkbox"/> | <input type="checkbox"/> | <input type="checkbox"/> | <input type="checkbox"/> |
|                                                                                                          | weekenddag | <input type="checkbox"/> | <input type="checkbox"/> | <input type="checkbox"/> | <input type="checkbox"/> | <input type="checkbox"/> | <input type="checkbox"/> | <input type="checkbox"/> |
| <b>VRIJE TIJD/HOBBY'S (RECHTSTAAND UITGEVOERD)</b>                                                       |            |                          |                          |                          |                          |                          |                          |                          |
| R4) Staand tekenen, staand muziek luisteren, staand SMS'en, feesten (niet dansen), zingen, gitaar spelen | weekdag    | <input type="checkbox"/> | <input type="checkbox"/> | <input type="checkbox"/> | <input type="checkbox"/> | <input type="checkbox"/> | <input type="checkbox"/> | <input type="checkbox"/> |
|                                                                                                          | weekenddag | <input type="checkbox"/> | <input type="checkbox"/> | <input type="checkbox"/> | <input type="checkbox"/> | <input type="checkbox"/> | <input type="checkbox"/> | <input type="checkbox"/> |
| <b>WANDELEN OP RUSTIG TEMPO (bv. slenteren= rustig stappen, niet gehaast)</b>                            |            |                          |                          |                          |                          |                          |                          |                          |
| R5) Wandelen op rustig tempo (bv. slenteren) <u>in huis</u>                                              | weekdag    | <input type="checkbox"/> | <input type="checkbox"/> | <input type="checkbox"/> | <input type="checkbox"/> | <input type="checkbox"/> | <input type="checkbox"/> | <input type="checkbox"/> |
|                                                                                                          | weekenddag | <input type="checkbox"/> | <input type="checkbox"/> | <input type="checkbox"/> | <input type="checkbox"/> | <input type="checkbox"/> | <input type="checkbox"/> | <input type="checkbox"/> |
| <b>RECHTSTAAN TIJDENS DE LESUREN OP SCHOOL (praktijklessen, practica...)</b>                             |            |                          |                          |                          |                          |                          |                          |                          |
| R6) Rechtstaan tijdens lesuren, zoals practica                                                           | weekdag    | <input type="checkbox"/> | <input type="checkbox"/> | <input type="checkbox"/> | <input type="checkbox"/> | <input type="checkbox"/> | <input type="checkbox"/> | <input type="checkbox"/> |

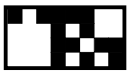

5147

## G) GEZONDHEID

Deze vragen gaan over je standpunten ten aanzien van jouw gezondheid. Al je antwoorden worden ook hier **strikt vertrouwelijk verwerkt!**

### G1) Wat vind je, over het algemeen genomen, van je gezondheid?

- Uitstekend
- Zeer goed
- Goed
- Matig
- Slecht

Hoe vaak heb je in de afgelopen 2 weken last gehad van één of meer van de volgende problemen?

|                                                    | Helemaal niet            | Verscheidene dagen       | Meer dan de helft van de dagen | Bijna elke dag           |
|----------------------------------------------------|--------------------------|--------------------------|--------------------------------|--------------------------|
| G2) Weinig interesse of plezier in activiteiten    | <input type="checkbox"/> | <input type="checkbox"/> | <input type="checkbox"/>       | <input type="checkbox"/> |
| G3) Je neerslachtig, depressief of hopeloos voelen | <input type="checkbox"/> | <input type="checkbox"/> | <input type="checkbox"/>       | <input type="checkbox"/> |

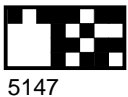

5147

## H) MATE VAN FYSIEKE ACTIVITEIT

Hoe ga je **MEESTAL** van en naar school? (duid slechts 1 antwoord aan & vul het totaal aantal minuten in = heen & terug opgeteld)

Met de fiets

minuten per dag

Te voet

minuten per dag

Met de auto, trein, bus of motorfiets

minuten per dag

Met de step, autopet, rollerblades, skeelers

minuten per dag

### H5) Hoeveel uur besteed je in totaal aan beweeg- of sportactiviteiten die op school worden georganiseerd buiten de turnlessen?

Dit zijn bijvoorbeeld sportactiviteiten tijdens de speeltijd, over de middag, tijdens de opvang, na de schooluren, op woensdagmiddag, op klastoernooien,...

**PAS OP!** Gelieve de turnlessen op school er niet bij te rekenen.

Op school worden geen extra beweeg- of sportactiviteiten gegeven

Af en toe

1 uur per maand

2 uur per maand

3 uur per maand

1 uur per week

2 uur per week

3 uur per week

4 uur per week

Meer dan 4 uur per week

Hoe verplaats je je **MEESTAL** in je VRIJE TIJD? Bijvoorbeeld: hoe ga je naar de sportclub, winkel, je vrienden, de film,...

**PAS OP!** De verplaatsingen van en naar school mag je niet meerekenen

Fietsen en wandelen als sport mag je ook niet meerekenen.

|                   |          | Niet                     | 0-10 min                 | 10-20 min                | 20-30 min                | 30-40 min                | 40-50 min                | 50-60 min                | 1u-1u10                  | Meer dan 1u10            |
|-------------------|----------|--------------------------|--------------------------|--------------------------|--------------------------|--------------------------|--------------------------|--------------------------|--------------------------|--------------------------|
| <b>WEEKDAG</b>    | Wandelen | <input type="checkbox"/> | <input type="checkbox"/> | <input type="checkbox"/> | <input type="checkbox"/> | <input type="checkbox"/> | <input type="checkbox"/> | <input type="checkbox"/> | <input type="checkbox"/> | <input type="checkbox"/> |
|                   | Fietsen  | <input type="checkbox"/> | <input type="checkbox"/> | <input type="checkbox"/> | <input type="checkbox"/> | <input type="checkbox"/> | <input type="checkbox"/> | <input type="checkbox"/> | <input type="checkbox"/> | <input type="checkbox"/> |
| <b>WEEKENDDAG</b> | Wandelen | <input type="checkbox"/> | <input type="checkbox"/> | <input type="checkbox"/> | <input type="checkbox"/> | <input type="checkbox"/> | <input type="checkbox"/> | <input type="checkbox"/> | <input type="checkbox"/> | <input type="checkbox"/> |
|                   | Fietsen  | <input type="checkbox"/> | <input type="checkbox"/> | <input type="checkbox"/> | <input type="checkbox"/> | <input type="checkbox"/> | <input type="checkbox"/> | <input type="checkbox"/> | <input type="checkbox"/> | <input type="checkbox"/> |

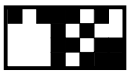

5147

Geef de belangrijkste sport (al dan niet in clubverband) die je tijdens je vrije tijd het meest beoefent.

**PAS OP!** De les lichamelijke opvoeding en sport op school tellen niet mee!

Ik beoefen geen sport

Mijn meest beoefende sport is \_\_\_\_\_

**Doe je deze sport elke week?**

Ja, elke week

Hoeveel keer per week? Plaats een kruisje in 1 vakje en vul ernaast in hoe lang je deze sport per keer doet

|                                                   |                                  |
|---------------------------------------------------|----------------------------------|
| <input type="checkbox"/> 1 keer per week          |                                  |
| <input type="checkbox"/> 2 keer per week          |                                  |
| <input type="checkbox"/> 3 keer per week          |                                  |
| <input type="checkbox"/> 4 keer per week          |                                  |
| <input type="checkbox"/> 5 keer per week          | _____ uur _____ minuten per keer |
| <input type="checkbox"/> 6 keer per week          |                                  |
| <input type="checkbox"/> 7 keer per week          |                                  |
| <input type="checkbox"/> Meer dan 7 keer per week |                                  |

Neen, niet elke week

Hoe vaak doe je deze sport? Plaats een kruisje in 1 vakje en vul ernaast in hoe lang je deze sport per keer doet

|                                                |                                  |
|------------------------------------------------|----------------------------------|
| <input type="checkbox"/> Enkele keren per jaar |                                  |
| <input type="checkbox"/> 1 keer per maand      |                                  |
| <input type="checkbox"/> 2 keer per maand      |                                  |
| <input type="checkbox"/> 3 keer per maand      | _____ uur _____ minuten per keer |

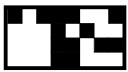

5147

**I) INFORMATIEF GEDEELTE****I1) Wat is jouw moedertaal? (gelieve 1 antwoord te geven)**

- Nederlands  
 Frans  
 Turks  
 Arabisch  
 Engels  
 Andere (noteer) \_\_\_\_\_

**I2) In welke onderwijsvorm volg je momenteel les?**

- Kunstsecundair onderwijs (KSO)  
 Beroepssecundair onderwijs (BSO)  
 Technisch secundair onderwijs (TSO)  
 Algemeen secundair onderwijs (ASO)

**Wat is het hoogst behaalde diploma of getuigschrift dat jouw ouders behaald hebben/of bezig zijn te behalen?**

| <b>VADER</b> (of inwonende partner van moeder)                                                                                                                                                                                                                                                                                                                                                                                                   | <b>MOEDER</b> (of inwonende partner van vader)                                                                                                                                                                                                                                                                                                                                                                                                   |
|--------------------------------------------------------------------------------------------------------------------------------------------------------------------------------------------------------------------------------------------------------------------------------------------------------------------------------------------------------------------------------------------------------------------------------------------------|--------------------------------------------------------------------------------------------------------------------------------------------------------------------------------------------------------------------------------------------------------------------------------------------------------------------------------------------------------------------------------------------------------------------------------------------------|
| <input type="checkbox"/> Niet van toepassing<br><input type="checkbox"/> Weet ik niet<br><input type="checkbox"/> Lager onderwijs<br><input type="checkbox"/> Beroeps secundair onderwijs (BSO)<br><input type="checkbox"/> Technisch secundair onderwijs (TSO)<br><input type="checkbox"/> Algemeen secundair onderwijs (ASO)<br><input type="checkbox"/> Hoger onderwijs, niet-universitair<br><input type="checkbox"/> Universitair onderwijs | <input type="checkbox"/> Niet van toepassing<br><input type="checkbox"/> Weet ik niet<br><input type="checkbox"/> Lager onderwijs<br><input type="checkbox"/> Beroeps secundair onderwijs (BSO)<br><input type="checkbox"/> Technisch secundair onderwijs (TSO)<br><input type="checkbox"/> Algemeen secundair onderwijs (ASO)<br><input type="checkbox"/> Hoger onderwijs, niet-universitair<br><input type="checkbox"/> Universitair onderwijs |

**I4) Wat is jouw lichaamslengte (cm)?** \_\_\_\_\_ cm**I5) Wat is jouw lichaamsgewicht (kg)?** \_\_\_\_\_ kg**I6) Hoeveel motorvoertuigen (wagens, moto's of brommers,...) die nog werken, zijn er aanwezig in jouw gezin? Gelieve de voertuigen waarvan je geen gebruik maakt OOK mee te rekenen.**

\_\_\_\_\_ (Noteer hier het aantal)

**BEDANKT!**
