# Supplementary material for: Reliability and validity of three questionnaires measuring context-specific sedentary behaviour and associated correlates in adolescents, adults and older adults
Source: PubMed Central journal article supplement (PMC4574538; doi:10.1186/s12966-015-0277-2), 2015-09-17
Supplement: 12966_2015_277_MOESM2_ESM.pdf [file 12966_2015_277_MOESM2_ESM.pdf]

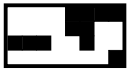

3300

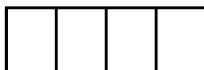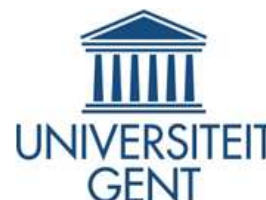

## **Vragenlijst voor inwoners van Sint-Niklaas**

### **Richtlijnen:**

Het is belangrijk elke vraag goed te lezen en te noteren hoe u zich persoonlijk voelt bij elke stelling. Verder dient deze vragenlijst zo correct mogelijk ingevuld te worden. De antwoorden worden vertrouwelijk verwerkt!

Tijdens het invullen van de vragenlijst dient u **rekening** te houden met volgende zaken:

- Gelieve telkens slechts **1 antwoord** aan te duiden (indien meerdere antwoorden mogelijk zijn, zal dit bij de vraag vermeld staan).
- Gelieve de vragenlijst in te vullen met een blauwe of zwarte balpen.
- Onder gezinsleden verstaan we: partner, kinderen, oudere inwonende personen,...
- Gelieve onderaan deze pagina uw handtekening (met datum) te plaatsen indien u wenst deel te nemen aan deze studie.
- De antwoordmogelijkheid "*niet van toepassing*" wil zeggen dat deze vraag voor u niet mogelijk is om in te vullen (bv. als u geen kinderen of geen partner heeft).
- Indien er een antwoord voluit geschreven moet worden, gelieve dit in **drukletters** te doen. Bij de andere vragen moet u een kruis ("X") in het vakje bij uw juiste antwoord plaatsen. Indien u een **antwoord wil veranderen**, laat de "X" staan bij het foute antwoord en maak het vakje met het juiste antwoord volledig zwart.
- Er zijn **GEEN** foute antwoorden!

Ik, ..... (**naam en voornaam**) ga akkoord, na het lezen van de informatiebrief, om deel te nemen aan de studie over zitten en licht intense activiteiten.

**Handtekening (met datum) voor akkoord:**

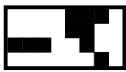

3300

## **A) ALGEMENE INFORMATIE**

**Gelieve onderstaande zaken in te vullen in drukletters (anonieme verwerking):**

- Initialen van voornaam en achternaam:
- Geboortedatum (dag/maand/jaar):  /  /
- Datum van vandaag (dag/maand/jaar):  /  /
- E-mail adres (indien mogelijk):
- \_\_\_\_\_

### **A1) Wat is uw geslacht?**

- Man                       Vrouw

### **A2) Bent u verhinderd om recht te staan (bv. een recente operatie, rugklachten,...)?**

- Ja ik kan niet rechtstaan     Neen ik kan rechtstaan

**Indien ja:** De vragenlijst is omwille van uw gezondheidstoestand niet van toepassing voor u. We willen u toch bedanken voor uw interesse! Gelieve deze vragenlijst ook in dit geval zeker op te sturen naar ons.

### **A3) Hoe kunt u uw huidige gezinssituatie het best omschrijven? (gelieve slechts 1 antwoord aan te duiden)**

- Vrijgezel
- Ik heb een partner, maar we wonen nog apart
- Samenwonend met partner
- Gehuwd
- Weduwe/weduwnaar

### **A4) Heeft u kinderen?**

- Neen
- Ja

**Indien ja,** hoeveel kinderen wonen er nog bij u thuis?     

### **A5) In welke omgeving woont u?**

- Op het platteland
- In een dorp/gemeente
- Aan de rand van de stad
- In een stad

### **A6) Bent u het afgelopen jaar verhuisd naar een ander adres?**

- Ja                               Neen

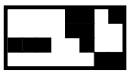

## **ZITTEN EN LICHT INTENSE ACTIVITEITEN**

Het is belangrijk dat u elke periode van zitten of liggen **slechts 1 keer** in rekening brengt. Indien u bijvoorbeeld 1 uur in de zetel zat om een boek te lezen terwijl u naar muziek luisterde, reken deze tijd dan als 1 uur lezen indien dit uw voornaamste bezigheid was. Reken deze tijd dan niet opnieuw als 1 uur muziek luisteren. Voor elke context dient u aan te duiden hoeveel tijd u hierin spendeerde de **afgelopen 7 dagen** en verder dient u ook uw mening te geven over verschillende situaties per context.

### **B) TELEVISIE (tv) KIJKEN IN DE VRIJE TIJD**

De volgende vragen gaan over zittend/liggend tv-kijken in uw vrije tijd. Met tv-kijken bedoelen we alle zaken (video's, films en gaming) die op tv worden afgespeeld. DVD's en films bekijken op uw computer worden ook als tv-kijken beschouwd. Onder gaming op tv verstaan we bijvoorbeeld het zittend spelen op de Playstation of Xbox.

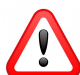

**Indien u geen tv kijkt in uw vrije tijd --> ga naar pagina 6: "C) computergebruik in de vrije tijd"**

**B1) Hoe lang zat u gemiddeld neer op één dag tijdens de laatste 7 dagen bij het kijken naar tv in de vrije tijd? Tv-kijken tijdens het eten valt ook hieronder. Beantwoord deze vragen afzonderlijk voor weekdag en weekenddag.**

| <b>tv-kijken</b>                               |                                                |
|------------------------------------------------|------------------------------------------------|
| <b>Weekdag</b>                                 | <b>Weekenddag</b>                              |
| <input type="checkbox"/> Niet                  | <input type="checkbox"/> Niet                  |
| <input type="checkbox"/> 1 tot 15 minuten/dag  | <input type="checkbox"/> 1 tot 15 minuten/dag  |
| <input type="checkbox"/> 15 tot 30 minuten/dag | <input type="checkbox"/> 15 tot 30 minuten/dag |
| <input type="checkbox"/> 30 tot 60 minuten/dag | <input type="checkbox"/> 30 tot 60 minuten/dag |
| <input type="checkbox"/> 1 tot 2 uren/dag      | <input type="checkbox"/> 1 tot 2 uren/dag      |
| <input type="checkbox"/> 2 tot 3 uren/dag      | <input type="checkbox"/> 2 tot 3 uren/dag      |
| <input type="checkbox"/> 3 tot 4 uren/dag      | <input type="checkbox"/> 3 tot 4 uren/dag      |
| <input type="checkbox"/> 4 tot 5 uren/dag      | <input type="checkbox"/> 4 tot 5 uren/dag      |
| <input type="checkbox"/> 5 tot 6 uren/dag      | <input type="checkbox"/> 5 tot 6 uren/dag      |
| <input type="checkbox"/> 6 tot 7 uren/dag      | <input type="checkbox"/> 6 tot 7 uren/dag      |
| <input type="checkbox"/> Meer dan 7 uren/dag   | <input type="checkbox"/> Meer dan 7 uren/dag   |

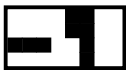

Geelieve aan te duiden in welke mate u akkoord gaat met elk van de onderstaande stellingen.

|                                                                                                  | Helemaal niet akkoord    | Eerder niet akkoord      | Neutraal                 | Eerder akkoord           | Helemaal akkoord         | Niet van toepassing      |
|--------------------------------------------------------------------------------------------------|--------------------------|--------------------------|--------------------------|--------------------------|--------------------------|--------------------------|
| B2) Ik vind tv-kijken leuk.                                                                      | <input type="checkbox"/> | <input type="checkbox"/> | <input type="checkbox"/> | <input type="checkbox"/> | <input type="checkbox"/> |                          |
| B3) Tv-kijken verhindert me om andere belangrijkere dingen te doen.                              | <input type="checkbox"/> | <input type="checkbox"/> | <input type="checkbox"/> | <input type="checkbox"/> | <input type="checkbox"/> |                          |
| B4) Ik kijk graag verschillende uren aan een stuk tv.                                            | <input type="checkbox"/> | <input type="checkbox"/> | <input type="checkbox"/> | <input type="checkbox"/> | <input type="checkbox"/> |                          |
| B5) Tv-kijken is mijn manier om te ontspannen na een werk- of schooldag.                         | <input type="checkbox"/> | <input type="checkbox"/> | <input type="checkbox"/> | <input type="checkbox"/> | <input type="checkbox"/> |                          |
| B6) Mijn gezinsleden vinden dat ik te veel tv kijk.                                              | <input type="checkbox"/> | <input type="checkbox"/> | <input type="checkbox"/> | <input type="checkbox"/> | <input type="checkbox"/> | <input type="checkbox"/> |
| B7) Ik vind van mezelf dat ik te veel tv kijk.                                                   | <input type="checkbox"/> | <input type="checkbox"/> | <input type="checkbox"/> | <input type="checkbox"/> | <input type="checkbox"/> |                          |
| B8) Ik zou het zien zitten om de tijd die ik tv kijk te verminderen.                             | <input type="checkbox"/> | <input type="checkbox"/> | <input type="checkbox"/> | <input type="checkbox"/> | <input type="checkbox"/> |                          |
| B9) Ik zou het zien zitten om tijdens het weekend overdag (tot 17 uur) <u>geen</u> tv te kijken. | <input type="checkbox"/> | <input type="checkbox"/> | <input type="checkbox"/> | <input type="checkbox"/> | <input type="checkbox"/> |                          |
| B10) Ik zou het zien zitten om de tv <u>niet</u> aan te zetten tijdens het eten.                 | <input type="checkbox"/> | <input type="checkbox"/> | <input type="checkbox"/> | <input type="checkbox"/> | <input type="checkbox"/> |                          |
| B11) Mijn gezinsleden moedigen me aan om minder tv te kijken.                                    | <input type="checkbox"/> | <input type="checkbox"/> | <input type="checkbox"/> | <input type="checkbox"/> | <input type="checkbox"/> | <input type="checkbox"/> |
| B12) Mijn vrienden moedigen me aan om minder tv te kijken.                                       | <input type="checkbox"/> | <input type="checkbox"/> | <input type="checkbox"/> | <input type="checkbox"/> | <input type="checkbox"/> |                          |

**B13) Ik denk dat volwassenen beter niet meer dan...**

- 30 minuten tv kijken per dag
- 1 uur tv kijken per dag
- 2 uur tv kijken per dag
- 3 uur tv kijken per dag
- 4 uur tv kijken per dag
- 5 uur tv kijken per dag

**B14) Waar staat het tv-toestel waar u het meest naar kijkt?** Geelieve slechts 1 antwoord te geven.

- In de keuken
- In de woonkamer
- In een aparte kamer
- In de slaapkamer
- In een andere kamer (noteer)

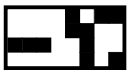

3300

**B15) Hoeveel tijd kijken uw gezinsleden gemiddeld naar tv?**

| Partner                                                | Kinderen die thuis wonen                               |
|--------------------------------------------------------|--------------------------------------------------------|
| <input type="checkbox"/> Niet van toepassing           | <input type="checkbox"/> Niet van toepassing           |
| <input type="checkbox"/> Kijkt geen tv                 | <input type="checkbox"/> Kijken geen tv                |
| <input type="checkbox"/> Slechts enkele keren per week | <input type="checkbox"/> Slechts enkele keren per week |
| <input type="checkbox"/> Minder dan 30 minuten/dag     | <input type="checkbox"/> Minder dan 30 minuten/dag     |
| <input type="checkbox"/> 30 tot 60 minuten/dag         | <input type="checkbox"/> 30 tot 60 minuten/dag         |
| <input type="checkbox"/> 1 tot 2 uur/dag               | <input type="checkbox"/> 1 tot 2 uur/dag               |
| <input type="checkbox"/> 2 tot 3 uur/dag               | <input type="checkbox"/> 2 tot 3 uur/dag               |
| <input type="checkbox"/> 3 tot 4 uur/dag               | <input type="checkbox"/> 3 tot 4 uur/dag               |
| <input type="checkbox"/> Meer dan 4 uur/dag            | <input type="checkbox"/> Meer dan 4 uur/dag            |

**B16) Hoe vaak kijkt u SAMEN met uw gezinsleden naar tv?**

| Partner                                      | Kinderen die thuis wonen                     |
|----------------------------------------------|----------------------------------------------|
| <input type="checkbox"/> Niet van toepassing | <input type="checkbox"/> Niet van toepassing |
| <input type="checkbox"/> Nooit               | <input type="checkbox"/> Nooit               |
| <input type="checkbox"/> Zelden              | <input type="checkbox"/> Zelden              |
| <input type="checkbox"/> Soms                | <input type="checkbox"/> Soms                |
| <input type="checkbox"/> Vaak                | <input type="checkbox"/> Vaak                |
| <input type="checkbox"/> Heel vaak           | <input type="checkbox"/> Heel vaak           |

Er zijn verschillende situaties waarin u uw zittend gedrag tijdens tv-kijken kan verminderen of (meer) kan onderbreken door even recht te staan. Duid voor elke stelling aan of u het zou zien zitten om volgende zaken uit te voeren.

| In welke mate zou u het zien zitten om:                                                                        | Ik zie dit helemaal niet zitten | Ik zie dit eerder niet zitten | Neutraal                 | Ik zie dit eerder wel zitten | Ik zie dit zeker zitten  |
|----------------------------------------------------------------------------------------------------------------|---------------------------------|-------------------------------|--------------------------|------------------------------|--------------------------|
| B17) taken rechtstaand uit te voeren terwijl u tv aan het kijken bent (zoals strijken, klusjes uitvoeren,...). | <input type="checkbox"/>        | <input type="checkbox"/>      | <input type="checkbox"/> | <input type="checkbox"/>     | <input type="checkbox"/> |
| B18) een uur tv-kijken te vervangen door lichte inspanningen (vb: kuisen, klusjes).                            | <input type="checkbox"/>        | <input type="checkbox"/>      | <input type="checkbox"/> | <input type="checkbox"/>     | <input type="checkbox"/> |
| B19) tijdens de reclame op tv kort recht te staan.                                                             | <input type="checkbox"/>        | <input type="checkbox"/>      | <input type="checkbox"/> | <input type="checkbox"/>     | <input type="checkbox"/> |

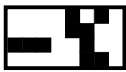

3300

## C) COMPUTERGEBRUIK IN DE VRIJE TIJD

De volgende vragen gaan over uw zittend computergebruik in de vrije tijd. De tijd die u voor het werk of thuis voor uw job aan de computer doorbrengt, telt hier **NIET** mee. Met computergebruik bedoelen we: E-mailen, websites bezoeken, chatten, sociale netwerksites (facebook,...) bezoeken, spelletjes spelen,... Belangrijk is dat u hier ook rekening houdt met het gebruik van **tablets** (handcomputer zoals iPad). Ook internetgebruik op een **smartphone** valt hieronder.

 Indien u bovenstaande zaken (computer, tablet en smartphone) niet gebruikt in uw vrije tijd --> ga naar pagina 8: "D) *gemotoriseerd transport als woon-werkverplaatsing en in de vrije tijd*"

**C1) Hoe lang zat u gemiddeld neer op één dag tijdens de laatste 7 dagen bij het gebruik van de computer in de vrije tijd? Beantwoord deze vraag afzonderlijk voor weekdag en weekenddag.**

| Computer gebruiken in de vrije tijd            |                                                |
|------------------------------------------------|------------------------------------------------|
| Weekdag                                        | Weekenddag                                     |
| <input type="checkbox"/> Niet                  | <input type="checkbox"/> Niet                  |
| <input type="checkbox"/> 1 tot 15 minuten/dag  | <input type="checkbox"/> 1 tot 15 minuten/dag  |
| <input type="checkbox"/> 15 tot 30 minuten/dag | <input type="checkbox"/> 15 tot 30 minuten/dag |
| <input type="checkbox"/> 30 tot 60 minuten/dag | <input type="checkbox"/> 30 tot 60 minuten/dag |
| <input type="checkbox"/> 1 tot 2 uren/dag      | <input type="checkbox"/> 1 tot 2 uren/dag      |
| <input type="checkbox"/> 2 tot 3 uren/dag      | <input type="checkbox"/> 2 tot 3 uren/dag      |
| <input type="checkbox"/> 3 tot 4 uren/dag      | <input type="checkbox"/> 3 tot 4 uren/dag      |
| <input type="checkbox"/> 4 tot 5 uren/dag      | <input type="checkbox"/> 4 tot 5 uren/dag      |
| <input type="checkbox"/> 5 tot 6 uren/dag      | <input type="checkbox"/> 5 tot 6 uren/dag      |
| <input type="checkbox"/> 6 tot 7 uren/dag      | <input type="checkbox"/> 6 tot 7 uren/dag      |
| <input type="checkbox"/> Meer dan 7 uren/dag   | <input type="checkbox"/> Meer dan 7 uren/dag   |

**C2) Hoeveel tijd gebruiken uw gezinsleden gemiddeld een computer (denk aan tablets, internet op smartphone, laptop, computer,...) in hun VRIJE TIJD?**

| Partner                                                | Kinderen die thuis wonen                               |
|--------------------------------------------------------|--------------------------------------------------------|
| <input type="checkbox"/> Niet van toepassing           | <input type="checkbox"/> Niet van toepassing           |
| <input type="checkbox"/> Gebruikt geen computer        | <input type="checkbox"/> Gebruiken geen computer       |
| <input type="checkbox"/> Slechts enkele keren per week | <input type="checkbox"/> Slechts enkele keren per week |
| <input type="checkbox"/> Minder dan 30 minuten/dag     | <input type="checkbox"/> Minder dan 30 minuten/dag     |
| <input type="checkbox"/> 30 tot 60 minuten/dag         | <input type="checkbox"/> 30 tot 60 minuten/dag         |
| <input type="checkbox"/> 1 tot 2 uur/dag               | <input type="checkbox"/> 1 tot 2 uur/dag               |
| <input type="checkbox"/> 2 tot 3 uur/dag               | <input type="checkbox"/> 2 tot 3 uur/dag               |
| <input type="checkbox"/> 3 tot 4 uur/dag               | <input type="checkbox"/> 3 tot 4 uur/dag               |
| <input type="checkbox"/> Meer dan 4 uur/dag            | <input type="checkbox"/> Meer dan 4 uur/dag            |

**C3) Hoe vaak gebruikt u een computer en dit op hetzelfde moment wanneer een gezinslid in dezelfde ruimte een andere computer gebruikt (in VRIJE TIJD)?**

| Partner                                      | Kinderen die thuis wonen                     |
|----------------------------------------------|----------------------------------------------|
| <input type="checkbox"/> Niet van toepassing | <input type="checkbox"/> Niet van toepassing |
| <input type="checkbox"/> Nooit               | <input type="checkbox"/> Nooit               |
| <input type="checkbox"/> Zelden              | <input type="checkbox"/> Zelden              |
| <input type="checkbox"/> Soms                | <input type="checkbox"/> Soms                |
| <input type="checkbox"/> Vaak                | <input type="checkbox"/> Vaak                |
| <input type="checkbox"/> Heel vaak           | <input type="checkbox"/> Heel vaak           |

Er zijn verschillende situaties waarin u uw zittend gedrag tijdens computergebruik in de vrije tijd kan verminderen of (meer) kan onderbreken door even recht te staan. Duid voor elke stelling aan of u het zou zien zitten om volgende zaken uit te voeren.

| In welke mate zou u het zien zitten om:                                                   | Ik zie dit helemaal niet zitten | Ik zie dit eerder niet zitten | Neutraal                 | Ik zie dit eerder wel zitten | Ik zie dit zeker zitten  |
|-------------------------------------------------------------------------------------------|---------------------------------|-------------------------------|--------------------------|------------------------------|--------------------------|
| C4) rechtstaand de computer te gebruiken.                                                 | <input type="checkbox"/>        | <input type="checkbox"/>      | <input type="checkbox"/> | <input type="checkbox"/>     | <input type="checkbox"/> |
| C5) een uur computergebruik te vervangen door lichte inspanningen (vb: kuisen, klusjes).  | <input type="checkbox"/>        | <input type="checkbox"/>      | <input type="checkbox"/> | <input type="checkbox"/>     | <input type="checkbox"/> |
| C6) na 30 minuten de computer te hebben gebruikt gedurende enkele minuten recht te staan. | <input type="checkbox"/>        | <input type="checkbox"/>      | <input type="checkbox"/> | <input type="checkbox"/>     | <input type="checkbox"/> |

Gelieve aan te duiden in welke mate u akkoord gaat met elk van de volgende stellingen over computergebruik in de vrije tijd.

|                                                                                                                  | Helemaal niet akkoord    | Eerder niet akkoord      | Neutraal                 | Eerder akkoord           | Helemaal akkoord         | Niet van toepassing      |
|------------------------------------------------------------------------------------------------------------------|--------------------------|--------------------------|--------------------------|--------------------------|--------------------------|--------------------------|
| C7) Ik vind het leuk om in de vrije tijd de computer te gebruiken.                                               | <input type="checkbox"/> | <input type="checkbox"/> | <input type="checkbox"/> | <input type="checkbox"/> | <input type="checkbox"/> |                          |
| C8) De computer gebruiken verhindert me belangrijkere zaken te doen.                                             | <input type="checkbox"/> | <input type="checkbox"/> | <input type="checkbox"/> | <input type="checkbox"/> | <input type="checkbox"/> |                          |
| C9) Ik vind het plezierig gedurende een lange tijd de computer te gebruiken.                                     | <input type="checkbox"/> | <input type="checkbox"/> | <input type="checkbox"/> | <input type="checkbox"/> | <input type="checkbox"/> |                          |
| C10) De computer gebruiken is mijn manier om te ontspannen na een werk- of schooldag.                            | <input type="checkbox"/> | <input type="checkbox"/> | <input type="checkbox"/> | <input type="checkbox"/> | <input type="checkbox"/> |                          |
| C11) Mijn gezinsleden vinden dat ik te veel de computer gebruik.                                                 | <input type="checkbox"/> | <input type="checkbox"/> | <input type="checkbox"/> | <input type="checkbox"/> | <input type="checkbox"/> | <input type="checkbox"/> |
| C12) Ik vind van mezelf dat ik te veel de computer gebruik.                                                      | <input type="checkbox"/> | <input type="checkbox"/> | <input type="checkbox"/> | <input type="checkbox"/> | <input type="checkbox"/> |                          |
| C13) Ik zou het zien zitten om de computer gedurende enkele dagen in de week niet te gebruiken in de vrije tijd. | <input type="checkbox"/> | <input type="checkbox"/> | <input type="checkbox"/> | <input type="checkbox"/> | <input type="checkbox"/> |                          |
| C14) Ik zou het zien zitten om de tijd die ik spendeer aan computergebruik te verminderen in de vrije tijd.      | <input type="checkbox"/> | <input type="checkbox"/> | <input type="checkbox"/> | <input type="checkbox"/> | <input type="checkbox"/> |                          |
| C15) Mijn gezinsleden moedigen me aan om minder de computer te gebruiken in de vrije tijd.                       | <input type="checkbox"/> | <input type="checkbox"/> | <input type="checkbox"/> | <input type="checkbox"/> | <input type="checkbox"/> | <input type="checkbox"/> |
| C16) Mijn vrienden moedigen me aan om minder de computer te gebruiken in de vrije tijd.                          | <input type="checkbox"/> | <input type="checkbox"/> | <input type="checkbox"/> | <input type="checkbox"/> | <input type="checkbox"/> |                          |

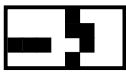

3300

## D) GEMOTORISEERD TRANSPORT ALS WOON-WERKVERPLAATSING EN IN DE VRIJE TIJD

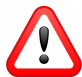

- 1) Personen die nog studeren noteren de tijd die ze nodig hebben om naar hun **school/opleiding** te gaan.
- 2) Onder gemotoriseerd transport verstaan we: auto, brommer, moto, trein, tram of bus.
- 3) Indien u **nooit** één van bovenstaande vervoersmiddelen gebruikt dan mag u verder naar pagina 12: " E) Zitten op het werk ".

### VERPLAATSINGEN VAN & NAAR HET WERK

**D1) Hoe lang zat u gemiddeld op één dag tijdens de laatste 7 dagen bij verplaatsingen van en naar uw werk/school? Denk aan het gebruik van een brommer, auto, bus, trein, tram of moto; reken fietsen niet mee.**

- |                                                 |                                                  |
|-------------------------------------------------|--------------------------------------------------|
| <input type="checkbox"/> Niet                   | <input type="checkbox"/> 2 tot 2.5 uren/dag      |
| <input type="checkbox"/> 1 tot 15 minuten/dag   | <input type="checkbox"/> 2.5 tot 3 uren/dag      |
| <input type="checkbox"/> 15 tot 30 minuten/dag  | <input type="checkbox"/> 3 tot 4 uren/dag        |
| <input type="checkbox"/> 30 tot 45 minuten/dag  | <input type="checkbox"/> 4 tot 5 uren/dag        |
| <input type="checkbox"/> 45 tot 60 minuten/dag  | <input type="checkbox"/> 5 tot 6 uren/dag        |
| <input type="checkbox"/> 60 tot 90 minuten/dag  | <input type="checkbox"/> 6 tot 7 uren/dag        |
| <input type="checkbox"/> 90 tot 120 minuten/dag | <input type="checkbox"/> Meer dan 7 uren per dag |

### VERPLAATSINGEN TIJDENS HET WERK

**D2) Hoe lang zat u gemiddeld op één dag tijdens de laatste 7 dagen bij verplaatsingen als deel van uw werk (= tijdens werkuren)? Denk aan het gebruik van een brommer, auto, bus, trein, tram of moto; reken fietsen niet mee.**

- |                                                 |                                                  |
|-------------------------------------------------|--------------------------------------------------|
| <input type="checkbox"/> Niet                   | <input type="checkbox"/> 2 tot 2.5 uren/dag      |
| <input type="checkbox"/> 1 tot 15 minuten/dag   | <input type="checkbox"/> 2.5 tot 3 uren/dag      |
| <input type="checkbox"/> 15 tot 30 minuten/dag  | <input type="checkbox"/> 3 tot 4 uren/dag        |
| <input type="checkbox"/> 30 tot 45 minuten/dag  | <input type="checkbox"/> 4 tot 5 uren/dag        |
| <input type="checkbox"/> 45 tot 60 minuten/dag  | <input type="checkbox"/> 5 tot 6 uren/dag        |
| <input type="checkbox"/> 60 tot 90 minuten/dag  | <input type="checkbox"/> 6 tot 7 uren/dag        |
| <input type="checkbox"/> 90 tot 120 minuten/dag | <input type="checkbox"/> Meer dan 7 uren per dag |

### VERPLAATSINGEN IN DE VRIJE TIJD

**D3) Hoe lang zat u gemiddeld op één dag tijdens de laatste 7 dagen bij verplaatsingen BUITEN uw werk/school. Hou hier dus rekening met uw transport in de vrije tijd (vb. naar winkel, vrienden opzoeken,...). Denk aan het gebruik van een auto, bus, trein, tram, moto of brommer; reken opnieuw fietsen niet mee.**

| Weekdag                                          | Weekenddag                                       |
|--------------------------------------------------|--------------------------------------------------|
| <input type="checkbox"/> Niet                    | <input type="checkbox"/> Niet                    |
| <input type="checkbox"/> 1 tot 15 minuten/dag    | <input type="checkbox"/> 1 tot 15 minuten/dag    |
| <input type="checkbox"/> 15 tot 30 minuten/dag   | <input type="checkbox"/> 15 tot 30 minuten/dag   |
| <input type="checkbox"/> 30 tot 45 minuten/dag   | <input type="checkbox"/> 30 tot 45 minuten/dag   |
| <input type="checkbox"/> 45 tot 60 minuten/dag   | <input type="checkbox"/> 45 tot 60 minuten/dag   |
| <input type="checkbox"/> 60 tot 90 minuten/dag   | <input type="checkbox"/> 60 tot 90 minuten/dag   |
| <input type="checkbox"/> 90 tot 120 minuten/dag  | <input type="checkbox"/> 90 tot 120 minuten/dag  |
| <input type="checkbox"/> 2 tot 2.5 uren/dag      | <input type="checkbox"/> 2 tot 2.5 uren/dag      |
| <input type="checkbox"/> 2.5 tot 3 uren/dag      | <input type="checkbox"/> 2.5 tot 3 uren/dag      |
| <input type="checkbox"/> 3 tot 4 uren/dag        | <input type="checkbox"/> 3 tot 4 uren/dag        |
| <input type="checkbox"/> 4 tot 5 uren/dag        | <input type="checkbox"/> 4 tot 5 uren/dag        |
| <input type="checkbox"/> 5 tot 6 uren/dag        | <input type="checkbox"/> 5 tot 6 uren/dag        |
| <input type="checkbox"/> 6 tot 7 uren/dag        | <input type="checkbox"/> 6 tot 7 uren/dag        |
| <input type="checkbox"/> Meer dan 7 uren per dag | <input type="checkbox"/> Meer dan 7 uren per dag |



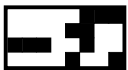

3300

D4) Gelieve aan te geven hoeveel tijd u gemiddeld per dag spendeerde aan wandelen op een rustig tempo (bv: slenteren) als deel van uw transport (bv. naar werk wandelen, naar bus wandelen, naar winkel wandelen,...) tijdens de laatste 7 dagen.

| Weekdag                                        | Weekenddag                                     |
|------------------------------------------------|------------------------------------------------|
| <input type="checkbox"/> Niet                  | <input type="checkbox"/> Niet                  |
| <input type="checkbox"/> 1 tot 15 minuten/dag  | <input type="checkbox"/> 1 tot 15 minuten/dag  |
| <input type="checkbox"/> 15 tot 30 minuten/dag | <input type="checkbox"/> 15 tot 30 minuten/dag |
| <input type="checkbox"/> 30 tot 45 minuten/dag | <input type="checkbox"/> 30 tot 45 minuten/dag |
| <input type="checkbox"/> 45 tot 60 minuten/dag | <input type="checkbox"/> 45 tot 60 minuten/dag |
| <input type="checkbox"/> 1 tot 2 uur/dag       | <input type="checkbox"/> 1 tot 2 uur/dag       |
| <input type="checkbox"/> Meer dan 2 uur/dag    | <input type="checkbox"/> Meer dan 2 uur/dag    |

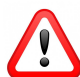

Voor onderstaande vragen wordt er onder transport steeds het gebruik van gemotoriseerde vervoersmiddelen verstaan (auto, brommer, moto, trein, tram of bus). Om de vragen te beantwoorden dient u rekening te houden met uw transport in de vrije tijd (naar winkel,...) EN uw transport naar werk/school.

Gelieve aan te duiden in welke mate u akkoord gaat met elk van onderstaande stellingen.

|                                                                                                                         | Helemaal niet akkoord    | Eerder niet akkoord      | Neutraal                 | Eerder akkoord           | Helemaal akkoord         | Niet van toepassing      |
|-------------------------------------------------------------------------------------------------------------------------|--------------------------|--------------------------|--------------------------|--------------------------|--------------------------|--------------------------|
| D5) Ik voel me lui als ik op mijn bestemming aankom na mijn gemotoriseerd transport.                                    | <input type="checkbox"/> | <input type="checkbox"/> | <input type="checkbox"/> | <input type="checkbox"/> | <input type="checkbox"/> |                          |
| D6) Ik vind het leuk om me met een gemotoriseerd voertuig te verplaatsen.                                               | <input type="checkbox"/> | <input type="checkbox"/> | <input type="checkbox"/> | <input type="checkbox"/> | <input type="checkbox"/> |                          |
| D7) Ik vind het leuk om als passagier tijdens gemotoriseerd transport aan bepaalde zaken te werken of uit te rusten.    | <input type="checkbox"/> | <input type="checkbox"/> | <input type="checkbox"/> | <input type="checkbox"/> | <input type="checkbox"/> |                          |
| D8) Ik vind van mezelf dat ik te veel gebruik maak van gemotoriseerd transport.                                         | <input type="checkbox"/> | <input type="checkbox"/> | <input type="checkbox"/> | <input type="checkbox"/> | <input type="checkbox"/> |                          |
| D9) Ik zou het zien zitten om spontaan een halte vroeger uit te stappen in tram/bus en het resterende eind te wandelen. | <input type="checkbox"/> | <input type="checkbox"/> | <input type="checkbox"/> | <input type="checkbox"/> | <input type="checkbox"/> |                          |
| D10) Ik zou het zien zitten om me spontaan wat verder te parkeren met de auto en het resterende eind te wandelen.       | <input type="checkbox"/> | <input type="checkbox"/> | <input type="checkbox"/> | <input type="checkbox"/> | <input type="checkbox"/> |                          |
| D11) Ik zou het zien zitten om spontaan de fiets te nemen of te wandelen ook al heb ik een auto ter beschikking.        | <input type="checkbox"/> | <input type="checkbox"/> | <input type="checkbox"/> | <input type="checkbox"/> | <input type="checkbox"/> |                          |
| D12) Mijn gezinsleden moedigen me aan om me op een (meer) actieve manier (fietsen, wandelen) te verplaatsen.            | <input type="checkbox"/> | <input type="checkbox"/> | <input type="checkbox"/> | <input type="checkbox"/> | <input type="checkbox"/> | <input type="checkbox"/> |
| D13) Mijn vrienden moedigen me aan om me op een (meer) actieve manier (fietsen, wandelen) te verplaatsen.               | <input type="checkbox"/> | <input type="checkbox"/> | <input type="checkbox"/> | <input type="checkbox"/> | <input type="checkbox"/> |                          |
| D14) Mijn gezinsleden vinden dat ik te veel gebruik maak van gemotoriseerd transport.                                   | <input type="checkbox"/> | <input type="checkbox"/> | <input type="checkbox"/> | <input type="checkbox"/> | <input type="checkbox"/> | <input type="checkbox"/> |

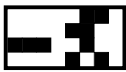

**D15) Wat zijn voor u de voornaamste redenen om u niet actief (wandelen of fietsen) te verplaatsen? Meerdere antwoorden zijn mogelijk.**

- De omgeving is niet veilig om te wandelen of te fietsen
- Actief transport (wandelen of fietsen) is niet aantrekkelijk (geen groene omgeving in de buurt, saai,...)
- Actief transport is vermoeiend (zweeten, bagage dragen,...)
- De voorzieningen voor gemotoriseerd transport zijn goed uitgerust (bushaltes dicht bij de deur,...)
- Tijdsdruk
- Te grote afstand
- Weersomstandigheden
- Het combineren van verschillende taken (naar bakker, kinderen ergens afzetten,...)
- Financiële redenen (terugbetaling kilometers van trein, tram, bus of auto via het werk)
- Andere (noteer) \_\_\_\_\_

**D16) Hoe verplaatsen uw gezinsleden zich meestal... (slechts 1 antwoord mogelijk per rij)**

**a) naar het werk of school?**

|                          | Niet van toepassing      | Gemotoriseerd transport  | Actief transport (wandelen/fietsen) |
|--------------------------|--------------------------|--------------------------|-------------------------------------|
| Partner                  | <input type="checkbox"/> | <input type="checkbox"/> | <input type="checkbox"/>            |
| Kinderen die thuis wonen | <input type="checkbox"/> | <input type="checkbox"/> | <input type="checkbox"/>            |

**b) in de vrije tijd?**

|                          | Niet van toepassing      | Gemotoriseerd transport  | Actief transport (wandelen/fietsen) |
|--------------------------|--------------------------|--------------------------|-------------------------------------|
| Partner                  | <input type="checkbox"/> | <input type="checkbox"/> | <input type="checkbox"/>            |
| Kinderen die thuis wonen | <input type="checkbox"/> | <input type="checkbox"/> | <input type="checkbox"/>            |

Er zijn verschillende situaties waarin u uw zittend gedrag tijdens gemotoriseerd transport kan verminderen of (meer) kan onderbreken door even recht te staan. Duid voor elke stelling aan of u het zou zien zitten om volgende zaken uit te voeren.

| In welke mate zou u het zien zitten om:                                             | Ik zie dit helemaal niet zitten | Ik zie dit eerder niet zitten | Neutraal                 | Ik zie dit eerder wel zitten | Ik zie dit zeker zitten  |
|-------------------------------------------------------------------------------------|---------------------------------|-------------------------------|--------------------------|------------------------------|--------------------------|
| D17) spontaan recht te staan op de bus, trein of tram in plaats van neer te zitten. | <input type="checkbox"/>        | <input type="checkbox"/>      | <input type="checkbox"/> | <input type="checkbox"/>     | <input type="checkbox"/> |
| D18) na 30 minuten zitten in bus, trein of tram even kort te gaan rechtstaan.       | <input type="checkbox"/>        | <input type="checkbox"/>      | <input type="checkbox"/> | <input type="checkbox"/>     | <input type="checkbox"/> |

Geef over onderstaande beweringen uw mening i.v.m. de omgeving waarin u zich begeeft tijdens uw gemotoriseerd transport. Beoordeel hier de omgeving op ongeveer 10 à 15 minuten wandelen of op 1 km van uw woning.

|                                                                                                                                    | Helemaal niet akkoord    | Eerder niet akkoord      | Neutraal                 | Eerder akkoord           | Helemaal akkoord         |
|------------------------------------------------------------------------------------------------------------------------------------|--------------------------|--------------------------|--------------------------|--------------------------|--------------------------|
| D19) Als ik me buitenshuis begeef naar openbare plaatsen (winkels/station/...) kan ik gemakkelijk parkeren.                        | <input type="checkbox"/> | <input type="checkbox"/> | <input type="checkbox"/> | <input type="checkbox"/> | <input type="checkbox"/> |
| D20) Via informatieborden langs de weg en/of radio krijg ik veel info over zittende activiteiten zoals cinema of sportwedstrijden. | <input type="checkbox"/> | <input type="checkbox"/> | <input type="checkbox"/> | <input type="checkbox"/> | <input type="checkbox"/> |

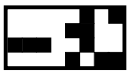

D21) Hoe vaak verplaatst u zich **SAMEN met uw gezinsleden met gemotoriseerd transport**? Doe dit apart voor transport van/naar het werk of school en transport in de vrije tijd (afzonderlijk voor weekdag en weekenddag).

| Van/naar het werk of school                                                                                                                                                                                               |                                                                                                                                                                                                                           |
|---------------------------------------------------------------------------------------------------------------------------------------------------------------------------------------------------------------------------|---------------------------------------------------------------------------------------------------------------------------------------------------------------------------------------------------------------------------|
| Partner                                                                                                                                                                                                                   | Kinderen die thuis wonen                                                                                                                                                                                                  |
| <input type="checkbox"/> Niet van toepassing<br><input type="checkbox"/> Nooit<br><input type="checkbox"/> Zelden<br><input type="checkbox"/> Soms<br><input type="checkbox"/> Vaak<br><input type="checkbox"/> Heel vaak | <input type="checkbox"/> Niet van toepassing<br><input type="checkbox"/> Nooit<br><input type="checkbox"/> Zelden<br><input type="checkbox"/> Soms<br><input type="checkbox"/> Vaak<br><input type="checkbox"/> Heel vaak |

| Vrije tijd                                                                                                                                                                                                                |                                                                                                                                                                                                                           |                                                                                                                                                                                                                           |                                                                                                                                                                                                                           |
|---------------------------------------------------------------------------------------------------------------------------------------------------------------------------------------------------------------------------|---------------------------------------------------------------------------------------------------------------------------------------------------------------------------------------------------------------------------|---------------------------------------------------------------------------------------------------------------------------------------------------------------------------------------------------------------------------|---------------------------------------------------------------------------------------------------------------------------------------------------------------------------------------------------------------------------|
| Partner                                                                                                                                                                                                                   |                                                                                                                                                                                                                           | Kinderen die thuis wonen                                                                                                                                                                                                  |                                                                                                                                                                                                                           |
| Weekdag                                                                                                                                                                                                                   | Weekenddag                                                                                                                                                                                                                | Weekdag                                                                                                                                                                                                                   | Weekenddag                                                                                                                                                                                                                |
| <input type="checkbox"/> Niet van toepassing<br><input type="checkbox"/> Nooit<br><input type="checkbox"/> Zelden<br><input type="checkbox"/> Soms<br><input type="checkbox"/> Vaak<br><input type="checkbox"/> Heel vaak | <input type="checkbox"/> Niet van toepassing<br><input type="checkbox"/> Nooit<br><input type="checkbox"/> Zelden<br><input type="checkbox"/> Soms<br><input type="checkbox"/> Vaak<br><input type="checkbox"/> Heel vaak | <input type="checkbox"/> Niet van toepassing<br><input type="checkbox"/> Nooit<br><input type="checkbox"/> Zelden<br><input type="checkbox"/> Soms<br><input type="checkbox"/> Vaak<br><input type="checkbox"/> Heel vaak | <input type="checkbox"/> Niet van toepassing<br><input type="checkbox"/> Nooit<br><input type="checkbox"/> Zelden<br><input type="checkbox"/> Soms<br><input type="checkbox"/> Vaak<br><input type="checkbox"/> Heel vaak |

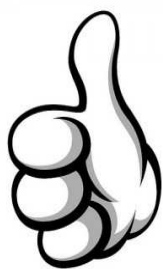

**U bent al voorbij de helft van de vragen**

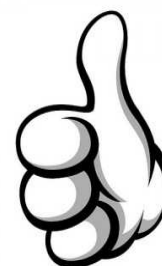

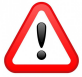

Indien u momenteel geen werk hebt (bv: studenten, werkzoekenden,...), dan mag u de vragen in dit deel overslaan en verder gaan naar pagina 15: "*F) Huishoudelijke bezigheden en telefoneren*".

### E1) Hoeveel tijd bracht u per dag gemiddeld al zittend door op het werk tijdens de laatste 7 dagen?

| Minder dan 2 uur per dag | 2 tot 3 uur/dag          | 3 tot 4 uur/dag          | 4 tot 5 uur/dag          | 5 tot 6 uur/dag          | 6 tot 7uur/dag           | 7 tot 8uur/dag           | Meer dan 8 uur per dag   |
|--------------------------|--------------------------|--------------------------|--------------------------|--------------------------|--------------------------|--------------------------|--------------------------|
| <input type="checkbox"/> | <input type="checkbox"/> | <input type="checkbox"/> | <input type="checkbox"/> | <input type="checkbox"/> | <input type="checkbox"/> | <input type="checkbox"/> | <input type="checkbox"/> |

De volgende stellingen zijn verschillende meningen over uw zittend gedrag op het werk. Gelieve aan te duiden in welke mate u akkoord gaat met elk van de onderstaande stellingen.

|                                                                                                            | Helemaal niet akkoord    | Eerder niet akkoord      | Neutraal                 | Eerder akkoord           | Helemaal akkoord         | Niet van toepassing      |
|------------------------------------------------------------------------------------------------------------|--------------------------|--------------------------|--------------------------|--------------------------|--------------------------|--------------------------|
| E2) Mijn aandacht neemt af wanneer ik gedurende een lange tijd neerzit.                                    | <input type="checkbox"/> | <input type="checkbox"/> | <input type="checkbox"/> | <input type="checkbox"/> | <input type="checkbox"/> |                          |
| E3) Ik vind het plezant om langdurig neer te zitten tijdens mijn werkuren.                                 | <input type="checkbox"/> | <input type="checkbox"/> | <input type="checkbox"/> | <input type="checkbox"/> | <input type="checkbox"/> |                          |
| E4) Zitten op het werk is een ideale gelegenheid om uit te rusten.                                         | <input type="checkbox"/> | <input type="checkbox"/> | <input type="checkbox"/> | <input type="checkbox"/> | <input type="checkbox"/> |                          |
| E5) Mijn collega's vinden dat ik te veel zit.                                                              | <input type="checkbox"/> | <input type="checkbox"/> | <input type="checkbox"/> | <input type="checkbox"/> | <input type="checkbox"/> | <input type="checkbox"/> |
| E6) Ik vind van mezelf dat ik te veel zit op mijn werk.                                                    | <input type="checkbox"/> | <input type="checkbox"/> | <input type="checkbox"/> | <input type="checkbox"/> | <input type="checkbox"/> |                          |
| E7) Ik zou het zien zitten om bepaalde taken (telefoneren,...) rechtstaand uit te voeren.                  | <input type="checkbox"/> | <input type="checkbox"/> | <input type="checkbox"/> | <input type="checkbox"/> | <input type="checkbox"/> |                          |
| E8) Ik zou het zien zitten om na lang zitten even recht te staan.                                          | <input type="checkbox"/> | <input type="checkbox"/> | <input type="checkbox"/> | <input type="checkbox"/> | <input type="checkbox"/> |                          |
| E9) Ik zou het zien zitten om meer recht te staan tijdens de pauzes.                                       | <input type="checkbox"/> | <input type="checkbox"/> | <input type="checkbox"/> | <input type="checkbox"/> | <input type="checkbox"/> |                          |
| E10) Mijn collega's moedigen me aan om minder te zitten.                                                   | <input type="checkbox"/> | <input type="checkbox"/> | <input type="checkbox"/> | <input type="checkbox"/> | <input type="checkbox"/> | <input type="checkbox"/> |
| E11) Mijn collega's op mijn bureau en/of afdeling staan regelmatig recht tijdens de werkuren en/of pauzes. | <input type="checkbox"/> | <input type="checkbox"/> | <input type="checkbox"/> | <input type="checkbox"/> | <input type="checkbox"/> | <input type="checkbox"/> |

### E12) Indien u een vraag heeft voor een collega op een ander bureau, wat doet u dan meestal? (gelieve slechts 1 antwoord te geven)

- Ik ga persoonlijk naar mijn collega
- Ik stuur een E-mail
- Ik telefoneer naar mijn collega
- Ik gebruik een intern chatsysteem op het werk
- Niet van toepassing (bv. zelfstandig, niet werken op een bureau,...)

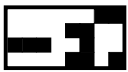**E13) Hoeveel personen zitten er op uw bureau, uzelf ook meegerekend?**

- Alleen mezelf  
 2 personen  
 3 personen  
 4 personen  
 Meer dan 4 personen

**Beantwoord volgende vragen omtrent uw werk.**

|                                                                                                    | Ja                       | Neen                     |
|----------------------------------------------------------------------------------------------------|--------------------------|--------------------------|
| E14) Op mijn werk zijn er fietsen ter beschikking gesteld door mijn werkgever                      | <input type="checkbox"/> | <input type="checkbox"/> |
| E15) Op mijn werk kan ik genieten van een terugbetaling van openbaar vervoer en/of fietsvergoeding | <input type="checkbox"/> | <input type="checkbox"/> |
| E16) De (bureau)stoelen zijn comfortabel.                                                          | <input type="checkbox"/> | <input type="checkbox"/> |
| E17) Er is een ruime en/of makkelijke parking aanwezig.                                            | <input type="checkbox"/> | <input type="checkbox"/> |
| E18) Er is een fietsstalling aanwezig.                                                             | <input type="checkbox"/> | <input type="checkbox"/> |
| E19) Er zijn standing desks aanwezig (verhoogde bureaus waaraan rechtstaand gewerkt kan worden).   | <input type="checkbox"/> | <input type="checkbox"/> |

**Er zijn verschillende situaties waarin u uw zittend gedrag op uw werk kan verminderen of (meer) kan onderbreken door even recht te staan. Duid voor elke stelling aan of u het zou zien zitten om volgende zaken uit te voeren.**

| In welke mate zou u het zien zitten om:                                                              | Ik zie dit helemaal niet zitten | Ik zie dit eerder niet zitten | Neutraal                 | Ik zie dit eerder wel zitten | Ik zie dit zeker zitten  |
|------------------------------------------------------------------------------------------------------|---------------------------------|-------------------------------|--------------------------|------------------------------|--------------------------|
| E20) rechtstaand te werken aan uw bureau.                                                            | <input type="checkbox"/>        | <input type="checkbox"/>      | <input type="checkbox"/> | <input type="checkbox"/>     | <input type="checkbox"/> |
| E21) rechtstaand te telefoneren.                                                                     | <input type="checkbox"/>        | <input type="checkbox"/>      | <input type="checkbox"/> | <input type="checkbox"/>     | <input type="checkbox"/> |
| E22) in plaats van te telefoneren naar een collega, er zelf naar toe te gaan.                        | <input type="checkbox"/>        | <input type="checkbox"/>      | <input type="checkbox"/> | <input type="checkbox"/>     | <input type="checkbox"/> |
| E23) na 30 minuten zitten enkele minuten recht te staan.                                             | <input type="checkbox"/>        | <input type="checkbox"/>      | <input type="checkbox"/> | <input type="checkbox"/>     | <input type="checkbox"/> |
| E24) toestellen te verplaatsen zodat u moet recht staan om deze te bedienen (printer, telefoon,...). | <input type="checkbox"/>        | <input type="checkbox"/>      | <input type="checkbox"/> | <input type="checkbox"/>     | <input type="checkbox"/> |

**Duid aan in welke mate u akkoord gaat met volgende stellingen.**

|                                                                                                     | Helemaal niet akkoord    | Eerder niet akkoord      | Neutraal                 | Eerder akkoord           | Helemaal akkoord         | Niet van toepassing      |
|-----------------------------------------------------------------------------------------------------|--------------------------|--------------------------|--------------------------|--------------------------|--------------------------|--------------------------|
| <b>Zittende activiteiten onderbreken door recht te staan op mijn werk zie ik als:</b>               |                          |                          |                          |                          |                          |                          |
| E25) storend voor collega's                                                                         | <input type="checkbox"/> | <input type="checkbox"/> | <input type="checkbox"/> | <input type="checkbox"/> | <input type="checkbox"/> | <input type="checkbox"/> |
| E26) belachelijk                                                                                    | <input type="checkbox"/> | <input type="checkbox"/> | <input type="checkbox"/> | <input type="checkbox"/> | <input type="checkbox"/> |                          |
| E27) goed voor mijn gezondheid                                                                      | <input type="checkbox"/> | <input type="checkbox"/> | <input type="checkbox"/> | <input type="checkbox"/> | <input type="checkbox"/> |                          |
| <b>Ik ben er zeker van dat ik (meer) kan rechtstaan als onderbreking tijdens mijn werk, ook al:</b> |                          |                          |                          |                          |                          |                          |
| E28) doen mijn collega's dit niet                                                                   | <input type="checkbox"/> | <input type="checkbox"/> | <input type="checkbox"/> | <input type="checkbox"/> | <input type="checkbox"/> | <input type="checkbox"/> |
| E29) word ik niet gesteund door mijn collega's                                                      | <input type="checkbox"/> | <input type="checkbox"/> | <input type="checkbox"/> | <input type="checkbox"/> | <input type="checkbox"/> | <input type="checkbox"/> |

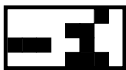

3300

Geef aan hoe u het liefst onderstaande taken op het werk zou uitvoeren.

|                      | Rechtstaand              | Zittend                  |
|----------------------|--------------------------|--------------------------|
| E30) Telefoneren     | <input type="checkbox"/> | <input type="checkbox"/> |
| E31) Kort vergaderen | <input type="checkbox"/> | <input type="checkbox"/> |
| E32) Bureauwerk      | <input type="checkbox"/> | <input type="checkbox"/> |
| E33) Koffie pauzes   | <input type="checkbox"/> | <input type="checkbox"/> |
| E34) Middagpauzes    | <input type="checkbox"/> | <input type="checkbox"/> |

E35) Gelieve aan te geven hoeveel tijd u gemiddeld per dag spendeerde aan de onderstaande activiteiten/situaties op het werk tijdens de laatste 7 dagen.

Rechtstaand werken= rechtstaand vergaderen/telefoneren/brainstormen/computer gebruiken/...

| Rechtstaand werken                             | Wandelen aan rustig tempo (bv slenteren)        |
|------------------------------------------------|-------------------------------------------------|
| <input type="checkbox"/> Niet                  | <input type="checkbox"/> Niet                   |
| <input type="checkbox"/> 1 tot 15 minuten/dag  | <input type="checkbox"/> 1 tot 15 minuten/dag   |
| <input type="checkbox"/> 15 tot 30 minuten/dag | <input type="checkbox"/> 15 tot 30 minuten/dag  |
| <input type="checkbox"/> 30 tot 45 minuten/dag | <input type="checkbox"/> 30 tot 45 minuten/dag  |
| <input type="checkbox"/> 45 tot 60 minuten/dag | <input type="checkbox"/> 45 tot 60 minuten/dag  |
| <input type="checkbox"/> 1 tot 2 uren/dag      | <input type="checkbox"/> 1 tot 2 uren/dag       |
| <input type="checkbox"/> 2 tot 3 uren/dag      | <input type="checkbox"/> Meer dan dan 2 uur/dag |
| <input type="checkbox"/> 3 tot 4 uren/dag      |                                                 |
| <input type="checkbox"/> 4 tot 5 uren/dag      |                                                 |
| <input type="checkbox"/> 5 tot 6 uren/dag      |                                                 |
| <input type="checkbox"/> 6 tot 7 uren/dag      |                                                 |
| <input type="checkbox"/> Meer dan 7 uren/dag   |                                                 |

Beantwoord onderstaande vragen omtrent uw werk.

|                                                                                                                                                           | Zeker akkoord            | Akkoord                  | Niet akkoord             | Zeker niet akkoord       | Niet van toepassing      |
|-----------------------------------------------------------------------------------------------------------------------------------------------------------|--------------------------|--------------------------|--------------------------|--------------------------|--------------------------|
| E36) Ik kan verschillende collega's zien zitten of staan aan hun bureau wanneer ik aan mijn bureau zit (reken hier geen bureaus mee met gesloten deuren). | <input type="checkbox"/> | <input type="checkbox"/> | <input type="checkbox"/> | <input type="checkbox"/> | <input type="checkbox"/> |
| E37) Ik kom regelmatig collega's tegen wanneer ik door de gangen wandel in mijn gebouw.                                                                   | <input type="checkbox"/> | <input type="checkbox"/> | <input type="checkbox"/> | <input type="checkbox"/> | <input type="checkbox"/> |
| E38) Ik zie regelmatig collega's die aan het wandelen zijn in ons gebouw.                                                                                 | <input type="checkbox"/> | <input type="checkbox"/> | <input type="checkbox"/> | <input type="checkbox"/> | <input type="checkbox"/> |
| E39) Ik zie regelmatig collega's die rechtstaan en aan het praten zijn in ons gebouw.                                                                     | <input type="checkbox"/> | <input type="checkbox"/> | <input type="checkbox"/> | <input type="checkbox"/> | <input type="checkbox"/> |

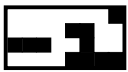

3300

**F) HUISHOUDELIJKE BEZIGHEDEN EN TELEFONEREN**

F1) Hoeveel tijd bracht u gemiddeld per dag al zittend door tijdens huishoudelijke taken en thuis telefoneren tijdens de laatste 7 dagen? Mogelijke huishoudelijke taken zijn: koken, strijken, herstellingen uitvoeren,...

| Zittend huishoudelijke taken doen (koken, herstellingen,...) & telefoneren |                                                |
|----------------------------------------------------------------------------|------------------------------------------------|
| <u>Weekdag</u>                                                             | <u>Weekenddag</u>                              |
| <input type="checkbox"/> Niet                                              | <input type="checkbox"/> Niet                  |
| <input type="checkbox"/> 1 tot 15 minuten/dag                              | <input type="checkbox"/> 1 tot 15 minuten/dag  |
| <input type="checkbox"/> 15 tot 30 minuten/dag                             | <input type="checkbox"/> 15 tot 30 minuten/dag |
| <input type="checkbox"/> 30 tot 60 minuten/dag                             | <input type="checkbox"/> 30 tot 60 minuten/dag |
| <input type="checkbox"/> 1 tot 2 uren/dag                                  | <input type="checkbox"/> 1 tot 2 uren/dag      |
| <input type="checkbox"/> 2 tot 3 uren/dag                                  | <input type="checkbox"/> 2 tot 3 uren/dag      |
| <input type="checkbox"/> 3 tot 4 uren/dag                                  | <input type="checkbox"/> 3 tot 4 uren/dag      |
| <input type="checkbox"/> 4 tot 5 uren/dag                                  | <input type="checkbox"/> 4 tot 5 uren/dag      |
| <input type="checkbox"/> 5 tot 6 uren/dag                                  | <input type="checkbox"/> 5 tot 6 uren/dag      |
| <input type="checkbox"/> 6 tot 7 uren/dag                                  | <input type="checkbox"/> 6 tot 7 uren/dag      |
| <input type="checkbox"/> Meer dan 7 uren/dag                               | <input type="checkbox"/> Meer dan 7 uren/dag   |

De volgende stellingen zijn verschillende meningen over zittende activiteiten in het huishouden en thuis telefoneren. Gelieve aan te duiden in welke mate u akkoord gaat met elk van de onderstaande stellingen.

|                                                                                        | Helemaal niet akkoord    | Eerder niet akkoord      | Neutraal                 | Eerder akkoord           | Helemaal akkoord         | Niet van toepassing      |
|----------------------------------------------------------------------------------------|--------------------------|--------------------------|--------------------------|--------------------------|--------------------------|--------------------------|
| F2) Ik vind het leuk om te zitten tijdens huishoudelijke taken.                        | <input type="checkbox"/> | <input type="checkbox"/> | <input type="checkbox"/> | <input type="checkbox"/> | <input type="checkbox"/> |                          |
| F3) Wanneer ik zittend werk in het huishouden kan ik sneller werken.                   | <input type="checkbox"/> | <input type="checkbox"/> | <input type="checkbox"/> | <input type="checkbox"/> | <input type="checkbox"/> |                          |
| F4) Ik zou liever meer rechtstaan tijdens huishoudelijke taken.                        | <input type="checkbox"/> | <input type="checkbox"/> | <input type="checkbox"/> | <input type="checkbox"/> | <input type="checkbox"/> |                          |
| F5) Ik vind van mezelf dat ik meer kan rechtstaan tijdens huishoudelijke taken.        | <input type="checkbox"/> | <input type="checkbox"/> | <input type="checkbox"/> | <input type="checkbox"/> | <input type="checkbox"/> |                          |
| F6) Ik zou het zien zitten om rechtstaand te telefoneren.                              | <input type="checkbox"/> | <input type="checkbox"/> | <input type="checkbox"/> | <input type="checkbox"/> | <input type="checkbox"/> |                          |
| F7) Ik zou het zien zitten om taken in de keuken rechtstaand uit te voeren.            | <input type="checkbox"/> | <input type="checkbox"/> | <input type="checkbox"/> | <input type="checkbox"/> | <input type="checkbox"/> |                          |
| F8) Mijn gezinsleden moedigen me aan om minder te zitten tijdens huishoudelijke taken. | <input type="checkbox"/> | <input type="checkbox"/> | <input type="checkbox"/> | <input type="checkbox"/> | <input type="checkbox"/> | <input type="checkbox"/> |
| F9) Huishoudelijke taken worden door mijn kinderen meestal zittend uitgevoerd.         | <input type="checkbox"/> | <input type="checkbox"/> | <input type="checkbox"/> | <input type="checkbox"/> | <input type="checkbox"/> | <input type="checkbox"/> |
| F10) Huishoudelijke taken worden door mijn partner meestal zittend uitgevoerd.         | <input type="checkbox"/> | <input type="checkbox"/> | <input type="checkbox"/> | <input type="checkbox"/> | <input type="checkbox"/> | <input type="checkbox"/> |

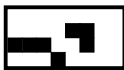

3300

Geef aan hoe u het liefst onderstaande huishoudelijke taken zou uitvoeren.

|                                            | Rechtstaand              | Zittend                  |
|--------------------------------------------|--------------------------|--------------------------|
| F11) Telefoneren                           | <input type="checkbox"/> | <input type="checkbox"/> |
| F12) Aardappelen schillen/groenten snijden | <input type="checkbox"/> | <input type="checkbox"/> |
| F13) Strijken                              | <input type="checkbox"/> | <input type="checkbox"/> |
| F14) Was opvouwen                          | <input type="checkbox"/> | <input type="checkbox"/> |
| F15) Tanden poetsen                        | <input type="checkbox"/> | <input type="checkbox"/> |
| F16) Herstellingen uitvoeren               | <input type="checkbox"/> | <input type="checkbox"/> |

Er zijn verschillende situaties waarin u uw zittend gedrag in het huishouden kan verminderen of (meer) kan onderbreken door even recht te staan. Duid voor elke stelling aan of u het zou zien zitten om volgende zaken uit te voeren.

| In welke mate zou u het zien zitten om:                                                                                | Ik zie dit helemaal niet zitten | Ik zie dit eerder niet zitten | Neutraal                 | Ik zie dit eerder wel zitten | Ik zie dit zeker zitten  |
|------------------------------------------------------------------------------------------------------------------------|---------------------------------|-------------------------------|--------------------------|------------------------------|--------------------------|
| F17) meer huishoudelijke taken rechtstaand uit te voeren.                                                              | <input type="checkbox"/>        | <input type="checkbox"/>      | <input type="checkbox"/> | <input type="checkbox"/>     | <input type="checkbox"/> |
| F18) toestellen te verplaatsen zodat u moet rechtstaan om deze te kunnen bedienen (printer, afstandsbediening tv,...). | <input type="checkbox"/>        | <input type="checkbox"/>      | <input type="checkbox"/> | <input type="checkbox"/>     | <input type="checkbox"/> |

Duid aan in welke mate u akkoord gaat met volgende stellingen.

|                                                                                                  | Helemaal niet akkoord    | Eerder niet akkoord      | Neutraal                 | Eerder akkoord           | Helemaal akkoord         | Niet van toepassing      |
|--------------------------------------------------------------------------------------------------|--------------------------|--------------------------|--------------------------|--------------------------|--------------------------|--------------------------|
| <b>Ik ben er zeker van dat ik mijn zittende activiteiten thuis meer kan onderbreken, ook al:</b> |                          |                          |                          |                          |                          |                          |
| F19) doen mijn gezinsleden dit niet.                                                             | <input type="checkbox"/> | <input type="checkbox"/> | <input type="checkbox"/> | <input type="checkbox"/> | <input type="checkbox"/> | <input type="checkbox"/> |
| F20) steunen/begrijpen mijn gezinsleden mij niet.                                                | <input type="checkbox"/> | <input type="checkbox"/> | <input type="checkbox"/> | <input type="checkbox"/> | <input type="checkbox"/> | <input type="checkbox"/> |

Hoe bekijkt u de nabije omgeving van uw woonplaats (binnen een straal van 1 km of op 10-15 minuten wandelen)?

|                                                                                                | Helemaal niet akkoord    | Eerder niet akkoord      | Neutraal                 | Eerder akkoord           | Helemaal akkoord         |
|------------------------------------------------------------------------------------------------|--------------------------|--------------------------|--------------------------|--------------------------|--------------------------|
| F21) De meeste woningen in mijn buurt zijn alleenstaande woningen (open bebouwing).            | <input type="checkbox"/> | <input type="checkbox"/> | <input type="checkbox"/> | <input type="checkbox"/> | <input type="checkbox"/> |
| F22) Er zijn veel winkels op wandelafstand van mijn huis.                                      | <input type="checkbox"/> | <input type="checkbox"/> | <input type="checkbox"/> | <input type="checkbox"/> | <input type="checkbox"/> |
| F23) Er is een halte van het openbaar vervoer (bus en/of tram) op wandelafstand van mijn huis. | <input type="checkbox"/> | <input type="checkbox"/> | <input type="checkbox"/> | <input type="checkbox"/> | <input type="checkbox"/> |
| F24) Er is een park op wandelafstand van mijn huis.                                            | <input type="checkbox"/> | <input type="checkbox"/> | <input type="checkbox"/> | <input type="checkbox"/> | <input type="checkbox"/> |
| F25) Wandelen is gevaarlijk omwille van het verkeer in mijn buurt.                             | <input type="checkbox"/> | <input type="checkbox"/> | <input type="checkbox"/> | <input type="checkbox"/> | <input type="checkbox"/> |
| F26) Wandelen in mijn buurt is gevaarlijk omwille van de hoge kans op misdaad.                 | <input type="checkbox"/> | <input type="checkbox"/> | <input type="checkbox"/> | <input type="checkbox"/> | <input type="checkbox"/> |
| F27) In mijn buurt staan er bomen langs de straten.                                            | <input type="checkbox"/> | <input type="checkbox"/> | <input type="checkbox"/> | <input type="checkbox"/> | <input type="checkbox"/> |
| F28) Ik vind mijn buurt een goede plaats om in te leven.                                       | <input type="checkbox"/> | <input type="checkbox"/> | <input type="checkbox"/> | <input type="checkbox"/> | <input type="checkbox"/> |
| F29) De omgeving nodigt <u>niet</u> uit om te bewegen (veel heuvels, geen voetpad,...).        | <input type="checkbox"/> | <input type="checkbox"/> | <input type="checkbox"/> | <input type="checkbox"/> | <input type="checkbox"/> |



Geleef het aantal niet draagbare toestellen te noteren die aanwezig zijn bij u thuis EN waarvan u ZELF ook gebruik maakt.

|                                                         | Geen                     | 1                        | 2                        | 3                        | 4                        | 5                        | Meer dan 5               |
|---------------------------------------------------------|--------------------------|--------------------------|--------------------------|--------------------------|--------------------------|--------------------------|--------------------------|
| F30) Televisies MET betaalzers                          | <input type="checkbox"/> | <input type="checkbox"/> | <input type="checkbox"/> | <input type="checkbox"/> | <input type="checkbox"/> | <input type="checkbox"/> | <input type="checkbox"/> |
| F31) Televisies ZONDER betaalzers                       | <input type="checkbox"/> | <input type="checkbox"/> | <input type="checkbox"/> | <input type="checkbox"/> | <input type="checkbox"/> | <input type="checkbox"/> | <input type="checkbox"/> |
| F32) Videospelers/Dvd-spelers                           | <input type="checkbox"/> | <input type="checkbox"/> | <input type="checkbox"/> | <input type="checkbox"/> | <input type="checkbox"/> | <input type="checkbox"/> | <input type="checkbox"/> |
| F33) Muziekinstallaties (radio, CD-spelers, stereo,...) | <input type="checkbox"/> | <input type="checkbox"/> | <input type="checkbox"/> | <input type="checkbox"/> | <input type="checkbox"/> | <input type="checkbox"/> | <input type="checkbox"/> |
| F34) Computer (vaste)                                   | <input type="checkbox"/> | <input type="checkbox"/> | <input type="checkbox"/> | <input type="checkbox"/> | <input type="checkbox"/> | <input type="checkbox"/> | <input type="checkbox"/> |
| F35) Spelconsoles op tv (Playstation, Xbox,...)         | <input type="checkbox"/> | <input type="checkbox"/> | <input type="checkbox"/> | <input type="checkbox"/> | <input type="checkbox"/> | <input type="checkbox"/> | <input type="checkbox"/> |
| F36) Telefoontoestellen (vaste lijn)                    | <input type="checkbox"/> | <input type="checkbox"/> | <input type="checkbox"/> | <input type="checkbox"/> | <input type="checkbox"/> | <input type="checkbox"/> | <input type="checkbox"/> |

Hoeveel van bovenstaande toestellen bevinden zich in uw slaapkamer?

|                                                         | Geen                     | 1                        | 2                        | 3                        | 4                        | 5                        | Meer dan 5               |
|---------------------------------------------------------|--------------------------|--------------------------|--------------------------|--------------------------|--------------------------|--------------------------|--------------------------|
| F37) Televisies MET betaalzers                          | <input type="checkbox"/> | <input type="checkbox"/> | <input type="checkbox"/> | <input type="checkbox"/> | <input type="checkbox"/> | <input type="checkbox"/> | <input type="checkbox"/> |
| F38) Televisies ZONDER betaalzers                       | <input type="checkbox"/> | <input type="checkbox"/> | <input type="checkbox"/> | <input type="checkbox"/> | <input type="checkbox"/> | <input type="checkbox"/> | <input type="checkbox"/> |
| F39) Videospelers/Dvd-spelers                           | <input type="checkbox"/> | <input type="checkbox"/> | <input type="checkbox"/> | <input type="checkbox"/> | <input type="checkbox"/> | <input type="checkbox"/> | <input type="checkbox"/> |
| F40) Muziekinstallaties (radio, CD-spelers, stereo,...) | <input type="checkbox"/> | <input type="checkbox"/> | <input type="checkbox"/> | <input type="checkbox"/> | <input type="checkbox"/> | <input type="checkbox"/> | <input type="checkbox"/> |
| F41) Computer (vaste)                                   | <input type="checkbox"/> | <input type="checkbox"/> | <input type="checkbox"/> | <input type="checkbox"/> | <input type="checkbox"/> | <input type="checkbox"/> | <input type="checkbox"/> |
| F42) Spelconsoles op tv (Playstation, Xbox,...)         | <input type="checkbox"/> | <input type="checkbox"/> | <input type="checkbox"/> | <input type="checkbox"/> | <input type="checkbox"/> | <input type="checkbox"/> | <input type="checkbox"/> |
| F43) Telefoontoestellen (vaste lijn)                    | <input type="checkbox"/> | <input type="checkbox"/> | <input type="checkbox"/> | <input type="checkbox"/> | <input type="checkbox"/> | <input type="checkbox"/> | <input type="checkbox"/> |

Geleef het aantal draagbare toestellen te noteren die aanwezig zijn bij u thuis EN waarvan u ZELF ook gebruik maakt.

|                                             | Geen                     | 1                        | 2                        | 3                        | 4                        | 5                        | Meer dan 5               |
|---------------------------------------------|--------------------------|--------------------------|--------------------------|--------------------------|--------------------------|--------------------------|--------------------------|
| F44) Laptop                                 | <input type="checkbox"/> | <input type="checkbox"/> | <input type="checkbox"/> | <input type="checkbox"/> | <input type="checkbox"/> | <input type="checkbox"/> | <input type="checkbox"/> |
| F45) GSM (geen smartphone)                  | <input type="checkbox"/> | <input type="checkbox"/> | <input type="checkbox"/> | <input type="checkbox"/> | <input type="checkbox"/> | <input type="checkbox"/> | <input type="checkbox"/> |
| F46) Smartphone                             | <input type="checkbox"/> | <input type="checkbox"/> | <input type="checkbox"/> | <input type="checkbox"/> | <input type="checkbox"/> | <input type="checkbox"/> | <input type="checkbox"/> |
| F47) Muziekspelers (zoals iPod, MP3,...)    | <input type="checkbox"/> | <input type="checkbox"/> | <input type="checkbox"/> | <input type="checkbox"/> | <input type="checkbox"/> | <input type="checkbox"/> | <input type="checkbox"/> |
| F48) Spelconsoles (zoals PSP, game boy,...) | <input type="checkbox"/> | <input type="checkbox"/> | <input type="checkbox"/> | <input type="checkbox"/> | <input type="checkbox"/> | <input type="checkbox"/> | <input type="checkbox"/> |
| F49) Tablet (iPad, Samsung Galaxy Tab,...)  | <input type="checkbox"/> | <input type="checkbox"/> | <input type="checkbox"/> | <input type="checkbox"/> | <input type="checkbox"/> | <input type="checkbox"/> | <input type="checkbox"/> |

Hoe beoordeelt u volgende beweringen omtrent de voorzieningen bij u thuis?

|                                                                                              | Helemaal niet akkoord    | Eerder niet akkoord      | Neutraal                 | Eerder akkoord           | Helemaal akkoord         | Niet van toepassing      |
|----------------------------------------------------------------------------------------------|--------------------------|--------------------------|--------------------------|--------------------------|--------------------------|--------------------------|
| F50) De afstandsbediening van de tv ligt steeds binnen handbereik wanneer ik deze nodig heb. | <input type="checkbox"/> | <input type="checkbox"/> | <input type="checkbox"/> | <input type="checkbox"/> | <input type="checkbox"/> | <input type="checkbox"/> |
| F51) De zetels bij ons thuis zijn comfortabel om gedurende een lange tijd in te zitten.      | <input type="checkbox"/> | <input type="checkbox"/> | <input type="checkbox"/> | <input type="checkbox"/> | <input type="checkbox"/> | <input type="checkbox"/> |

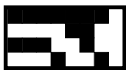

Gelieve aan te geven hoeveel tijd u gemiddeld per dag spendeerde aan de onderstaande rechtstaande activiteiten/situaties in het huishouden tijdens de laatste 7 dagen.

| Voorbeelden van licht intense activiteiten in het huishouden (RECHTstaand uitgevoerd) |            |                                                 |                          |                          |                          |                          |                          |                          |
|---------------------------------------------------------------------------------------|------------|-------------------------------------------------|--------------------------|--------------------------|--------------------------|--------------------------|--------------------------|--------------------------|
| Afstoffen                                                                             |            | Aankleden/uitkleden                             |                          |                          |                          |                          |                          |                          |
| Koken                                                                                 |            | Spelen met kinderen (rustig)                    |                          |                          |                          |                          |                          |                          |
| Strijken                                                                              |            | Eten opdienen                                   |                          |                          |                          |                          |                          |                          |
| Afwassen, tafel opruimen                                                              |            | Dieren eten geven                               |                          |                          |                          |                          |                          |                          |
| Planten water geven                                                                   |            | Persoonlijke hygiëne (scheren, make-up,...)     |                          |                          |                          |                          |                          |                          |
| Rechtstaand telefoneren                                                               |            | De was doen, kleren ophangen voor te drogen,... |                          |                          |                          |                          |                          |                          |
|                                                                                       |            | Niet                                            | 1 tot 15<br>minuten/dag  | 15 tot 30<br>minuten/dag | 30 tot 45<br>minuten/dag | 45 tot 60<br>minuten/dag | 1 tot 2<br>uur/dag       | Meer dan 2<br>uur/dag    |
| HUISHOUDEN (RECHTSTAAND UITGEVOERD)                                                   |            |                                                 |                          |                          |                          |                          |                          |                          |
| F52) Kuisen<br>(afstoffen,<br>strijken,...)                                           | weekdag    | <input type="checkbox"/>                        | <input type="checkbox"/> | <input type="checkbox"/> | <input type="checkbox"/> | <input type="checkbox"/> | <input type="checkbox"/> | <input type="checkbox"/> |
|                                                                                       | weekenddag | <input type="checkbox"/>                        | <input type="checkbox"/> | <input type="checkbox"/> | <input type="checkbox"/> | <input type="checkbox"/> | <input type="checkbox"/> | <input type="checkbox"/> |
| F53) Keuken<br>(koken,<br>voorbereiding,...)                                          | weekdag    | <input type="checkbox"/>                        | <input type="checkbox"/> | <input type="checkbox"/> | <input type="checkbox"/> | <input type="checkbox"/> | <input type="checkbox"/> | <input type="checkbox"/> |
|                                                                                       | weekenddag | <input type="checkbox"/>                        | <input type="checkbox"/> | <input type="checkbox"/> | <input type="checkbox"/> | <input type="checkbox"/> | <input type="checkbox"/> | <input type="checkbox"/> |
| F54) Kinderen<br>(rustig samen<br>spelen,...)                                         | weekdag    | <input type="checkbox"/>                        | <input type="checkbox"/> | <input type="checkbox"/> | <input type="checkbox"/> | <input type="checkbox"/> | <input type="checkbox"/> | <input type="checkbox"/> |
|                                                                                       | weekenddag | <input type="checkbox"/>                        | <input type="checkbox"/> | <input type="checkbox"/> | <input type="checkbox"/> | <input type="checkbox"/> | <input type="checkbox"/> | <input type="checkbox"/> |
| TUIN (RECHTSTAAND UITGEVOERD)                                                         |            |                                                 |                          |                          |                          |                          |                          |                          |
| F55) Planten<br>water geven,<br>dieren eten<br>geven,...                              | weekdag    | <input type="checkbox"/>                        | <input type="checkbox"/> | <input type="checkbox"/> | <input type="checkbox"/> | <input type="checkbox"/> | <input type="checkbox"/> | <input type="checkbox"/> |
|                                                                                       | weekenddag | <input type="checkbox"/>                        | <input type="checkbox"/> | <input type="checkbox"/> | <input type="checkbox"/> | <input type="checkbox"/> | <input type="checkbox"/> | <input type="checkbox"/> |
| VERZORGING (RECHTSTAAND UITGEVOERD)                                                   |            |                                                 |                          |                          |                          |                          |                          |                          |
| F56) Verzorging<br>(wassen, scheren,<br>make-up, tanden<br>poetsen,...)               | weekdag    | <input type="checkbox"/>                        | <input type="checkbox"/> | <input type="checkbox"/> | <input type="checkbox"/> | <input type="checkbox"/> | <input type="checkbox"/> | <input type="checkbox"/> |
|                                                                                       | weekenddag | <input type="checkbox"/>                        | <input type="checkbox"/> | <input type="checkbox"/> | <input type="checkbox"/> | <input type="checkbox"/> | <input type="checkbox"/> | <input type="checkbox"/> |
| VRIJE TIJD/HOBBY'S (RECHTSTAAND UITGEVOERD)                                           |            |                                                 |                          |                          |                          |                          |                          |                          |
| F57) Winkelen,<br>staand tv-kijken,<br>staand muziek<br>luisteren,...                 | weekdag    | <input type="checkbox"/>                        | <input type="checkbox"/> | <input type="checkbox"/> | <input type="checkbox"/> | <input type="checkbox"/> | <input type="checkbox"/> | <input type="checkbox"/> |
|                                                                                       | weekenddag | <input type="checkbox"/>                        | <input type="checkbox"/> | <input type="checkbox"/> | <input type="checkbox"/> | <input type="checkbox"/> | <input type="checkbox"/> | <input type="checkbox"/> |
| WANDELEN OP RUSTIG TEMPO (bv. slenteren)                                              |            |                                                 |                          |                          |                          |                          |                          |                          |
| F58) Wandelen<br>op rustig tempo<br>(bv. slenteren) <u>in<br/>huis</u>                | weekdag    | <input type="checkbox"/>                        | <input type="checkbox"/> | <input type="checkbox"/> | <input type="checkbox"/> | <input type="checkbox"/> | <input type="checkbox"/> | <input type="checkbox"/> |
|                                                                                       | weekenddag | <input type="checkbox"/>                        | <input type="checkbox"/> | <input type="checkbox"/> | <input type="checkbox"/> | <input type="checkbox"/> | <input type="checkbox"/> | <input type="checkbox"/> |

## G) ANDERE ZITTENDE/LIGGENDE ACTIVITEITEN

Hoe lang zat u gemiddeld op één dag tijdens de laatste 7 dagen voor de volgende zittende activiteiten? Onder zittende activiteiten worden ook liggende activiteiten verstaan. Elke periode van zitten of liggen mag slechts **1 keer in rekening** worden gebracht. Indien u bv. 1 uur in de zetel zat om een boek te lezen terwijl u naar muziek luisterde, reken deze tijd dan als 1 uur lezen indien dit uw voornaamste bezigheid was. Reken deze tijd dan niet opnieuw als 1 uur naar muziek luisteren!

|                                                                                          |            | Niet                     | 1 tot 15<br>minuten<br>per dag | 15 tot<br>30<br>minuten<br>per dag | 30 tot 60<br>minuten<br>per dag | 1 tot 2<br>uur per<br>dag | 2 tot 3<br>uur per<br>dag | 3 tot 4<br>uur per<br>dag | 4 tot 5<br>uur per<br>dag | 5 tot 6<br>uur per<br>dag | 6 tot 7<br>uur per<br>dag | Meer<br>dan 7<br>uur per<br>dag |
|------------------------------------------------------------------------------------------|------------|--------------------------|--------------------------------|------------------------------------|---------------------------------|---------------------------|---------------------------|---------------------------|---------------------------|---------------------------|---------------------------|---------------------------------|
| <b>G1) Zittend lezen</b><br>(boek, tijdschrift,<br>krant,...)                            | weekdag    | <input type="checkbox"/> | <input type="checkbox"/>       | <input type="checkbox"/>           | <input type="checkbox"/>        | <input type="checkbox"/>  | <input type="checkbox"/>  | <input type="checkbox"/>  | <input type="checkbox"/>  | <input type="checkbox"/>  | <input type="checkbox"/>  | <input type="checkbox"/>        |
|                                                                                          | weekenddag | <input type="checkbox"/> | <input type="checkbox"/>       | <input type="checkbox"/>           | <input type="checkbox"/>        | <input type="checkbox"/>  | <input type="checkbox"/>  | <input type="checkbox"/>  | <input type="checkbox"/>  | <input type="checkbox"/>  | <input type="checkbox"/>  | <input type="checkbox"/>        |
| <b>G2) Zittend<br/>zorgen</b> voor<br>kinderen,<br>familieleden,....                     | weekdag    | <input type="checkbox"/> | <input type="checkbox"/>       | <input type="checkbox"/>           | <input type="checkbox"/>        | <input type="checkbox"/>  | <input type="checkbox"/>  | <input type="checkbox"/>  | <input type="checkbox"/>  | <input type="checkbox"/>  | <input type="checkbox"/>  | <input type="checkbox"/>        |
|                                                                                          | weekenddag | <input type="checkbox"/> | <input type="checkbox"/>       | <input type="checkbox"/>           | <input type="checkbox"/>        | <input type="checkbox"/>  | <input type="checkbox"/>  | <input type="checkbox"/>  | <input type="checkbox"/>  | <input type="checkbox"/>  | <input type="checkbox"/>  | <input type="checkbox"/>        |
| <b>G3) Zitten bij<br/>hobby's</b><br>(tekenen,<br>kaarten,...)                           | weekdag    | <input type="checkbox"/> | <input type="checkbox"/>       | <input type="checkbox"/>           | <input type="checkbox"/>        | <input type="checkbox"/>  | <input type="checkbox"/>  | <input type="checkbox"/>  | <input type="checkbox"/>  | <input type="checkbox"/>  | <input type="checkbox"/>  | <input type="checkbox"/>        |
|                                                                                          | weekenddag | <input type="checkbox"/> | <input type="checkbox"/>       | <input type="checkbox"/>           | <input type="checkbox"/>        | <input type="checkbox"/>  | <input type="checkbox"/>  | <input type="checkbox"/>  | <input type="checkbox"/>  | <input type="checkbox"/>  | <input type="checkbox"/>  | <input type="checkbox"/>        |
| <b>G4) Zitten bij<br/>sociaal contact</b><br>(vrienden<br>bezoeken, café,<br>cinema,.... | weekdag    | <input type="checkbox"/> | <input type="checkbox"/>       | <input type="checkbox"/>           | <input type="checkbox"/>        | <input type="checkbox"/>  | <input type="checkbox"/>  | <input type="checkbox"/>  | <input type="checkbox"/>  | <input type="checkbox"/>  | <input type="checkbox"/>  | <input type="checkbox"/>        |
|                                                                                          | weekenddag | <input type="checkbox"/> | <input type="checkbox"/>       | <input type="checkbox"/>           | <input type="checkbox"/>        | <input type="checkbox"/>  | <input type="checkbox"/>  | <input type="checkbox"/>  | <input type="checkbox"/>  | <input type="checkbox"/>  | <input type="checkbox"/>  | <input type="checkbox"/>        |
| <b>G5) Zittend naar<br/>muziek luisteren</b><br>(radio, CD,<br>iPod,...)                 | weekdag    | <input type="checkbox"/> | <input type="checkbox"/>       | <input type="checkbox"/>           | <input type="checkbox"/>        | <input type="checkbox"/>  | <input type="checkbox"/>  | <input type="checkbox"/>  | <input type="checkbox"/>  | <input type="checkbox"/>  | <input type="checkbox"/>  | <input type="checkbox"/>        |
|                                                                                          | weekenddag | <input type="checkbox"/> | <input type="checkbox"/>       | <input type="checkbox"/>           | <input type="checkbox"/>        | <input type="checkbox"/>  | <input type="checkbox"/>  | <input type="checkbox"/>  | <input type="checkbox"/>  | <input type="checkbox"/>  | <input type="checkbox"/>  | <input type="checkbox"/>        |
| <b>G6) Maaltijden</b><br>(ontbijt,...)                                                   | weekdag    | <input type="checkbox"/> | <input type="checkbox"/>       | <input type="checkbox"/>           | <input type="checkbox"/>        | <input type="checkbox"/>  | <input type="checkbox"/>  | <input type="checkbox"/>  | <input type="checkbox"/>  | <input type="checkbox"/>  | <input type="checkbox"/>  | <input type="checkbox"/>        |
|                                                                                          | weekenddag | <input type="checkbox"/> | <input type="checkbox"/>       | <input type="checkbox"/>           | <input type="checkbox"/>        | <input type="checkbox"/>  | <input type="checkbox"/>  | <input type="checkbox"/>  | <input type="checkbox"/>  | <input type="checkbox"/>  | <input type="checkbox"/>  | <input type="checkbox"/>        |

Hoe vaak doet u onderstaande situaties op HETZELFDE moment.

|                                        | Nooit                    | Zelden                   | Soms                     | Vaak                     | Heel vaak                | Niet van<br>toepassing   |
|----------------------------------------|--------------------------|--------------------------|--------------------------|--------------------------|--------------------------|--------------------------|
| G7) tv kijken - GSM gebruiken          | <input type="checkbox"/> | <input type="checkbox"/> | <input type="checkbox"/> | <input type="checkbox"/> | <input type="checkbox"/> | <input type="checkbox"/> |
| G8) tv kijken - computer/tablet        | <input type="checkbox"/> | <input type="checkbox"/> | <input type="checkbox"/> | <input type="checkbox"/> | <input type="checkbox"/> | <input type="checkbox"/> |
| G9) computer - GSM gebruiken           | <input type="checkbox"/> | <input type="checkbox"/> | <input type="checkbox"/> | <input type="checkbox"/> | <input type="checkbox"/> | <input type="checkbox"/> |
| G10) computer - muziek luisteren       | <input type="checkbox"/> | <input type="checkbox"/> | <input type="checkbox"/> | <input type="checkbox"/> | <input type="checkbox"/> | <input type="checkbox"/> |
| G11) GSM - praten met vrienden/familie | <input type="checkbox"/> | <input type="checkbox"/> | <input type="checkbox"/> | <input type="checkbox"/> | <input type="checkbox"/> | <input type="checkbox"/> |
| G12) GSM - muziek luisteren            | <input type="checkbox"/> | <input type="checkbox"/> | <input type="checkbox"/> | <input type="checkbox"/> | <input type="checkbox"/> | <input type="checkbox"/> |

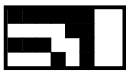

3300

## **H) Gezondheid**

Heeft u gedurende de voorbije maand vaak last gehad van een neerslachtig, depressief of hopeloos gevoel?

Ja

Neen

Heeft u gedurende de laatste maand minder plezier of interesse in wat u doet?

Ja

Neen

## **I) Fysieke activiteit**

Beantwoord onderstaande vragen rekening houdend met volgende activiteiten: activiteiten op het werk, huishouden, werken in tuin, zich verplaatsen van en naar verschillende plaatsen, activiteiten in vrije tijd als ontspanning en sport.

Op hoeveel dagen heeft u tenminste 10 minuten per keer gewandeld als u denkt aan de laatste 7 dagen? Denk hierbij aan wandelen op het werk en thuis, wandelen om van de ene naar de andere plaats te komen, en al het andere wandelen dat u deed tijdens recreatie, sport of vrijetijdsbesteding.

Geen wandelen

\_\_\_ dag(en) per week

Op de dagen dat u ten minste 10 minuten per keer wandelde, hoeveel tijd heeft u daar dan gewoonlijk aan besteed?

\_\_\_ uur/uren \_\_\_ minuten per dag

Op hoeveel dagen heeft u matig fysieke activiteiten verricht, zoals het dragen van lichte lasten, fietsen in een normaal tempo of dubbeltennis als u denkt aan de laatste 7 dagen? Laat wandelen hier buiten beschouwing. Matig intensieve lichamelijke fysieke activiteit laat u iets sneller ademen dan normaal. Denkt u weer alleen aan activiteiten die u ten minste 10 minuten per keer heeft verricht.

Ik heb geen matig intensieve lichamelijke fysieke activiteiten verricht

\_\_\_ dag(en) per week

Op de dagen dat u matig intensief lichamenlijk fysiek actief was, hoeveel tijd heeft u daar dan gewoonlijk aan besteed?

\_\_\_ uur/uren \_\_\_ minuten per dag

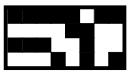

Op hoeveel dagen heeft u zware lichamelijke fysieke activiteiten verricht zoals zware lasten tillen, spitten, sporten, aerobics, voetballen of wielrennen als u denkt aan de laatste 7 dagen? Denk alleen aan de activiteiten die u ten minste 10 minuten per keer heeft verricht. Zware lichamelijke fysieke activiteiten zijn activiteiten die veel lichamelijke inspanning kosten en voor een veel snellere ademhaling zorgen.

Ik heb geen zware lichamelijke fysieke activiteiten verricht

\_\_\_ dag(en) per week

Op de dagen dat u zwaar lichamelijk fysiek actief was, hoeveel tijd heeft u daar dan gewoonlijk aan besteed?

\_\_\_\_ uur/uren \_\_\_\_\_ minuten per dag

### **J) Informatief gedeelte**

J1) Wat is uw moedertaal? (gelieve 1 antwoord te geven)

Nederlands

Frans

Turks

Arabisch

Engels

Andere (noteer) \_\_\_\_\_

J2) Wat is het hoogst behaalde diploma of getuigschrift dat u en eventueel uw partner behaald heeft?

| UZELF                                                                                                                                                                                                                                                                                                                                                   | PARTNER                                                                                                                                                                                                                                                                                                                                                                                                                |
|---------------------------------------------------------------------------------------------------------------------------------------------------------------------------------------------------------------------------------------------------------------------------------------------------------------------------------------------------------|------------------------------------------------------------------------------------------------------------------------------------------------------------------------------------------------------------------------------------------------------------------------------------------------------------------------------------------------------------------------------------------------------------------------|
| <input type="checkbox"/> Lager onderwijs<br><input type="checkbox"/> Beroeps secundair onderwijs (BSO)<br><input type="checkbox"/> Technisch secundair onderwijs (TSO)<br><input type="checkbox"/> Algemeen secundair onderwijs (ASO)<br><input type="checkbox"/> Hoger onderwijs, niet-universitair<br><input type="checkbox"/> Universitair onderwijs | <input type="checkbox"/> Niet van toepassing / weet ik niet<br><input type="checkbox"/> Lager onderwijs<br><input type="checkbox"/> Beroeps secundair onderwijs (BSO)<br><input type="checkbox"/> Technisch secundair onderwijs (TSO)<br><input type="checkbox"/> Algemeen secundair onderwijs (ASO)<br><input type="checkbox"/> Hoger onderwijs, niet-universitair<br><input type="checkbox"/> Universitair onderwijs |

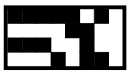

3300

**J3) Momenteel...** (gelieve slechts 1 antwoord te geven)

- werk ik voltijds
- werk ik halftijds of parttime
- doe ik het huishouden
- ben ik werkloos/werkzoekende
- heb ik een loopbaanonderbreking
- ben ik gepensioneerd
- ben ik student

**J4) Indien u werkt, in welke sector werkt u?**

- Niet van toepassing
- Onderwijs
- Bediende
- Kaderpersoneel
- Zelfstandige (geen vrij beroep)
- Vrij beroep
- Arbeider

**J5) Wat is uw lichaamslengte (cm)?** \_\_\_\_\_ cm**J6) Wat is uw lichaamsgewicht (kg)?** \_\_\_\_\_ kg**J7) Hoeveel motorvoertuigen (wagens, moto's, brommers,...) die nog werken, zijn er aanwezig in uw gezin? Gelieve de voertuigen waarvan u geen gebruik maakt OOK mee te rekenen.**

\_\_\_\_\_ (Noteer hier het aantal)

**Bent u bereid om gedurende 1 week twee kleine bewegingsmetertjes te dragen, zodat we uw mate van beweging in kaart kunnen brengen?** Deze bewegingsmeters (gedragen op heup en bovenbeen) hinderen u niet met uw dagelijkse bezigheden. Indien u ons hiervoor de toestemming geeft, nemen we zo snel mogelijk contact met u op. Indien u na het dragen van de bewegingsmetertjes graag uw persoonlijke resultaten krijgt, sturen we u deze graag door!

- Ja
- Neen

**Indien ja**, op welk telefoonnummer kunnen we u bereiken?

|  |  |  |  |  |  |  |  |  |  |  |  |  |  |  |  |  |  |  |  |
|--|--|--|--|--|--|--|--|--|--|--|--|--|--|--|--|--|--|--|--|
|  |  |  |  |  |  |  |  |  |  |  |  |  |  |  |  |  |  |  |  |
|--|--|--|--|--|--|--|--|--|--|--|--|--|--|--|--|--|--|--|--|

**BEDANKT!!!**
