# Supplementary material for: Reliability and validity of three questionnaires measuring context-specific sedentary behaviour and associated correlates in adolescents, adults and older adults
Source: PubMed Central journal article supplement (PMC4574538; doi:10.1186/s12966-015-0277-2), 2015-09-17
Supplement: 12966_2015_277_MOESM4_ESM.pdf [file 12966_2015_277_MOESM4_ESM.pdf]

**Additional file 4** Results of the test-retest reliability study of the adolescents: Intraclass Correlation Coefficients (ICC), kappa and percentage agreement (item-specific)

| Item (per part of the questionnaire)                                                                                     | Test-retest reliability |       |       | Usability |
|--------------------------------------------------------------------------------------------------------------------------|-------------------------|-------|-------|-----------|
|                                                                                                                          | ICC (95% CI)            | kappa | agree |           |
| <b>A) Sedentary-related equipment</b>                                                                                    |                         |       |       |           |
| How many of the following non-portable electronic devices do you use and are present at your home?                       |                         |       |       |           |
| Number of TVs                                                                                                            | 0.95 (0.89; 0.98)       | /     | 85.0  | V         |
| Number of DVD players/video players                                                                                      | 0.38 (-0.06; 0.70)      | /     | 80.0  | V         |
| Number of music players (radio, CD player, stereo,...)                                                                   | 0.87 (0.69; 0.94)       | /     | 70.0  | V         |
| Number of computers (desktop)                                                                                            | 0.96 (0.89; 0.98)       | /     | 83.3  | V         |
| Number of gaming consoles (Xbox, PlayStation,...)                                                                        | 0.95 (0.88; 0.98)       | /     | 78.9  | V         |
| How many of these non-portable electronic devices are present in your bedroom?                                           |                         |       |       |           |
| Number of TVs                                                                                                            | 0.72 (0.41; 0.88)       | /     | 95.0  | V         |
| Number of DVD players/video players                                                                                      | 0.80 (0.56; 0.92)       | /     | 95.0  | V         |
| Number of music players (radio, CD player, stereo,...)                                                                   | 0.83 (0.61; 0.93)       | /     | 85.0  | V         |
| Number of computers (desktop)                                                                                            | 0.66 (0.31; 0.85)       | /     | 95.0  | V         |
| Number of gaming consoles (Xbox, PlayStation,...)                                                                        | 0.53 (0.12; 0.78)       | /     | 95.0  | V         |
| How many of the following portable electronic devices do you use and are present at your home?                           |                         |       |       |           |
| Number of laptops                                                                                                        | 0.93 (0.83; 0.97)       | /     | 90.0  | V         |
| Number of mobile phones (no smartphone)                                                                                  | 0.84 (0.65; 0.94)       | /     | 80.0  | V         |
| Number of smartphones                                                                                                    | 0.84 (0.65; 0.94)       | /     | 70.0  | V         |
| Number of music players (iPod, MP3,...)                                                                                  | 0.78 (0.51; 0.90)       | /     | 70.0  | V         |
| Number of tablets (iPad, Samsung Galaxy Tab,...)                                                                         | 0.87 (0.69; 0.95)       | /     | 89.5  | V         |
| Number of gaming consoles (PlayStation portable, Game Boy,...)                                                           | 0.83 (0.62; 0.93)       | /     | 80.0  | V         |
| <b>B) Potential correlates of TV viewing</b>                                                                             |                         |       |       |           |
| I think watching TV is pleasant                                                                                          | 0.83 (0.62; 0.93)       | /     | 75.0  | V         |
| Watching TV takes time away from doing other important things                                                            | 0.87 (0.70; 0.95)       | /     | 65.0  | V         |
| I enjoy watching TV for many hours at a time                                                                             | 0.85 (0.65; 0.94)       | /     | 52.6  | V         |
| Watching TV is my way to relax                                                                                           | 0.72 (0.41; 0.88)       | /     | 70.0  | V         |
| My family members think I spend too much time watching TV                                                                | 0.64 (0.28; 0.84)       | /     | 55.0  | V         |
| I think that I spend too much time watching TV                                                                           | 0.79 (0.54; 0.91)       | /     | 65.0  | V         |
| I consider it possible to reduce my TV time                                                                              | 0.49 (0.06; 0.77)       | /     | 57.9  | V         |
| I consider it possible to turn off the TV during weekend days until 5:00 p.m.                                            | 0.63 (0.27; 0.83)       | /     | 65.0  | V         |
| I consider it possible to turn off the TV during meals                                                                   | 0.67 (0.31; 0.86)       | /     | 88.9  | V         |
| My family members encourage me to watch less TV                                                                          | 0.63 (0.28; 0.84)       | /     | 65.0  | V         |
| My friends encourage me to watch less TV                                                                                 | 0.57 (0.17; 0.81)       | /     | 84.2  | V         |
| I think that youth my age should not spend more than ... (hours/minutes per day) in front of TV                          | 0.72 (0.41; 0.88)       | /     | 55.0  | V         |
| In which room do you watch TV most often?                                                                                | 0.63 (0.26; 0.83)       | /     | 90.0  | V         |
| How long, on average, do your parents/care givers spend watching TV in leisure time?                                     | 0.53 (0.13; 0.78)       | /     | 70.0  | V         |
| How long, on average, do your siblings spend watching TV in leisure time?                                                | 0.96 (0.90; 0.99)       | /     | 73.7  | V         |
| How often do you watch TV with your parents/care givers in leisure time?                                                 | 0.92 (0.82; 0.97)       | /     | 90.0  | V         |
| How often do you watch TV with your siblings in leisure time?                                                            | 0.92 (0.80; 0.97)       | /     | 80.0  | V         |
| To which extent do you consider it possible to implement standing tasks while watching TV (LPA)?                         | 0.84 (0.63; 0.93)       | /     | 60.0  | V         |
| To which extent do you consider it possible to replace watching TV for 1 hour by standing tasks with light effort (LPA)? | 0.54 (0.14; 0.79)       | /     | 60.0  | V         |
| To which extent do you consider it possible to stand up (short bouts) during advertisements while watching TV?           | 0.59 (0.21; 0.81)       | /     | 55.0  | V         |
| To which extent do you consider it possible to stand up for switching the TV station?                                    | 0.90 (0.75; 0.96)       | /     | 65.0  | V         |
| Do your parents/care givers have rules about how many hours per day you are allowed to watch TV?                         | /                       | 0.44  | 88.9  | V         |
| The remote controller (TV) can always be found closely to me when I need it                                              | 0.85 (0.65; 0.94)       | /     | 75.0  | V         |
| The couches at our place are comfortable to sit for a long time                                                          | 0.83 (0.62; 0.93)       | /     | 70.0  | V         |
| <b>C) Potential correlates of gaming</b>                                                                                 |                         |       |       |           |
| I think playing computer/video games is pleasant                                                                         | 0.74 (0.38; 0.90)       | /     | 66.7  | V         |
| I enjoy playing computer/video games for many hours at a time                                                            | 0.49 (-0.01; 0.80)      | /     | 66.7  | V         |
| Playing computer/video games takes time away from doing other important things                                           | 0.85 (0.62; 0.95)       | /     | 66.7  | V         |
| Playing computer/video games is my way to relax                                                                          | 0.78 (0.45; 0.92)       | /     | 80.0  | V         |
| My parents would be pleased if I spent less time playing computer/video games                                            | 0.80 (0.50; 0.93)       | /     | 53.3  | V         |
| My family members think I spend too much time playing computer/video games                                               | 0.59 (0.13; 0.84)       | /     | 53.3  | V         |
| I think that I spend too much time playing computer/video games                                                          | 0.70 (0.31; 0.89)       | /     | 66.7  | V         |
| I consider it possible to reduce my time playing computer/video games                                                    | 0.24 (-0.32; 0.67)      | /     | 57.1  | X         |
| My family members encourage me to spend less time playing computer/video games                                           | 0.58 (0.11; 0.83)       | /     | 60.0  | V         |
| My friends encourage me to spend less time playing computer/video games                                                  | 0.67 (0.24; 0.88)       | /     | 78.6  | V         |

|                                                                                                                                                  |                    |      |      |   |
|--------------------------------------------------------------------------------------------------------------------------------------------------|--------------------|------|------|---|
| How long, on average, do your parents/care givers sit when playing computer/video games in leisure time?                                         | 0.32 (-0.19; 0.70) | /    | 81.3 | V |
| How long, on average, do your siblings sit when playing computer/video games in leisure time?                                                    | 0.92 (0.78; 0.97)  | /    | 56.3 | V |
| How often do you play computer/video games (seated) with your parents/care givers in leisure time?                                               | 0.32 (-0.19; 0.70) | /    | 81.3 | V |
| How often do you play computer/video games (seated) with your siblings in leisure time?                                                          | 0.88 (0.70; 0.96)  | /    | 75.0 | V |
| How often do you play computer/video games (seated) with your friends in leisure time?                                                           | 0.77 (0.45; 0.91)  | /    | 75.0 | V |
| To which extent do you consider it possible to stand up while playing computer/video games?                                                      | 0.24 (-0.28; 0.65) | /    | 62.5 | V |
| To which extent do you consider it possible to replace playing computer/video games for 1 hour by standing tasks (LPA)?                          | 0.56 (0.10; 0.82)  | /    | 68.8 | V |
| To which extent do you consider it possible to stand up for a couple of minutes after playing computer/video games while sitting for 30 minutes? | 0.45 (-0.04; 0.77) | /    | 50.0 | V |
| Do your parents/care givers have rules about how many hours per day you are allowed to play computer/video games?                                | /                  | 0.63 | 92.9 | V |

#### D) Potential correlates of computer use

|                                                                                                                                                          |                    |      |      |   |
|----------------------------------------------------------------------------------------------------------------------------------------------------------|--------------------|------|------|---|
| How long, on average, do your parents/care givers sit/lying down when using the computer in leisure time?                                                | 0.86 (0.68; 0.94)  | /    | 55.0 | V |
| How long, on average, do your siblings sit when using the computer in leisure time?                                                                      | 0.92 (0.80; 0.97)  | /    | 75.0 | V |
| How often do you use the computer (seated) at the same moment with your parents/care givers using a different computer in the same room in leisure time? | 0.95 (0.87; 0.98)  | /    | 80.0 | V |
| How often do you use the computer (seated) at the same moment with your siblings using a different computer in the same room in leisure time?            | 0.84 (0.64; 0.93)  | /    | 70.0 | V |
| To which extent do you consider it possible to stand up while using a computer?                                                                          | 0.87 (0.69; 0.95)  | /    | 65.0 | V |
| To which extent do you consider it possible to replace using a computer for 1 hour by standing tasks (LPA)?                                              | 0.47 (0.05; 0.75)  | /    | 60.0 | V |
| To which extent do you consider it possible to stand up for a couple of minutes after using a computer while sitting for 30 minutes?                     | 0.71 (0.39; 0.88)  | /    | 57.9 | V |
| Do your parents/care givers have rules about how many hours per day you are allowed to use a computer?                                                   | /                  | 0.49 | 82.4 | V |
| I think using a computer is pleasant in leisure time                                                                                                     | 0.82 (0.59; 0.92)  | /    | 70.0 | V |
| Using a computer takes time away from doing other important things                                                                                       | 0.78 (0.53; 0.91)  | /    | 80.0 | V |
| I enjoy using a computer for many hours at a time                                                                                                        | 0.81 (0.58; 0.92)  | /    | 75.0 | V |
| Using a computer is my way to relax                                                                                                                      | 0.80 (0.57; 0.92)  | /    | 75.0 | V |
| My family members think I spend too much time using a computer                                                                                           | 0.29 (-0.17; 0.65) | /    | 57.9 | X |
| I think that I spend too much time using a computer in leisure time                                                                                      | 0.16 (-0.30; 0.55) | /    | 70.0 | V |
| I consider it possible that I do not use a computer for some days in the week (leisure time)                                                             | 0.50 (0.08; 0.77)  | /    | 45.0 | V |
| I consider it possible to reduce my computer time in leisure time                                                                                        | 0.75 (0.47; 0.89)  | /    | 65.0 | V |
| My family members encourage me to spend less time using a computer in leisure time                                                                       | 0.59 (0.21; 0.81)  | /    | 65.0 | V |
| My friends encourage me to spend less time using a computer in leisure time                                                                              | 0.46 (0.03; 0.74)  | /    | 70.0 | V |

#### E) Potential correlates of motorized transport

|                                                                                                                                      |                    |      |      |   |
|--------------------------------------------------------------------------------------------------------------------------------------|--------------------|------|------|---|
| I think using motorized transport is pleasant                                                                                        | 0.70 (0.37; 0.87)  | /    | 68.4 | V |
| I think it is pleasant to work (e.g. school-related work, call someone,...) or to rest as a passenger during motorized transport     | 0.29 (-0.17; 0.64) | /    | 55.0 | X |
| I feel lazy arriving at my destination after motorized transport                                                                     | 0.86 (0.67; 0.94)  | /    | 68.4 | V |
| I think that I spend too much time using motorized transport                                                                         | 0.73 (0.44; 0.88)  | /    | 70.0 | V |
| I consider it possible to get off the bus/metro spontaneously 1 stop before my destination and to walk the remaining distance        | 0.55 (0.15; 0.79)  | /    | 50.0 | V |
| I consider it possible to take the bicycle or to go by foot spontaneously even if it is possible to use a bus/metro or ride in a car | 0.18 (-0.27; 0.57) | /    | 55.0 | X |
| My family members encourage me to use (more often) active transport (to bicycle or to walk)                                          | 0.61 (0.23; 0.83)  | /    | 63.2 | V |
| My friends encourage me to use (more often) active transport (to bicycle or to walk)                                                 | 0.57 (0.18; 0.81)  | /    | 75.0 | V |
| My family members think I spend too much time using motorized transport                                                              | 0.56 (0.17; 0.80)  | /    | 70.0 | V |
| The most chosen transportation possibility to go to work/school from my parents/care givers is ...                                   | /                  | 0.30 | 89.5 | V |
| The most chosen transportation possibility to go to work/school from my siblings is ...                                              | /                  | 0.83 | 90.0 | V |
| The most chosen transportation possibility in leisure time from my parents/care givers is ...                                        | /                  | 0.63 | 85.0 | V |
| The most chosen transportation possibility in leisure time from my siblings is ...                                                   | /                  | 0.84 | 90.0 | V |
| To which extent do you consider it possible to stand up spontaneously in a bus, train or metro (instead of sitting)?                 | 0.75 (0.46; 0.89)  | /    | 75.0 | V |
| To which extent do you consider it possible to stand up (for a short duration) after                                                 | 0.80 (0.57; 0.92)  | /    | 75.0 | V |

|                                                                                                                                                                                                                                                                                     |                     |   |      |   |
|-------------------------------------------------------------------------------------------------------------------------------------------------------------------------------------------------------------------------------------------------------------------------------------|---------------------|---|------|---|
| sitting for 30 minutes in bus, train or metro?                                                                                                                                                                                                                                      |                     |   |      |   |
| How often do you use motorized transport to and from work/school together with your parents/care givers?                                                                                                                                                                            | 0.93 (0.82; 0.97)   | / | 80.0 | V |
| How often do you use motorized transport to and from work/school together with your siblings?                                                                                                                                                                                       | 0.99 (0.96; 1.00)   | / | 89.5 | V |
| How often do you use motorized transport together with your parents/care givers in leisure time on a weekday?                                                                                                                                                                       | 0.71 (0.39; 0.87)   | / | 65.0 | V |
| How often do you use motorized transport together with your parents/care givers in leisure time on a weekend day?                                                                                                                                                                   | 0.72 (0.42; 0.88)   | / | 70.0 | V |
| How often do you use motorized transport together with your siblings in leisure time on a weekday?                                                                                                                                                                                  | 0.91 (0.80; 0.97)   | / | 80.0 | V |
| How often do you use motorized transport together with your siblings in leisure time on a weekend day?                                                                                                                                                                              | 0.89 (0.73; 0.96)   | / | 66.7 | V |
| <b>F) Potential correlates of school</b>                                                                                                                                                                                                                                            |                     |   |      |   |
| How many hours physical education or sport do you have during the week at school (= during classes; include 'swimming classes'; do not include 'after school activities')                                                                                                           | 0.92 (0.81; 0.97)   | / | 85.0 | V |
| What is your most common behaviour during school breaks at school?                                                                                                                                                                                                                  | 0.57 (0.18; 0.80)   | / | 75.0 | V |
| What is your most common behaviour during lunch break at school?                                                                                                                                                                                                                    | 0.79 (0.55; 0.91)   | / | 75.0 | V |
| <b>G) Sedentary behaviours</b>                                                                                                                                                                                                                                                      |                     |   |      |   |
| In the last 7 days, on average, how long did you spend sitting or lying down watching TV in leisure time per weekday? (do include meals while sitting and watching TV)                                                                                                              | 0.79 (0.54; 0.91)   | / | 45.0 | V |
| In the last 7 days, on average, how long did you spend sitting or lying down watching TV in leisure time per weekend day? (do include meals while sitting and watching TV)                                                                                                          | 0.65 (0.31; 0.85)   | / | 55.0 | V |
| In the last 7 days, on average, how long did you spend sitting or lying down during playing computer/video games in leisure time per weekday?                                                                                                                                       | 0.10 (-0.40; 0.56)  | / | 18.8 | X |
| In the last 7 days, on average, how long did you spend sitting or lying down during playing computer/video games in leisure time per weekend day?                                                                                                                                   | 0.36 (-0.17; 0.73)  | / | 53.3 | X |
| In the last 7 days, on average, how long did you spend sitting or lying down during computer use in leisure time per weekday?                                                                                                                                                       | 0.50 (0.09; 0.77)   | / | 40.0 | V |
| In the last 7 days, on average, how long did you spend sitting or lying down during computer use in leisure time per weekend day?                                                                                                                                                   | 0.50 (0.07; 0.77)   | / | 42.1 | V |
| In the last 7 days, on average, how long did you sit a day while using motorized transport to and from your school (in a car, bus, train, on a motorbike, etc.; do not include cycling on a pedal bicycle)?                                                                         | 0.86 (0.66; 0.95)   | / | 52.9 | V |
| In the last 7 days, on average, how long did you sit using motorized transport in leisure time (e.g. to shops, friends,...), apart from your transport to and from school, per weekday (in a car, bus, train, on a motorbike, etc.; do not include cycling on a pedal bicycle)?     | 0.33 (-0.14; 0.67)  | / | 57.9 | X |
| In the last 7 days, on average, how long did you sit using motorized transport in leisure time (e.g. to shops, friends,...), apart from your transport to and from school, per weekend day (in a car, bus, train, on a motorbike, etc.; do not include cycling on a pedal bicycle)? | -0.06 (-0.49; 0.40) | / | 26.3 | X |
| In the last 7 days, on average, how long did you spend sitting during classes at school per day (do not include study time at home)?                                                                                                                                                | -0.01 (-0.44; 0.43) | / | 35.0 | X |
| In the last 7 days, on average, how long did you spend sitting or lying down during the following activities per day?                                                                                                                                                               |                     |   |      |   |
| Sitting while reading (book, magazine,...) on a weekday – only printed documents                                                                                                                                                                                                    | 0.76 (0.48; 0.90)   | / | 65.0 | V |
| Sitting while reading (book, magazine,...) on a weekend day – only printed documents                                                                                                                                                                                                | 0.92 (0.80; 0.97)   | / | 73.7 | V |
| Sitting for hobbies (voluntary work, drawing classes,...) on a weekday                                                                                                                                                                                                              | 0.19 (-0.27; 0.57)  | / | 70.0 | V |
| Sitting for hobbies (voluntary work, drawing classes,...) on a weekend day                                                                                                                                                                                                          | 0.18 (-0.27; 0.57)  | / | 70.0 | V |
| Sitting for socializing (visiting friends, cinema,...) on a weekday                                                                                                                                                                                                                 | 0.55 (0.15; 0.79)   | / | 25.0 | V |
| Sitting for socializing (visiting friends, cinema,...) on a weekend day                                                                                                                                                                                                             | 0.43 (0.001; 0.73)  | / | 55.0 | V |
| Sitting while listening to music (radio, MP3,...) on a weekday                                                                                                                                                                                                                      | 0.48 (0.02; 0.77)   | / | 44.4 | V |
| Sitting while listening to music (radio, MP3,...) on a weekend day                                                                                                                                                                                                                  | 0.38 (-0.09; 0.71)  | / | 33.3 | X |
| Sitting during meals (breakfast – dinner) on a weekday – do NOT include meals while sitting and watching TV                                                                                                                                                                         | 0.13 (-0.32; 0.53)  | / | 55.0 | X |
| Sitting during meals (breakfast – dinner) on a weekend day – do NOT include meals while sitting and watching TV                                                                                                                                                                     | 0.03 (-0.41; 0.46)  | / | 55.0 | X |
| Sitting during school work (at home: making homework, studying, using the computer for school,...) on a weekday                                                                                                                                                                     | 0.52 (0.11; 0.78)   | / | 60.0 | V |
| Sitting during school work (at home: making homework, studying, using the computer for school,...) on a weekend day                                                                                                                                                                 | 0.45 (0.02; 0.74)   | / | 30.0 | V |
| Sitting for using mobile phone (calling and texting) on a weekday                                                                                                                                                                                                                   | 0.40 (-0.04; 0.71)  | / | 50.0 | X |
| Sitting for using mobile phone (calling and texting) on a weekend day                                                                                                                                                                                                               | 0.49 (0.08; 0.76)   | / | 50.0 | V |
| <b>H) Simultaneous behaviour</b>                                                                                                                                                                                                                                                    |                     |   |      |   |
| How often do you do the following situations at the same time (simultaneously)?                                                                                                                                                                                                     |                     |   |      |   |
| Watching TV AND using mobile phone                                                                                                                                                                                                                                                  | 0.87 (0.71; 0.95)   | / | 70.0 | V |
| Watching TV AND using computer/tablet                                                                                                                                                                                                                                               | 0.85 (0.67; 0.94)   | / | 65.0 | V |

|                                                                          |                   |   |      |   |
|--------------------------------------------------------------------------|-------------------|---|------|---|
| Using computer AND using mobile phone                                    | 0.71 (0.39; 0.88) | / | 63.2 | V |
| Using computer AND listening to music                                    | 0.71 (0.38; 0.88) | / | 68.4 | V |
| Using mobile phone (texting) AND having conversation with friends/family | 0.88 (0.72; 0.95) | / | 70.0 | V |
| Using mobile phone AND listening to music                                | 0.83 (0.61; 0.93) | / | 75.0 | V |

---

*Note: Agree (% agreement), LPA (light physical activities), CI (confidence interval).*

*Interpretation 'usability': V (item has moderate-to-excellent reliability, so can be used as a reliable item ); X (item showed to have poor reliability, so cannot be used as a reliable single item)*
