# Supplementary material for: Reliability and validity of three questionnaires measuring context-specific sedentary behaviour and associated correlates in adolescents, adults and older adults
Source: PubMed Central journal article supplement (PMC4574538; doi:10.1186/s12966-015-0277-2), 2015-09-17
Supplement: 12966_2015_277_MOESM5_ESM.pdf [file 12966_2015_277_MOESM5_ESM.pdf]

**Additional file 5** Results of the test-retest reliability study of the adults: Intraclass Correlation Coefficients (ICC), kappa and percentage agreement (item-specific)

| Item (per part of the questionnaire)                                                                                                                                 | Test-retest reliability |       |       | Usability |
|----------------------------------------------------------------------------------------------------------------------------------------------------------------------|-------------------------|-------|-------|-----------|
|                                                                                                                                                                      | ICC (95% CI)            | kappa | agree |           |
| <b>A) Potential correlates of TV viewing</b>                                                                                                                         |                         |       |       |           |
| I think watching TV is pleasant                                                                                                                                      | 0.75 (0.49; 0.89)       | /     | 59.1  | V         |
| Watching TV takes time away from doing other important things                                                                                                        | 0.67 (0.35; 0.85)       | /     | 50.0  | V         |
| I enjoy watching TV for many hours at a time                                                                                                                         | 0.73 (0.46; 0.88)       | /     | 72.7  | V         |
| Watching TV is my way to relax after a school day/workday                                                                                                            | 0.67 (0.36; 0.85)       | /     | 45.5  | V         |
| My family members think I spend too much time watching TV                                                                                                            | 0.87 (0.71; 0.95)       | /     | 81.0  | V         |
| I think that I spend too much time watching TV                                                                                                                       | 0.82 (0.62; 0.92)       | /     | 81.8  | V         |
| I consider it possible to reduce my TV time                                                                                                                          | 0.31 (-0.14; 0.66)      | /     | 35.0  | X         |
| I consider it possible to turn off the TV during weekend days until 5:00 p.m.                                                                                        | 0.57 (0.21; 0.80)       | /     | 81.8  | V         |
| I consider it possible to turn off the TV during meals                                                                                                               | 0.74 (0.47; 0.88)       | /     | 81.8  | V         |
| My family members encourage me to watch less TV                                                                                                                      | 0.38 (-0.05; 0.69)      | /     | 76.2  | V         |
| My friends encourage me to watch less TV                                                                                                                             | 0.59 (0.23; 0.81)       | /     | 52.4  | V         |
| I think that adults should not spend more than ... (hours/minutes per day) in front of TV                                                                            | 0.76 (0.49; 0.89)       | /     | 57.1  | V         |
| In which room do you watch TV most often?                                                                                                                            | 0.35 (-0.07; 0.67)      | /     | 95.5  | V         |
| How long, on average, does your partner spend watching TV?                                                                                                           | 0.84 (0.65; 0.93)       | /     | 47.6  | V         |
| How long, on average, do your children (still living at home) spend watching TV?                                                                                     | 0.88 (0.69; 0.96)       | /     | 50.0  | V         |
| How often do you watch TV with your partner?                                                                                                                         | 0.88 (0.73; 0.95)       | /     | 71.4  | V         |
| How often do you watch TV with your children (still living at home)?                                                                                                 | 0.93 (0.80; 0.98)       | /     | 66.7  | V         |
| To which extent do you consider it possible to implement standing tasks while watching TV (e.g. ironing, doing chores)?                                              | 0.55 (0.17; 0.79)       | /     | 42.9  | V         |
| To which extent do you consider it possible to replace watching TV for 1 hour by standing tasks with light effort (e.g. cleaning, doing chores)?                     | 0.57 (0.20; 0.80)       | /     | 28.6  | V         |
| To which extent do you consider it possible to stand up (short bouts) during advertisements while watching TV?                                                       | 0.43 (0.003; 0.72)      | /     | 47.6  | V         |
| <b>B) Potential correlates of computer use</b>                                                                                                                       |                         |       |       |           |
| How long, on average, does your partner sit when using the computer (tablet, internet on smartphone, laptop, desktop,...) in leisure time?                           | 0.20 (-0.26; 0.58)      | /     | 25.0  | X         |
| How long, on average, do your children (still living at home) sit when using the computer (tablet, internet on smartphone, laptop, desktop,...) in leisure time?     | 0.83 (0.60; 0.93)       | /     | 52.6  | V         |
| How often do you use the computer (seated) at the same moment with your partner using a different computer in the same room in leisure time?                         | 0.67 (0.33; 0.85)       | /     | 40.0  | V         |
| How often do you use the computer (seated) at the same moment with your children (still living at home) using a different computer in the same room in leisure time? | 0.92 (0.79; 0.97)       | /     | 73.3  | V         |
| To which extent do you consider it possible to stand up while using a computer?                                                                                      | 0.34 (-0.09; 0.67)      | /     | 52.4  | X         |
| To which extent do you consider it possible to replace using a computer for 1 hour by standing tasks with light effort (e.g. cleaning, doing chores)?                | 0.43 (0.01; 0.72)       | /     | 33.3  | V         |
| To which extent do you consider it possible to stand up for a couple of minutes after using a computer while sitting for 30 minutes?                                 | 0.18 (-0.26; 0.56)      | /     | 52.4  | X         |
| I think using a computer is pleasant in leisure time                                                                                                                 | 0.75 (0.49; 0.89)       | /     | 47.6  | V         |
| Using a computer takes time away from doing other important things                                                                                                   | 0.59 (0.21; 0.81)       | /     | 55.0  | V         |
| I enjoy using a computer for many hours at a time                                                                                                                    | 0.79 (0.56; 0.91)       | /     | 76.2  | V         |
| Using a computer is my way to relax after a school day/workday                                                                                                       | 0.66 (0.33; 0.85)       | /     | 52.4  | V         |
| My family members think I spend too much time using a computer                                                                                                       | 0.35 (-0.09; 0.67)      | /     | 57.1  | X         |
| I think that I spend too much time using a computer                                                                                                                  | 0.55 (0.15; 0.79)       | /     | 60.0  | V         |
| I consider it possible that I do not use a computer for some days in the week (leisure time)                                                                         | 0.55 (0.17; 0.79)       | /     | 52.4  | V         |
| I consider it possible to reduce my computer time in leisure time                                                                                                    | 0.70 (0.39; 0.86)       | /     | 61.9  | V         |
| My family members encourage me to spend less time using a computer in leisure time                                                                                   | 0.38 (-0.06; 0.70)      | /     | 60.0  | X         |
| My friends encourage me to spend less time using a computer in leisure time                                                                                          | 0.52 (0.12; 0.77)       | /     | 52.4  | V         |
| <b>C) Potential correlates of motorized transport</b>                                                                                                                |                         |       |       |           |
| I feel lazy arriving at my destination after motorized transport                                                                                                     | 0.43 (0.004; 0.72)      | /     | 52.4  | V         |
| I think using motorized transport is pleasant                                                                                                                        | 0.72 (0.43; 0.88)       | /     | 60.0  | V         |
| I think it is pleasant to work or to rest as a passenger during motorized transport                                                                                  | 0.58 (0.20; 0.81)       | /     | 45.0  | V         |
| I think that I spend too much time using motorized transport                                                                                                         | 0.66 (0.33; 0.85)       | /     | 61.9  | V         |
| I consider it possible to get off the bus/metro spontaneously 1 stop before my destination and to walk the remaining distance                                        | 0.67 (0.30; 0.86)       | /     | 55.6  | V         |
| I consider it possible to park the car somewhat further spontaneously and to walk the remaining distance                                                             | 0.66 (0.32; 0.84)       | /     | 38.1  | V         |
| I consider it possible to take the bicycle or to go by foot spontaneously even if it is possible to use a car                                                        | 0.75 (0.47; 0.89)       | /     | 61.9  | V         |
| My family members encourage me to use (more often) active transport (to bicycle or to walk)                                                                          | 0.45 (0.03; 73)         | /     | 38.1  | V         |

|                                                                                                                                                    |                     |      |      |   |
|----------------------------------------------------------------------------------------------------------------------------------------------------|---------------------|------|------|---|
| My friends encourage me to use (more often) active transport (to bicycle or to walk)                                                               | 0.55 (0.16; 0.79)   | /    | 42.9 | V |
| My family members think I spend too much time using motorized transport                                                                            | 0.50 (0.10; 0.76)   | /    | 61.9 | V |
| The most chosen transportation possibility to go to work/school from my partner is ...                                                             | /                   | 1.00 | 100  | V |
| The most chosen transportation possibility to go to work/school from my children (still living at home) is ...                                     | /                   | 0.59 | 73.7 | V |
| The most chosen transportation possibility in leisure time from my partner is ...                                                                  | /                   | 0.29 | 75.0 | V |
| The most chosen transportation possibility in leisure time from my children (still living at home) is ...                                          | /                   | 0.75 | 84.2 | V |
| To which extent do you consider it possible to stand up spontaneously in a bus, train or metro (instead of sitting)?                               | 0.78 (0.52; 0.91)   | /    | 50.0 | V |
| To which extent do you consider it possible to stand up (for a short duration) after sitting for 30 minutes in bus, train or metro?                | 0.72 (0.41; 0.88)   | /    | 55.0 | V |
| It is easy to park the car at public places (shops, station,...)                                                                                   | 0.70 (0.40; 0.87)   | /    | 66.7 | V |
| I receive a lot of information about 'sitting activities' like cinema or sport games via billboards along the road and/or the radio                | 0.63 (0.27; 0.83)   | /    | 55.0 | V |
| How often do you use motorized transport to and from work/school together with your partner?                                                       | 0.87 (0.70; 0.94)   | /    | 81.0 | V |
| How often do you use motorized transport to and from work/school together with your children (still living at home)?                               | 0.81 (0.58; 0.92)   | /    | 76.2 | V |
| How often do you use motorized transport in leisure time together with your partner on a weekday?                                                  | 0.77 (0.51; 0.90)   | /    | 57.1 | V |
| How often do you use motorized transport in leisure time together with your partner on a weekend day?                                              | 0.42 (-0.004; 0.72) | /    | 71.4 | V |
| How often do you use motorized transport in leisure time together with your children (still living at home) on a weekday?                          | 0.94 (0.86; 0.98)   | /    | 80.0 | V |
| How often do you use motorized transport in leisure time together with your children (still living at home) on a weekend day?                      | 1.00 (1.00; 1.00)   | /    | 100  | V |
| <b>D) Potential correlates of occupation</b>                                                                                                       |                     |      |      |   |
| My attention decreases while sitting for a long time                                                                                               | 0.63 (0.27; 0.83)   | /    | 35.0 | V |
| I think it is pleasant to sit for a long time during working hours                                                                                 | 0.52 (0.11; 0.78)   | /    | 50.0 | V |
| Sitting at work is an ideal opportunity to rest                                                                                                    | 0.73 (0.43; 0.88)   | /    | 75.0 | V |
| My colleagues think I spend too much time sitting                                                                                                  | 0.60 (0.19; 0.83)   | /    | 44.4 | V |
| I think that I spend too much time sitting at work                                                                                                 | 0.72 (0.41; 0.88)   | /    | 57.9 | V |
| I consider it possible to do certain tasks (calling,...) while standing                                                                            | 0.66 (0.31; 0.85)   | /    | 60.0 | V |
| I consider it possible to stand up for a while after a period of uninterrupted sitting                                                             | 0.54 (0.14; 0.79)   | /    | 55.0 | V |
| I consider it possible to stand up more often during breaks                                                                                        | 0.48 (0.07; 0.76)   | /    | 55.0 | V |
| My colleagues encourage me to sit less                                                                                                             | 0.31 (-0.15; 0.65)  | /    | 55.0 | X |
| My colleagues at my office and/or department stand up regularly during working hours and/or breaks                                                 | 0.50 (0.08; 0.76)   | /    | 45.0 | V |
| What action do you do most often when you have a question for a colleague at another office?                                                       | 0.87 (0.70; 0.95)   | /    | 94.7 | V |
| How many persons are there in your office (including yourself)?                                                                                    | 0.94 (0.81; 0.98)   | /    | 76.9 | V |
| At work I have bicycles provided by the employer                                                                                                   | /                   | 0.69 | 90.0 | V |
| At work I have employer subsidized public transport                                                                                                | /                   | 0.77 | 90.0 | V |
| The office chairs are comfortable to sit                                                                                                           | /                   | 0.35 | 70.6 | V |
| There is a spacious and/or easy parking                                                                                                            | /                   | 0.44 | 89.5 | V |
| There is a bicycle parking                                                                                                                         | /                   | 0.73 | 89.5 | V |
| There are standing desks (heightened desks at which one can work while standing)                                                                   | /                   | 1.00 | 100  | V |
| To which extent do you consider it possible to stand up while working at your desk?                                                                | 0.74 (0.40; 0.90)   | /    | 68.8 | V |
| To which extent do you consider it possible to stand up while calling?                                                                             | 0.55 (0.13; 0.81)   | /    | 44.4 | V |
| To which extent do you consider it possible to go to a colleague yourself instead of calling him/her?                                              | 0.40 (-0.09; 0.73)  | /    | 58.8 | X |
| To which extent do you consider it possible to stand up for a couple of minutes after sitting for 30 minutes?                                      | 0.63 (0.24; 0.84)   | /    | 72.2 | V |
| To which extent do you consider it possible to remove appliances so that you would have to stand up to operate them (e.g. printer, telephone,...)? | 0.49 (-0.01; 0.80)  | /    | 53.3 | V |
| I think interrupting sitting activities by standing up at work is disturbing for colleagues                                                        | 0.78 (0.50; 0.92)   | /    | 52.9 | V |
| I think interrupting sitting activities by standing up at work is ridiculous                                                                       | 0.06 (-0.44; 0.52)  | /    | 25.0 | X |
| I think interrupting sitting activities by standing up at work is good for my health                                                               | 0.76 (0.42; 0.91)   | /    | 73.3 | V |
| I am sure that I can stand up (more often) as a break during my work, even if my colleagues are not doing this                                     | 0.39 (-0.10; 0.72)  | /    | 35.3 | X |
| I am sure that I can stand up (more often) as a break during my work, even if my colleagues do not support me                                      | 0.51 (0.04; 0.80)   | /    | 62.5 | V |
| How would you like to perform the following tasks at work?                                                                                         |                     |      |      |   |
| Making phone calls                                                                                                                                 | /                   | 0.74 | 88.2 | V |
| Having short meetings                                                                                                                              | /                   | 0.78 | 88.9 | V |

|                                                                                                                                                                            |                    |       |      |   |
|----------------------------------------------------------------------------------------------------------------------------------------------------------------------------|--------------------|-------|------|---|
| Doing desk work                                                                                                                                                            | /                  | Δ     | 94.7 | V |
| Taking coffee breaks                                                                                                                                                       | /                  | 0.89  | 95.0 | V |
| Taking lunch breaks                                                                                                                                                        | /                  | -0.07 | 85.0 | V |
| <b>E) Potential correlates of household tasks and making phone calls</b>                                                                                                   |                    |       |      |   |
| I think it is pleasant to sit while doing household tasks                                                                                                                  | 0.66 (0.34; 0.84)  | /     | 45.5 | V |
| I work faster when I sit during household tasks                                                                                                                            | 0.63 (0.29; 0.83)  | /     | 45.5 | V |
| I would like to stand more often while doing household tasks                                                                                                               | 0.38 (-0.04; 0.68) | /     | 54.5 | X |
| I think that I can stand up more often while doing household tasks                                                                                                         | 0.54 (0.15; 0.79)  | /     | 50.0 | V |
| I consider it possible to stand up while calling                                                                                                                           | 0.74 (0.46; 0.88)  | /     | 68.2 | V |
| I consider it possible to stand up while doing tasks in the kitchen                                                                                                        | 0.76 (0.51; 0.89)  | /     | 81.8 | V |
| My family members encourage me to sit less while doing household tasks                                                                                                     | 0.27 (-0.17; 0.61) | /     | 45.5 | X |
| Household tasks are usually done while sitting by my children                                                                                                              | 0.85 (0.68; 0.94)  | /     | 72.7 | V |
| Household tasks are usually done while sitting by my partner                                                                                                               | 0.26 (-0.17; 0.61) | /     | 40.9 | X |
| How would you like to perform the following household tasks?                                                                                                               |                    |       |      |   |
| Making phone calls                                                                                                                                                         | /                  | 0.70  | 86.4 | V |
| Peeling potatoes/cutting vegetables                                                                                                                                        | /                  | 0.61  | 90.9 | V |
| Ironing                                                                                                                                                                    | /                  | Δ     | 95.5 | V |
| Folding laundry                                                                                                                                                            | /                  | 0.49  | 86.4 | V |
| Brushing teeth                                                                                                                                                             | /                  | Δ     | 100  | V |
| To repair something                                                                                                                                                        | /                  | 0.31  | 76.2 | V |
| To which extent do you consider it possible to do more household tasks while being upright?                                                                                | 0.55 (0.18; 0.79)  | /     | 45.5 | V |
| To which extent do you consider it possible to remove appliances so that you would have to stand up to operate them (e.g. printer, remote controller TV,...)?              | 0.62 (0.27; 0.82)  | /     | 50.0 | V |
| I am sure that I can interrupt my sitting activities (more often) at home, even if my family members are not doing this                                                    | 0.61 (0.26; 0.81)  | /     | 63.6 | V |
| I am sure that I can interrupt my sitting activities (more often) at home, even if my family members do not support/understand me                                          | 0.56 (0.17; 0.80)  | /     | 50.0 | V |
| <b>F) Sedentary-related equipment</b>                                                                                                                                      |                    |       |      |   |
| How many of the following non-portable electronic devices do you use and are present at your home?                                                                         |                    |       |      |   |
| Number of TVs (pay TV)                                                                                                                                                     | 0.86 (0.69; 0.94)  | /     | 90.9 | V |
| Number of TVs (no pay TV)                                                                                                                                                  | 0.77 (0.52; 0.90)  | /     | 81.8 | V |
| Number of DVD players/video players                                                                                                                                        | 0.86 (0.69; 0.94)  | /     | 86.4 | V |
| Number of music players (radio, CD player, stereo,...)                                                                                                                     | 0.74 (0.46; 0.89)  | /     | 47.6 | V |
| Number of computers (desktop)                                                                                                                                              | 0.76 (0.50; 0.89)  | /     | 81.8 | V |
| Number of gaming consoles for TV (Xbox, PlayStation,...)                                                                                                                   | 0.67 (0.35; 0.85)  | /     | 85.7 | V |
| Number of telephones (dedicated line)                                                                                                                                      | 0.91 (0.80; 0.96)  | /     | 86.4 | V |
| How many of these non-portable electronic devices are present in your bedroom?                                                                                             |                    |       |      |   |
| Number of TVs (pay TV)                                                                                                                                                     | 1.00 (1.00; 1.00)  | /     | 100  | V |
| Number of TVs (no pay TV)                                                                                                                                                  | 1.00 (1.00; 1.00)  | /     | 100  | V |
| Number of DVD players/video players                                                                                                                                        | 1.00 (1.00; 1.00)  | /     | 100  | V |
| Number of music players (radio, CD player, stereo,...)                                                                                                                     | 0.70 (0.40; 0.86)  | /     | 86.4 | V |
| Number of computers (desktop)                                                                                                                                              | ^                  | /     | 95.2 | V |
| Number of gaming consoles for TV (Xbox, PlayStation,...)                                                                                                                   | ^                  | /     | 100  | V |
| Number of telephones (dedicated line)                                                                                                                                      | 0.84 (0.65; 0.93)  | /     | 95.5 | V |
| How many of the following portable electronic devices do you use and are present at your home?                                                                             |                    |       |      |   |
| Number of laptops                                                                                                                                                          | 0.29 (-0.14; 0.63) | /     | 68.2 | V |
| Number of mobile phones (no smartphone)                                                                                                                                    | 0.49 (0.10; 0.75)  | /     | 77.3 | V |
| Number of smartphones                                                                                                                                                      | 0.87 (0.72; 0.95)  | /     | 86.4 | V |
| Number of music players (iPod, MP3,...)                                                                                                                                    | 0.51 (0.12; 0.76)  | /     | 90.9 | V |
| Number of gaming consoles (PlayStation portable, Game Boy,...)                                                                                                             | 0.31 (-0.13; 0.65) | /     | 95.2 | V |
| Number of tablets (iPad, Samsung Galaxy Tab,...)                                                                                                                           | 0.89 (0.76; 0.96)  | /     | 95.2 | V |
| The remote controller (TV) can always be found closely to me when I need it                                                                                                | 0.50 (0.11; 0.76)  | /     | 63.6 | V |
| The couches at our place are comfortable to sit for a long time                                                                                                            | 0.56 (0.19; 0.79)  | /     | 68.2 | V |
| <b>G) Sedentary behaviours</b>                                                                                                                                             |                    |       |      |   |
| In the last 7 days, on average, how long did you spend sitting or lying down watching TV in leisure time per weekday? (do include meals while sitting and watching TV)     | 0.77 (0.50; 0.90)  | /     | 45.0 | V |
| In the last 7 days, on average, how long did you spend sitting or lying down watching TV in leisure time per weekend day? (do include meals while sitting and watching TV) | 0.73 (0.44; 0.88)  | /     | 25.0 | V |
| In the last 7 days, on average, how long did you spend sitting during computer use in leisure time per weekday?                                                            | 0.89 (0.75; 0.95)  | /     | 71.4 | V |
| In the last 7 days, on average, how long did you spend sitting during computer use in leisure time per weekend day?                                                        | 0.90 (0.76; 0.96)  | /     | 60.0 | V |

|                                                                                                                                                                                                                                                                                               |                    |   |      |   |
|-----------------------------------------------------------------------------------------------------------------------------------------------------------------------------------------------------------------------------------------------------------------------------------------------|--------------------|---|------|---|
| In the last 7 days, on average, how long did you sit a day while travelling to and from your occupation/school (moped, in a car, bus, train, metro or on a motorbike; do not include cycling on a pedal bicycle)?                                                                             | 0.95 (0.88; 0.98)  | / | 68.4 | V |
| In the last 7 days, on average, how long did you sit a day while travelling as part of your occupation (during working hours) (moped, in a car, bus, train, metro or on a motorbike; do not include cycling on a pedal bicycle)?                                                              | 0.86 (0.66; 0.94)  | / | 52.6 | V |
| In the last 7 days, on average, how long did you sit while travelling in leisure time (e.g. to shops, friends,...), apart from your transport to and from occupation/school, per weekday (in a car, bus, train, metro, on a motorbike, moped; do not include cycling on a pedal bicycle)?     | 0.73 (0.45; 0.88)  | / | 38.1 | V |
| In the last 7 days, on average, how long did you sit while travelling in leisure time (e.g. to shops, friends,...), apart from your transport to and from occupation/school, per weekend day (in a car, bus, train, metro, on a motorbike, moped; do not include cycling on a pedal bicycle)? | 0.22 (-0.24; 0.61) | / | 31.6 | X |
| In the last 7 days, on average, how much time per day did you spend sitting while doing your occupation?                                                                                                                                                                                      | 0.88 (0.73; 0.95)  | / | 50.0 | V |
| In the last 7 days, on average, how much time per day did you spend sitting while doing household tasks (e.g. cooking, ironing, to repair something) and making phone calls at home per weekday?                                                                                              | 0.49 (0.09; 0.75)  | / | 45.5 | V |
| In the last 7 days, on average, how much time per day did you spend sitting while doing household tasks (e.g. cooking, ironing, to repair something) and making phone calls at home per weekend day?                                                                                          | 0.45 (0.05; 0.73)  | / | 40.9 | V |
| In the last 7 days, on average, how long did you spend sitting or lying down during the following activities per day?                                                                                                                                                                         |                    |   |      |   |
| Sitting while reading (book, magazine, newspaper,...) on a weekday                                                                                                                                                                                                                            | 0.53 (0.14; 0.78)  | / | 42.9 | V |
| Sitting while reading (book, magazine, newspaper,...) on a weekend day                                                                                                                                                                                                                        | 0.63 (0.28; 0.83)  | / | 38.1 | V |
| Sitting while caring (children, family members,...) on a weekday                                                                                                                                                                                                                              | 0.51 (0.11; 0.77)  | / | 66.7 | V |
| Sitting while caring (children, family members,...) on a weekend day                                                                                                                                                                                                                          | 0.68 (0.34; 0.86)  | / | 68.4 | V |
| Sitting for hobbies (drawing, playing cards,...) on a weekday                                                                                                                                                                                                                                 | 0.67 (0.35; 0.85)  | / | 38.1 | V |
| Sitting for hobbies (drawing, playing cards,...) on a weekend day                                                                                                                                                                                                                             | 0.49 (0.07; 0.76)  | / | 40.0 | V |
| Sitting for socializing (visiting friends, in a pub, cinema,...) on a weekday                                                                                                                                                                                                                 | 0.44 (0.02; 0.73)  | / | 47.6 | V |
| Sitting for socializing (visiting friends, in a pub, cinema,...) on a weekend day                                                                                                                                                                                                             | 0.81 (0.59; 0.92)  | / | 42.9 | V |
| Sitting while listening to music (radio, CD, iPod,...) on a weekday                                                                                                                                                                                                                           | 0.74 (0.47; 0.88)  | / | 45.5 | V |
| Sitting while listening to music (radio, CD, iPod,...) on a weekend day                                                                                                                                                                                                                       | 0.69 (0.38; 0.86)  | / | 57.1 | V |
| Sitting during meals (breakfast,...) on a weekday                                                                                                                                                                                                                                             | 0.66 (0.33; 0.84)  | / | 68.2 | V |
| Sitting during meals (breakfast,...) on a weekend day                                                                                                                                                                                                                                         | 0.63 (0.28; 0.83)  | / | 52.4 | V |
| <b>H) Simultaneous behaviour</b>                                                                                                                                                                                                                                                              |                    |   |      |   |
| How often do you do the following situations at the same time?                                                                                                                                                                                                                                |                    |   |      |   |
| Watching TV AND using mobile phone                                                                                                                                                                                                                                                            | 0.87 (0.70; 0.94)  | / | 66.7 | V |
| Watching TV AND using computer/tablet                                                                                                                                                                                                                                                         | 0.87 (0.71; 0.95)  | / | 71.4 | V |
| Using computer AND using mobile phone                                                                                                                                                                                                                                                         | 0.86 (0.70; 0.94)  | / | 68.2 | V |
| Using computer AND listening to music                                                                                                                                                                                                                                                         | 0.69 (0.39; 0.86)  | / | 54.5 | V |
| Using mobile phone AND having conversation with friends/family                                                                                                                                                                                                                                | 0.61 (0.26; 0.82)  | / | 59.1 | V |
| Using mobile phone AND listening to music                                                                                                                                                                                                                                                     | 0.67 (0.36; 0.85)  | / | 68.2 | V |

Note: ^ (scale has zero variance items), Δ (At least one variable in test-retest analyses is a constant). Agree (% agreement), LPA (light physical activities), CI (confidence interval). Interpretation 'usability': V (item has moderate-to-excellent reliability, so can be used as a reliable item ); X (item showed to have poor reliability, so cannot be used as a reliable single item)
