# Supplementary material for: Reliability and validity of three questionnaires measuring context-specific sedentary behaviour and associated correlates in adolescents, adults and older adults
Source: PubMed Central journal article supplement (PMC4574538; doi:10.1186/s12966-015-0277-2), 2015-09-17
Supplement: 12966_2015_277_MOESM6_ESM.pdf [file 12966_2015_277_MOESM6_ESM.pdf]

**Additional file 6** Results of the test-retest reliability study of the older adults: Intraclass Correlation Coefficients (ICC), kappa and percentage agreement (item-specific)

| Item (per part of the questionnaire)                                                                                                                                 | Test-retest reliability |       |       | Usability |
|----------------------------------------------------------------------------------------------------------------------------------------------------------------------|-------------------------|-------|-------|-----------|
|                                                                                                                                                                      | ICC (95% CI)            | kappa | agree |           |
| <b>A) Potential correlates of TV viewing</b>                                                                                                                         |                         |       |       |           |
| I think watching TV is pleasant                                                                                                                                      | 0.69 (0.36; 0.86)       | /     | 60.0  | V         |
| Watching TV takes time away from doing other important things                                                                                                        | 0.28 (-0.18; 0.63)      | /     | 70.0  | V         |
| I enjoy watching TV for many hours at a time                                                                                                                         | 0.79 (0.55; 0.91)       | /     | 50.0  | V         |
| Watching TV is my way to relax                                                                                                                                       | 0.43 (0.001; 0.73)      | /     | 45.0  | V         |
| My partner thinks I spend too much time watching TV                                                                                                                  | 0.00 (-0.47; 0.47)      | /     | 82.4  | V         |
| I think that I spend too much time watching TV                                                                                                                       | 0.34 (-0.12; 0.68)      | /     | 57.9  | X         |
| I consider it possible to reduce my TV time                                                                                                                          | 0.44 (0.01; 0.73)       | /     | 35.0  | V         |
| I consider it possible to turn off the TV during weekend days until 5:00 p.m.                                                                                        | 0.88 (0.72; 0.95)       | /     | 70.0  | V         |
| I consider it possible to turn off the TV during meals                                                                                                               | -0.06 (-0.48; 0.39)     | /     | 80.0  | V         |
| My partner encourages me to watch less TV                                                                                                                            | 0.00 (-0.47; 0.47)      | /     | 88.2  | V         |
| My friends encourage me to watch less TV                                                                                                                             | 0.00 (-0.43; 0.43)      | /     | 90.0  | V         |
| I think that people my age should not spend more than ... (hours/minutes per day) in front of TV                                                                     | 0.82 (0.60; 0.93)       | /     | 75.0  | V         |
| In which room do you watch TV most often?                                                                                                                            | 1.00 (1.00; 1.00)       | /     | 100   | V         |
| How long, on average, does your partner spend watching TV?                                                                                                           | 0.94 (0.83; 0.98)       | /     | 76.5  | V         |
| How often do you watch TV with your partner?                                                                                                                         | 0.57 (0.14; 0.82)       | /     | 52.9  | V         |
| To which extent do you consider it possible to implement standing tasks while watching TV (e.g. ironing, doing chores, playing with (grand)children - light effort)? | -0.19 (-0.57; 0.27)     | /     | 65.0  | V         |
| To which extent do you consider it possible to replace watching TV for 1 hour by tasks with light effort (e.g. cleaning, doing chores)?                              | 0.00 (-0.43; 0.43)      | /     | 35.0  | X         |
| To which extent do you consider it possible to stand up (short bouts) during advertisements while watching TV?                                                       | -0.02 (-0.45; 0.42)     | /     | 75.0  | V         |
| To which extent do you consider it possible to stand up to switch TV station?                                                                                        | 0.51 (0.11; 0.78)       | /     | 45.0  | V         |
| <b>B) Potential correlates of computer use</b>                                                                                                                       |                         |       |       |           |
| How long, on average, does your partner sit when using the computer (tablet, internet on smartphone, laptop, desktop,...)?                                           | 0.90 (0.74; 0.97)       | /     | 60.0  | V         |
| How often do you use the computer (seated) at the same moment with your partner using a different computer in the same room?                                         | 0.93 (0.79; 0.97)       | /     | 66.7  | V         |
| To which extent do you consider it possible to stand up while using a computer?                                                                                      | 0.92 (0.79; 0.97)       | /     | 81.3  | V         |
| To which extent do you consider it possible to replace using a computer for 1 hour by tasks with light effort (e.g. cleaning, doing chores)?                         | 0.24 (-0.32; 0.67)      | /     | 35.7  | X         |
| To which extent do you consider it possible to stand up for a couple of minutes after using a computer while sitting for 30 minutes?                                 | 0.03 (-0.46; 0.50)      | /     | 56.3  | X         |
| I think using a computer is pleasant                                                                                                                                 | 0.76 (0.45; 0.91)       | /     | 56.3  | V         |
| Using a computer takes time away from doing other important things                                                                                                   | 0.27 (-0.25; 0.66)      | /     | 68.8  | V         |
| I enjoy using a computer for many hours at a time                                                                                                                    | 0.92 (0.78; 0.97)       | /     | 62.5  | V         |
| Using a computer is my way to relax                                                                                                                                  | 0.63 (0.21; 0.85)       | /     | 31.3  | V         |
| My partner thinks I spend too much time using a computer                                                                                                             | 0.76 (0.42; 0.91)       | /     | 73.3  | V         |
| I think that I spend too much time using a computer                                                                                                                  | 0.49 (0.004; 0.78)      | /     | 62.5  | V         |
| I consider it possible that I do not use a computer for some days in the week                                                                                        | 0.44 (-0.06; 0.76)      | /     | 25.0  | V         |
| I consider it possible to reduce my computer time                                                                                                                    | 0.34 (-0.17; 0.71)      | /     | 31.3  | X         |
| My partner encourages me to spend less time using a computer                                                                                                         | 0.53 (0.05; 0.81)       | /     | 66.7  | V         |
| My friends encourage me to spend less time using a computer                                                                                                          | -0.15 (-0.59; 0.36)     | /     | 62.5  | V         |
| <b>C) Potential correlates of motorized transport</b>                                                                                                                |                         |       |       |           |
| I think using motorized transport is pleasant                                                                                                                        | 0.48 (0.06; 0.76)       | /     | 45.0  | V         |
| I think it is pleasant to work or to rest (e.g. drawing, making phone calls,...) as a passenger during motorized transport                                           | 0.05 (-0.39; 0.47)      | /     | 60.0  | X         |
| I feel lazy arriving at my destination after motorized transport                                                                                                     | 0.19 (-0.27; 0.57)      | /     | 65.0  | V         |
| I think that I spend too much time using motorized transport                                                                                                         | 0.13 (-0.33; 0.53)      | /     | 70.0  | V         |
| I consider it possible to get off the bus/metro spontaneously 1 stop before my destination and to walk the remaining distance                                        | 0.66 (0.31; 0.85)       | /     | 60.0  | V         |
| I consider it possible to park the car somewhat further spontaneously and to walk the remaining distance                                                             | 0.58 (0.19; 0.81)       | /     | 60.0  | V         |
| I consider it possible to take the bicycle or to go by foot spontaneously even if it is possible to use a car                                                        | 0.50 (0.9; 0.77)        | /     | 65.0  | V         |
| My partner encourages me to use (more often) active transport (to bicycle or to walk)                                                                                | 0.74 (0.41; 0.90)       | /     | 70.6  | V         |
| My friends encourage me to use (more often) active transport (to bicycle or to walk)                                                                                 | 0.04 (-0.40; 0.46)      | /     | 55.0  | X         |
| My partner thinks I spend too much time using motorized transport                                                                                                    | -0.17 (-0.59; 0.32)     | /     | 64.7  | V         |
| The most chosen transportation possibility from my partner is ...                                                                                                    | /                       | 0.51  | 76.5  | V         |
| To which extent do you consider it possible to stand up spontaneously in a bus, train or metro (instead of sitting)?                                                 | 0.76 (0.49; 0.90)       | /     | 75.0  | V         |
| To which extent do you consider it possible to stand up (for a short duration) after sitting for 30 minutes in bus, train or metro?                                  | 0.73 (0.43; 0.88)       | /     | 70.0  | V         |
| It is easy to park the car at public places (shops, station,...)                                                                                                     | 0.91 (0.78; 0.96)       | /     | 80.0  | V         |

|                                                                                                                                             |                    |   |      |   |
|---------------------------------------------------------------------------------------------------------------------------------------------|--------------------|---|------|---|
| I receive a lot of information about 'sitting activities' like cinema/theatre or sport games via billboards along the road and/or the radio | 0.04 (-0.40; 0.47) | / | 45.0 | X |
| How often do you use motorized transport together with your partner per weekday?                                                            | 0.23 (-0.27; 0.63) | / | 29.4 | X |
| How often do you use motorized transport together with your partner per weekend day?                                                        | -0.20 (-0.61;0.30) | / | 47.1 | X |

#### D) Potential correlates of household tasks and making phone calls

|                                                                                                                                                               |                    |      |      |   |
|---------------------------------------------------------------------------------------------------------------------------------------------------------------|--------------------|------|------|---|
| I think it is pleasant to sit while doing household tasks                                                                                                     | 0.75 (0.47; 0.89)  | /    | 75.0 | V |
| I work faster when I sit during household tasks                                                                                                               | 0.54 (0.14; 0.79)  | /    | 80.0 | V |
| I would like to stand more often while doing household tasks                                                                                                  | 0.52 (0.11; 0.78)  | /    | 85.0 | V |
| I think that I can stand up more often while doing household tasks                                                                                            | 0.42 (-0.02; 0.72) | /    | 80.0 | V |
| I consider it possible to stand up while calling                                                                                                              | 0.48 (0.06; 0.76)  | /    | 65.0 | V |
| I consider it possible to stand up while doing tasks in the kitchen                                                                                           | 0.88 (0.73; 0.95)  | /    | 90.0 | V |
| My partner encourages me to sit less while doing household tasks                                                                                              | 0.73 (0.40; 0.89)  | /    | 82.4 | V |
| Household tasks (and calling) are usually done while sitting by my partner                                                                                    | 0.66 (0.28; 0.86)  | /    | 76.5 | V |
| How would you like to perform the following household tasks?                                                                                                  |                    |      |      |   |
| Making phone calls                                                                                                                                            | /                  | 0.89 | 95.0 | V |
| Peeling potatoes/cutting vegetables                                                                                                                           | /                  | 0.39 | 80.0 | V |
| Ironing                                                                                                                                                       | /                  | 1.00 | 100  | V |
| Folding laundry                                                                                                                                               | /                  | 1.00 | 100  | V |
| Brushing teeth                                                                                                                                                | /                  | Δ    | 100  | V |
| To repair something small                                                                                                                                     | /                  | 0.38 | 80.0 | V |
| To which extent do you consider it possible to do more household tasks while being upright?                                                                   | 0.65 (0.30; 0.84)  | /    | 90.0 | V |
| To which extent do you consider it possible to remove appliances so that you would have to stand up to operate them (e.g. printer, remote controller TV,...)? | 0.67 (0.33; 0.85)  | /    | 65.0 | V |
| I am sure that I can interrupt my sitting activities (more often) at home, even if my partner is not doing this                                               | -0.14 (-0.57;0.35) | /    | 64.7 | V |
| I am sure that I can interrupt my sitting activities (more often) at home, even if my partner do not support/understand me                                    | -0.19 (-0.61;0.30) | /    | 64.7 | V |

#### E) Sedentary-related equipment

|                                                                                                    |                    |   |      |   |
|----------------------------------------------------------------------------------------------------|--------------------|---|------|---|
| How many of the following non-portable electronic devices do you use and are present at your home? |                    |   |      |   |
| Number of TVs                                                                                      | 1.00 (1.00; 1.00)  | / | 100  | V |
| Number of DVD players/video players                                                                | 0.92 (0.82; 0.97)  | / | 95.0 | V |
| Number of music players (radio, CD player, stereo,...)                                             | 0.86 (0.67; 0.94)  | / | 75.0 | V |
| Number of computers (desktop)                                                                      | 0.80 (0.56; 0.92)  | / | 90.0 | V |
| Number of telephones (dedicated line)                                                              | 1.00 (1.00; 1.00)  | / | 100  | V |
| How many of these non-portable electronic devices are present in your bedroom?                     |                    |   |      |   |
| Number of TVs                                                                                      | 1.00 (1.00; 1.00)  | / | 100  | V |
| Number of DVD players/video players                                                                | ^                  | / | 100  | V |
| Number of music players (radio, CD player, stereo,...)                                             | 0.00 (-0.43; 0.43) | / | 90.0 | V |
| Number of computers (desktop)                                                                      | ^                  | / | 100  | V |
| Number of telephones (dedicated line)                                                              | 0.89 (0.75; 0.96)  | / | 95.0 | V |
| How many of the following portable electronic devices do you use and are present at your home?     |                    |   |      |   |
| Number of laptops                                                                                  | 1.00 (1.00; 1.00)  | / | 100  | V |
| Number of mobile phones (no smartphone)                                                            | 1.00 (1.00; 1.00)  | / | 100  | V |
| Number of smartphones                                                                              | 1.00 (1.00; 1.00)  | / | 100  | V |
| Number of music players (iPod, MP3,...)                                                            | 0.67 (0.34; 0.86)  | / | 90.0 | V |
| Number of tablets (iPad, Samsung Galaxy Tab,...)                                                   | 0.67 (0.34; 0.86)  | / | 85.0 | V |
| The remote controller (TV) can always be found closely to me when I need it                        | 0.11 (-0.34; 0.52) | / | 80.0 | V |
| The couches at our place are comfortable to sit for a long time                                    | -0.07 (-0.49;0.37) | / | 85.0 | V |

#### F) Sedentary behaviours

|                                                                                                                                                                                                                                                        |                   |   |      |   |
|--------------------------------------------------------------------------------------------------------------------------------------------------------------------------------------------------------------------------------------------------------|-------------------|---|------|---|
| In the last 7 days, on average, how long did you spend sitting or lying down watching TV per weekday? (do include meals while sitting and watching TV)                                                                                                 | 0.82 (0.60; 0.93) | / | 70.0 | V |
| In the last 7 days, on average, how long did you spend sitting or lying down watching TV per weekend day? (do include meals while sitting and watching TV)                                                                                             | 0.63 (0.27; 0.84) | / | 40.0 | V |
| In the last 7 days, on average, how long did you spend sitting/lying down during computer use per weekday?                                                                                                                                             | 0.83 (0.58; 0.94) | / | 56.3 | V |
| In the last 7 days, on average, how long did you spend sitting during computer use per weekend day?                                                                                                                                                    | 0.83 (0.59; 0.94) | / | 50.0 | V |
| In the last 7 days, on average, how long did you sit while using motorized transport (e.g. to shops, friends,...) per weekday (in a car, bus, train, metro, on a motorbike, moped; do not include cycling on a pedal bicycle or electric bicycle)?     | 0.48 (0.06; 0.76) | / | 25.0 | V |
| In the last 7 days, on average, how long did you sit while using motorized transport (e.g. to shops, friends,...) per weekend day (in a car, bus, train, metro, on a motorbike, moped; do not include cycling on a pedal bicycle or electric bicycle)? | 0.71 (0.39; 0.87) | / | 25.0 | V |

|                                                                                                                                                                                              |                     |   |      |   |
|----------------------------------------------------------------------------------------------------------------------------------------------------------------------------------------------|---------------------|---|------|---|
| How long of previous-mentioned time did you drive a motorized vehicle yourself per weekday (moped, motorbike or car; do not include cycling on an electric bicycle)?                         | 0.58 (0.20; 0.81)   | / | 40.0 | V |
| How long of previous-mentioned time did you drive a motorized vehicle yourself per weekend day (moped, motorbike or car; do not include cycling on an electric bicycle)?                     | 0.83 (0.60; 0.93)   | / | 44.4 | V |
| In the last 7 days, on average, how much time per day did you spend sitting while doing household tasks (e.g. cooking, ironing, small repairs like changing a lamp/battery) per weekday?     | 0.79 (0.54; 0.91)   | / | 65.0 | V |
| In the last 7 days, on average, how much time per day did you spend sitting while doing household tasks (e.g. cooking, ironing, small repairs like changing a lamp/battery) per weekend day? | 0.77 (0.50; 0.90)   | / | 75.0 | V |
| In the last 7 days, on average, how much time per day did you spend sitting/lying down while making phone calls at home per weekday?                                                         | 0.41 (-0.03; 0.72)  | / | 60.0 | V |
| In the last 7 days, on average, how much time per day did you spend sitting/lying down while making phone calls at home per weekend day?                                                     | 0.25 (-0.20; 0.62)  | / | 55.0 | X |
| In the last 7 days, on average, how long did you spend sitting or lying down during the following activities per day?                                                                        |                     |   |      |   |
| Sitting while reading (book, newspaper,...) on a weekday                                                                                                                                     | 0.92 (0.81; 0.97)   | / | 45.0 | V |
| Sitting while reading (book, newspaper,...) on a weekend day                                                                                                                                 | 0.68 (0.35; 0.86)   | / | 35.0 | V |
| Sitting while caring (grandchildren, others) on a weekday                                                                                                                                    | 0.20 (-0.25; 0.58)  | / | 80.0 | V |
| Sitting while caring (grandchildren, others) on a weekend day                                                                                                                                | ^                   | / | 95.0 | V |
| Sitting for hobbies (voluntary work, playing cards, sewing, Sudoku, crossword,...) on a weekday                                                                                              | 0.22 (-0.24; 0.60)  | / | 50.0 | X |
| Sitting for hobbies (voluntary work, playing cards, sewing, Sudoku, crossword,...) on a weekend day                                                                                          | 0.19 (-0.27; 0.57)  | / | 50.0 | X |
| Sitting for socializing (visiting friends, in a pub,...) on a weekday                                                                                                                        | 0.54 (0.14; 0.79)   | / | 40.0 | V |
| Sitting for socializing (visiting friends, in a pub,...) on a weekend day                                                                                                                    | 0.49 (0.07; 0.76)   | / | 10.0 | V |
| Sitting while listening to music (radio, CD,...) on a weekday                                                                                                                                | -0.10 (-0.51; 0.35) | / | 50.0 | X |
| Sitting while listening to music (radio, CD,...) on a weekend day                                                                                                                            | -0.13 (-0.53; 0.33) | / | 50.0 | X |
| Sitting during meals (breakfast,...) on a weekday - do NOT include meals while sitting and watching TV                                                                                       | 0.82 (0.60; 0.92)   | / | 80.0 | V |
| Sitting during meals (breakfast,...) on a weekend day - do NOT include meals while sitting and watching TV                                                                                   | 0.83 (0.61; 0.93)   | / | 80.0 | V |
| Afternoon nap on a weekday                                                                                                                                                                   | 0.95 (0.88; 0.98)   | / | 70.0 | V |
| Afternoon nap on a weekend day                                                                                                                                                               | 0.80 (0.56; 0.92)   | / | 75.0 | V |
| <b>G) Simultaneous behaviour</b>                                                                                                                                                             |                     |   |      |   |
| How often do you do the following situations at the same time (simultaneously)?                                                                                                              |                     |   |      |   |
| Watching TV AND using mobile phone                                                                                                                                                           | 0.95 (0.89; 0.98)   | / | 85.0 | V |
| Watching TV AND using computer/tablet                                                                                                                                                        | 0.92 (0.80; 0.97)   | / | 85.0 | V |
| Using computer AND using mobile phone                                                                                                                                                        | 0.85 (0.67; 0.94)   | / | 90.0 | V |
| Using computer AND listening to music                                                                                                                                                        | 0.88 (0.72; 0.95)   | / | 65.0 | V |
| Using mobile phone AND having conversation with friends/family                                                                                                                               | 0.99 (0.98; 1.00)   | / | 95.0 | V |
| Using mobile phone AND listening to music                                                                                                                                                    | 0.94 (0.86; 0.98)   | / | 85.0 | V |
| Sewing (or similar tasks) AND watching TV                                                                                                                                                    | 0.78 (0.53; 0.91)   | / | 95.0 | V |

Note: ^ (scale has zero variance items), Δ (At least one variable in test-retest analyses is a constant). Agree (% agreement), LPA (light physical activities), CI (confidence interval). Interpretation 'usability': V (item has moderate-to-excellent reliability, so can be used as a reliable item); X (item showed to have poor reliability, so cannot be used as a reliable single item)
